# Supplementary material for: Efficacy, safety and response predictors of adjuvant astragalus for diabetic kidney disease (READY): study protocol of an add-on, assessor-blind, parallel, pragmatic randomised controlled trial
Source: PubMed Central journal article supplement — BMJ Open. 2021 Jan 12;11(1):e042686. doi: 10.1136/bmjopen-2020-042686 (PMC7805381; doi:10.1136/bmjopen-2020-042686), 2021-01-12
Supplement: bmjopen-2020-042686.draft_revisions.pdf [file bmjopen-2020-042686.draft_revisions.pdf]

# BMJ Open

BMJ Open is committed to open peer review. As part of this commitment we make the peer review history of every article we publish publicly available.

When an article is published we post the peer reviewers' comments and the authors' responses online. We also post the versions of the paper that were used during peer review. These are the versions that the peer review comments apply to.

The versions of the paper that follow are the versions that were submitted during the peer review process. They are not the versions of record or the final published versions. They should not be cited or distributed as the published version of this manuscript.

BMJ Open is an open access journal and the full, final, typeset and author-corrected version of record of the manuscript is available on our site with no access controls, subscription charges or pay-per-view fees (<http://bmjopen.bmj.com>).

If you have any questions on BMJ Open's open peer review process please email [info.bmjopen@bmj.com](mailto:info.bmjopen@bmj.com)

# BMJ Open

## Efficacy, Safety and Response Predictors of Adjuvant Astragalus for Diabetic Kidney Disease (READY) – Study Protocol of an Add-on, Assessor-blind, Parallel, Pragmatic Randomised Controlled Trial

|                               |                                                                                                                                                                                                                                                                                                                                                                                                                                                                                                                                                                                                                                                                                                                                                                                                                                                                                                                                                                                                                                                                                                                                                                                                                         |
|-------------------------------|-------------------------------------------------------------------------------------------------------------------------------------------------------------------------------------------------------------------------------------------------------------------------------------------------------------------------------------------------------------------------------------------------------------------------------------------------------------------------------------------------------------------------------------------------------------------------------------------------------------------------------------------------------------------------------------------------------------------------------------------------------------------------------------------------------------------------------------------------------------------------------------------------------------------------------------------------------------------------------------------------------------------------------------------------------------------------------------------------------------------------------------------------------------------------------------------------------------------------|
| Journal:                      | <i>BMJ Open</i>                                                                                                                                                                                                                                                                                                                                                                                                                                                                                                                                                                                                                                                                                                                                                                                                                                                                                                                                                                                                                                                                                                                                                                                                         |
| Manuscript ID                 | bmjopen-2020-042686                                                                                                                                                                                                                                                                                                                                                                                                                                                                                                                                                                                                                                                                                                                                                                                                                                                                                                                                                                                                                                                                                                                                                                                                     |
| Article Type:                 | Protocol                                                                                                                                                                                                                                                                                                                                                                                                                                                                                                                                                                                                                                                                                                                                                                                                                                                                                                                                                                                                                                                                                                                                                                                                                |
| Date Submitted by the Author: | 11-Jul-2020                                                                                                                                                                                                                                                                                                                                                                                                                                                                                                                                                                                                                                                                                                                                                                                                                                                                                                                                                                                                                                                                                                                                                                                                             |
| Complete List of Authors:     | <p>CHAN, Kam Wa; The University of Hong Kong, Department of Medicine<br/> KWONG, Alfred; Hospital Authority Hong Kong West Cluster, Department of Family Medicine and Primary Healthcare<br/> TSUI, Pun Nang ; Hospital Authority Hong Kong East Cluster, Department of Family Medicine and Primary Healthcare<br/> CHEUNG, Simon Chi Yuen ; Queen Elizabeth Hospital, Department of Medicine<br/> CHAN, Gary; Queen Mary Hospital, Division of Nephrology, Department of Medicine<br/> CHOI, Wing Fai ; University of Hong Kong, School of Chinese Medicine<br/> YIU, Wai Han ; The University of Hong Kong, Division of Nephrology, Department of Medicine<br/> ZHANG, Yanbo ; University of Hong Kong, School of Chinese Medicine<br/> Wong, Michelle Man-Ying; Hospital Authority Hong Kong East Cluster, Department of Family Medicine and Primary Healthcare<br/> Zhang, Zhang-Jin; University of Hong Kong, School of Chinese Medicine<br/> TAN, Kathryn; The University of Hong Kong, Department of Medicine<br/> Lao, Lixing; University of Hong Kong, School of Chinese Medicine;<br/> Virginia University of Integrative Medicine<br/> TANG, Sydney; The University of Hong Kong, Department of Medicine</p> |
| Keywords:                     | <p>Diabetic nephropathy &amp; vascular disease &lt; DIABETES &amp; ENDOCRINOLOGY, Clinical trials &lt; THERAPEUTICS, COMPLEMENTARY MEDICINE, DIABETES &amp; ENDOCRINOLOGY, Nephrology &lt; INTERNAL MEDICINE</p>                                                                                                                                                                                                                                                                                                                                                                                                                                                                                                                                                                                                                                                                                                                                                                                                                                                                                                                                                                                                        |
|                               |                                                                                                                                                                                                                                                                                                                                                                                                                                                                                                                                                                                                                                                                                                                                                                                                                                                                                                                                                                                                                                                                                                                                                                                                                         |

SCHOLARONE™  
Manuscripts

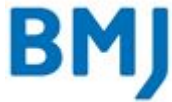

I, the Submitting Author has the right to grant and does grant on behalf of all authors of the Work (as defined in the below author licence), an exclusive licence and/or a non-exclusive licence for contributions from authors who are: i) UK Crown employees; ii) where BMJ has agreed a CC-BY licence shall apply, and/or iii) in accordance with the terms applicable for US Federal Government officers or employees acting as part of their official duties; on a worldwide, perpetual, irrevocable, royalty-free basis to BMJ Publishing Group Ltd ("BMJ") its licensees and where the relevant Journal is co-owned by BMJ to the co-owners of the Journal, to publish the Work in this journal and any other BMJ products and to exploit all rights, as set out in our [licence](#).

The Submitting Author accepts and understands that any supply made under these terms is made by BMJ to the Submitting Author unless you are acting as an employee on behalf of your employer or a postgraduate student of an affiliated institution which is paying any applicable article publishing charge ("APC") for Open Access articles. Where the Submitting Author wishes to make the Work available on an Open Access basis (and intends to pay the relevant APC), the terms of reuse of such Open Access shall be governed by a Creative Commons licence – details of these licences and which [Creative Commons](#) licence will apply to this Work are set out in our licence referred to above.

Other than as permitted in any relevant BMJ Author's Self Archiving Policies, I confirm this Work has not been accepted for publication elsewhere, is not being considered for publication elsewhere and does not duplicate material already published. I confirm all authors consent to publication of this Work and authorise the granting of this licence.

1  
2  
3  
4 **Efficacy, Safety and Response Predictors of Adjuvant Astragalus for Diabetic Kidney**

5  
6  
7 **Disease (READY) – Study Protocol of an Add-on, Assessor-blind, Parallel, Pragmatic**

8  
9  
10 **Randomised Controlled Trial**

11  
12  
13  
14 Kam Wa CHAN BCM MSPH MD PHD<sup>1</sup>, Alfred Siu Kei KWONG MBBS<sup>2</sup>, Pun Nang TSUI

15  
16  
17 MBBS<sup>3</sup>, Simon Chi Yuen CHEUNG MBBS MD PHD<sup>4</sup>, Gary Chi Wang CHAN MBBS PHD<sup>5</sup>,

18  
19  
20 Wing Fai CHOI BCM<sup>6</sup>, Wai Han YIU PHD<sup>1</sup>, Yanbo ZHANG PHD<sup>6</sup>, Michelle Man Ying

21  
22  
23 WONG MBBS<sup>3</sup>, Zhangjing ZHANG MB MD<sup>6</sup>, Kathryn Choon Beng TAN MBBCH MD<sup>7</sup>, Lixing

24  
25  
26 LAO MB PHD<sup>6,8</sup>, Sydney Chi Wai TANG MBBS MD PHD<sup>1\*</sup>

27  
28  
29 <sup>1</sup> Division of Nephrology, Department of Medicine, The University of Hong Kong, Hong Kong SAR, China

30  
31  
32 <sup>2</sup> Department of Family Medicine and Primary Healthcare, Hospital Authority Hong Kong West Cluster, Hong  
33  
34 Kong SAR, China

35  
36  
37  
38 <sup>3</sup> Department of Family Medicine and Primary Healthcare, Hospital Authority Hong Kong East Cluster, Hong  
39  
40 Kong SAR, China

41  
42  
43 <sup>4</sup> Division of Nephrology, Department of Medicine, Queen Elizabeth Hospital, Hong Kong SAR, China

44  
45  
46  
47 <sup>5</sup> Division of Nephrology, Department of Medicine, Queen Mary Hospital, Hong Kong SAR, China

48  
49  
50 <sup>6</sup> School of Chinese Medicine, The University of Hong Kong, Hong Kong SAR, China

51  
52  
53  
54 <sup>7</sup> Division of Endocrinology, Department of Medicine, The University of Hong Kong, Hong Kong SAR, China

55  
56  
57  
58  
59  
60 <sup>8</sup> Virginia University of Integrative Medicine, Virginia, USA

1  
2  
3  
4 **Running Title**  
5

6  
7 Randomised controlled trial of astragalus for diabetic kidney disease  
8  
9

10 **Corresponding Author**  
11  
12

13 \*Sydney Chi Wai TANG,  
14

15  
16 Department of Medicine, 4/F Professorial Block, 102 Pokfulam Road, Hong Kong  
17  
18

19 (Email: [scwtang@hku.hk](mailto:scwtang@hku.hk), Tel: +852 2255 4777)  
20  
21

22 **Word Count**  
23  
24

25 3362 words, 1 figure, 1 table, 52 references, 2 appendixes, 1 supplementary file  
26  
27  
28  
29  
30  
31  
32  
33  
34  
35  
36  
37  
38  
39  
40  
41  
42  
43  
44  
45  
46  
47  
48  
49  
50  
51  
52  
53  
54  
55  
56  
57  
58  
59  
60

## Abstract

### Introduction

Diabetic kidney disease (DKD) is a prevalent and costly complication of diabetes with limited therapeutic options, leading the cause of end-stage renal disease in most developed regions. Recent big data studies showed that add-on Chinese medicine (CM) led to reduced risk of end-stage renal disease and mortality among chronic kidney disease patients with diabetes. Astragalus, commonly known as huang-qi, is the most prescribed CM or used dietary herb in China for diabetes and DKD. *In vivo* and *in vitro* studies showed that astragalus could ameliorate podocyte apoptosis, foot process effacement, mesangial expansion, glomerulosclerosis and interstitial fibrosis. Nevertheless, the clinical effect of astragalus remained uncharacterised. This pragmatic clinical trial aims to evaluate the effectiveness of add-on astragalus on type 2 diabetic patients with stage 2 to 3 chronic kidney disease and macroalbuminuria and identify related response predictors.

### Methods and analysis

This is an add-on, assessor-blind, parallel, pragmatic randomised controlled clinical trial. 118 patients diagnosed with DKD will be recruited and randomised 1:1 to a 48-week add-on astragalus or standard medical care. Primary endpoints are the changes in estimated glomerular filtration rate and urine albumin-to-creatinine ratio between baseline and

1  
2  
3  
4 treatment endpoint. Secondary endpoints include adverse events, fasting blood glucose,  
5  
6  
7 glycated haemoglobin, lipids and other biomarkers. Adverse events are monitored through  
8  
9  
10 self-complete questionnaire and clinical visits. Outcomes will be analysed by regression  
11  
12  
13 models. Subgroup and sensitivity analyses will be conducted for different epidemiological  
14  
15  
16 subgroups and statistical analyses. Enrollment started in July 2018.

### 17 18 19 **Ethics and dissemination**

20  
21  
22 This study was approved by the Institutional Review Board of the University of Hong Kong /  
23  
24  
25 Hospital Authority Hong Kong West/East/Kowloon Central clusters (UW 16-553/HKEC-  
26  
27  
28 2019-026/REC (KC/KE)-19-0049/ER-4). We will report the findings in medical journals and  
29  
30  
31 conferences. The dataset will be available upon reasonable request.

### 32 33 34 **Trial registration**

35  
36  
37 This study is prospectively registered on ClinicalTrials.gov (NCT03535935) on 24 May  
38  
39  
40 2018.

## STENGTHS AND LIMITATIONS

### Strengths

1. Existing epidemiological data suggested that Chinese medicine was associated with retarded progression of renal function among diabetic kidney disease patients and it is timely to perform a clinical trial on astragalus, the most used herbs in diabetes and diabetic kidney disease with unclear clinical effectiveness.
2. The inclusion / exclusion criteria, primary outcome measurement and the corresponding analyses are designed according to conventionally used parameters to facilitate further meta-analysis with other clinical studies for wide range of audience.
3. A responder analysis is built into the trial as secondary analysis to identify possible factors (including biomarkers and symptom-based diagnosis) that could lead to more personalised the use of astragalus.
4. We conducted a focus group interview series to explore the expectations of patients and clinicians (both conventional and Chinese medicine) to refine the study design (drug form, dosage, administration route, frequency, health services delivery and outcome measurement) for better clinical translation.

### Limitations

1. As the trial is open-label, subjective outcomes including quality of life could not be assessed.



1  
2  
3  
4 **Keywords**  
5  
6

7 Diabetic kidney disease; clinical trial; astragalus, huangqi; effectiveness; renal medicine  
8  
9  
10  
11  
12  
13  
14  
15  
16  
17  
18  
19  
20  
21  
22  
23  
24  
25  
26  
27  
28  
29  
30  
31  
32  
33  
34  
35  
36  
37  
38  
39  
40  
41  
42  
43  
44  
45  
46  
47  
48  
49  
50  
51  
52  
53  
54  
55  
56  
57  
58  
59  
60

For peer review only

## Introduction

In 2019, it was estimated that 463 million (9.3%) people was living with diabetes worldwide and the figure was projected to reach 578 million by 2030, with the highest prevalence in North America at present. (1) In 2017, The healthcare expenditure on diabetes reached US\$ 850 billion globally (11.6% of global health expenditure). (2, 3) Diabetic kidney disease (DKD) refers to the chronic kidney disease (CKD) caused by long-standing diabetes. DKD presents in more than one third of all diabetic patients and is the leading cause of end-stage renal disease in many developed regions which requires replacement therapy including dialysis and transplantation. (4, 5) In Hong Kong, the incidence of diabetes-related end-stage renal disease increased from 26.2% in 1996 to 49.6% in 2013 (6) and end-stage renal disease increased 5.23 times the annual direct medical cost to the local public health system. (7) Furthermore, DKD was accounted for 23.4% (31.1% vs 7.7%) absolute increase in 10-year mortality in US (8) and 16 years shorter life-expectancy in Taiwan (9) when compared to those without diabetes and kidney diseases.

The risk factors and pathogenesis of DKD are heterogeneous (5) involving metabolic, (10, 11) inflammatory, (12-14) hemodynamic, (15-18) and many other pathways. (5, 19) Conventional blockade on the renin–angiotensin–aldosterone system (RAAS) offers limited effect on clinical outcomes. (20-23) In a previous meta-analysis of 9797 patients with stage 3 to 5 CKD, RAAS blockade did not reduce all-cause mortality and only provided a mild risk

1  
2  
3  
4 reduction in the composite endpoint of replacement therapy initiation or doubling of serum  
5  
6  
7 creatinine when compared to placebo or other antihypertensive agents. (21) RAAS blockade  
8  
9  
10 with combined angiotensin-converting enzyme inhibitor (ACEI) and angiotensin II receptor  
11  
12  
13 blocker (ARB) resulted in increased adverse events but not the expected synergistic effect. (22,  
14  
15  
16 24) More therapies with different working mechanisms are needed.

17  
18  
19 Chinese Medicine (CM) has been extensively used among diabetes and DKD patients in  
20  
21  
22 Asia. (25, 26) Previous observational studies from Taiwan with 47,876 and 24,971 subjects  
23  
24  
25 showed that the use of add-on prescribed CM is associated with 40% reduction of mortality  
26  
27  
28 (26) and 59% risk reduction of end-stage renal disease, respectively. (25) *Astragalus*  
29  
30  
31 *membranaceus*, commonly known as huang-qi, is the most frequently used CM or dietary herb  
32  
33  
34 for DKD. (27) Systematic reviews showed that astragalus could enhance creatinine clearance,  
35  
36  
37 reduce albuminuria and reduce blood pressure among CKD and DKD patients. (28-30) Meta-  
38  
39  
40 analysis also showed that astragalus' effect in improving renal clearance and reducing  
41  
42  
43 albuminuria was better than routine care (without ACEI or ARB) and the efficacy was  
44  
45  
46 comparable to ACEI or ARB. (30) *In vivo* and *in vitro* evidence suggested that astragaloside  
47  
48  
49 IV, an active ingredient of astragalus, could ameliorate podocyte apoptosis, foot process  
50  
51  
52 effacement, mesangial expansion, glomerulosclerosis and interstitial fibrosis through  
53  
54  
55 regulating the NF- $\kappa$ B and TGF- $\beta_1$  signalling pathway, which partly explained the  
56  
57  
58 renoprotective effect. (31, 32) Nevertheless, the methodological reporting and quality of the  
59  
60

1  
2  
3  
4 existing clinical trials were inadequate and further evaluation is needed. Based on our  
5  
6  
7 preliminary result of ongoing trials, CM formulations containing astragalus is likely to retard  
8  
9  
10 the progression of DKD. (33, 34) Considering the extensive currently use of astragalus, clinical  
11  
12  
13 study could be considered before preclinical investigation as suggested by the World Health  
14  
15  
16 Organisation. (35)

For peer review only

## Methods/Design

### *Objective*

This pragmatic clinical trial aims to evaluate the effectiveness of add-on astragalus on type 2 diabetic patients with stage 2 to 3 chronic kidney disease and macroalbuminuria, and to identify related response predictors for subsequent large-scale health services research.

### *Study Design*

Add-on, assessor-blind, parallel, pragmatic randomised controlled trial.

### *Inclusion and exclusion criteria*

Patients with 1) type 2 diabetes for at least 5 years; 2) estimated glomerular filtration rate (GFR)  $\geq 30$  and  $< 90$  mL/min/1.73m<sup>2</sup> confirmed by repeated testing over three months calculated by the abbreviated MDRD study equation; (36, 37) 3) persistent macroalbuminuria with spot urine albumin-to-creatinine ratio (UACR)  $\geq 300$  mg/g confirmed by at least 2 consecutive first morning void urine samples; 4) age between 35 to 80 years old; 5) stable dose of anti-diabetic agent(s) including insulin for at least 12 weeks; and 6) stable dose of ACEI or ARB for at least 12 weeks will be recruited.

Patients will be excluded if with 1) UACR  $\geq 5000$  mg/g; 2) a known history of glomerulonephritis, polycystic kidney disease, systemic lupus erythematosus or any suggestive evidence of nondiabetic glomerulopathy; 3) known history of kidney transplant; 4) concurrent severe disorders of heart, brain, liver, and hematopoietic system, tumor, mental

disorder; 5) deranged liver function; 6) poorly controlled blood pressure; 7) known history of intolerance or malabsorption of oral medications; 8) uncontrollable urinary infection; 9) experiencing pregnancy; and 10) participating in other clinical trial(s) within 30 days.

### ***Sample size calculation***

Since the primary objective of this trial is to evaluate key clinical outcomes and to perform a preliminary analysis on potential response predictors, we calculated the sample size based on the control of inflation factor (IF) to the estimation of sample size for the subsequent large-scale studies (38, 39). 118 patients (around 60 per group) are needed.

$$IF = S_{ucl} / S_{obs} = \sqrt{(n-1) / \chi^2_{1-\alpha, n-1}}$$

$$N_{adj} / N_{unadj} \approx IF^2 \approx n_{unadj} * IF^2$$

$$N \approx [2(\phi_{1-\alpha/2} + \phi_{1-\beta})^2 (IF * s)^2 / (\mu_1 - \mu_2)^2] = [2(\phi_{1-\alpha/2} + \phi_{1-\beta})^2 s^2 / (\mu_1 - \mu_2)^2]$$

$$\phi_{1-\beta'} = \phi_{1-\alpha/2} (IF^{-1} - 1) + \phi_{1-\beta} * IF^{-1}$$

where IF = Inflation factor

$S_{ucl}$  = Standard deviation of upper confidence interval

$S_{obs}$  = Observed standard deviation in pilot study

$\alpha$  = Chosen confidence level

$\beta$  = Nominal power set for main study

1  
2  
3  
4  $\beta'$  = Actual power achieved for main study by using pilot standard deviation

5  
6  
7 for sample size calculation

8  
9  
10  $n$  = Sample size of pilot study

11  
12  
13  $N$  = Sample size of main study

14  
15  
16  $N_{\text{unadj}}$  = Sample size of main study with no adjustment on standard deviation

17  
18  
19  $N_{\text{adj}}$  = Sample size of main study with adjustment on standard deviation

20  
21  
22  
23  
24  
25 The standard deviation used for sample size calculation for large-scale main studies is  
26 often underestimated by small-scale pilot studies, therefore an IF is needed for adjustment in  
27 sample size calculation. (38, 39) IF is calculated based on the size of pilot study and the  
28 confidence level of achieving at least the desired power in subsequent main studies.  
29  
30  
31  
32  
33  
34  
35

36  
37 Therefore, the actual achieved power of the main studies depends on the nominal power set  
38 for the main study and the IF.  
39  
40  
41  
42

43 In order to be 95% confident (two-sided) that the main study achieves a power of 70%  
44 with nominal power set at 80% (i.e., a 10% power forfeit), the IF should be controlled to less  
45 than 1.13. At IF = 1.13, a sample size of 100 is therefore needed to attain 95% one-sided  
46 confidence that the main studies will achieve the nominal power to test the hypothesis of add-  
47 on astragalus could be more effective in stabilising the GFR among DKD patients when  
48 compared to standard care. To allow a 15% attrition rate, a sample size of 118 patients is  
49  
50  
51  
52  
53  
54  
55  
56  
57  
58  
59  
60

1  
2  
3  
4 therefore needed for this pilot study.  
5  
6

7         Currently, there is limited evidence on the symptom-based response predictors of  
8  
9  
10         astragalus. A general recommendation for power estimation is to have 10 events per variable  
11  
12  
13         (40). From the previous systematic review, we estimate that around 60% of patients will have  
14  
15  
16         stabilised GFR after receiving astragalus. (30) 118 subjects with 15% attrition will power up  
17  
18  
19         to 6 variables for the screening of predictors. A univariable screening on the 11 pre-specified  
20  
21  
22         potential symptom-based predictors will be conducted to reduce the number of predictors for  
23  
24  
25         the subsequent multivariable regression analysis, in order to maximise the power of the  
26  
27  
28         regression analysis.  
29

### 30 31 ***Recruitment and randomisation*** 32

33  
34         Patients will be recruited from general and specialist outpatient clinics of Queen Mary  
35  
36  
37         Hospital, Queen Elizabeth Hospital, Hospital Authority Hong Kong East Cluster through  
38  
39  
40         consultations, and the community via public health campaigns. The details of study will be  
41  
42  
43         explained by principal investigators (PIs) or co-investigators (Co-Is) before written consent is  
44  
45  
46         obtained from each participating patient. All patients will undergo a 2-week run-in period,  
47  
48  
49         during which the dosage of their medications will be stabilised. Blood and urine sample will  
50  
51  
52         be sent to an independent local laboratory for screening. Patients are considered eligible for  
53  
54  
55         the study if their liver functions are normal and fulfil the inclusion criteria. Recruitment  
56  
57  
58         started in July 2018 and the recruitment is on-going.  
59  
60



1  
2  
3  
4 A random sequence was generated and encrypted with computer by an independent staff  
5  
6  
7 of the University of Hong Kong and kept in sealed opaque envelopes. The password of the  
8  
9  
10 sequence is kept in a sealed, duly signed opaque envelop locked by research assistants (RAs).  
11  
12  
13 The allocation sequence is concealed from PIs, Co-Is, CM physicians and all research staffs  
14  
15  
16 that are responsible for patient screening, randomisation or sample analysis. Eligible patients  
17  
18  
19 will be randomised to either receive active intervention along with standard care or standard  
20  
21  
22 care alone. The allocation is masked from the outcome assessor (laboratory technicians). The  
23  
24  
25 study subjects could not be masked due to the nature of treatment. Since the primary clinical  
26  
27  
28 outcomes under investigation are objectively assessed and the outcome assessor is blinded,  
29  
30  
31 placebo effect and outcome measurement bias should be minimised. The flow of study is  
32  
33  
34 presented in **Figure 1**. Under no circumstances the primary outcome assessors will be  
35  
36  
37 unblinded.

### 40 ***Intervention and control***

41  
42  
43 The intervention under investigation is astragalus. Patients under intervention will receive  
44  
45  
46 astragalus daily on top of standard medical care for 48 weeks. The CM physicians will advise  
47  
48  
49 on the dose and possible adverse events of astragalus based on his/her professional  
50  
51  
52 knowledge. Existing literature supports a safe dosage of raw astragalus from 15 to 50 g/day.  
53  
54  
55 (41, 42) According to the China Pharmacopeia, the recommended therapeutic dosage of  
56  
57  
58 astragalus is below 30 g/day. To ensure the safety of patients, CM physicians are reminded  
59  
60

1  
2  
3  
4 not to propose dosage exceeding 30 g/day. All patients will continue their standard  
5  
6  
7 medication and follow-up with the same consultation schedule with CM physicians.  
8  
9

### 10 **Herbal safety**

11  
12 Soluble herbal granules prepared by PuraPharm (listed in US Pharmacopeia as dietary  
13  
14 ingredient: VER-DI-PUR-09) are used. The production process is in strict compliance with  
15  
16 standards of Good Manufacturing Practice (GMP). Fully registered CM physicians from the  
17  
18 School of Chinese Medicine, The University of Hong Kong will be responsible for the  
19  
20 clinical diagnosis and prescription. After 4 to 6 weeks of randomisation, all patients will  
21  
22 undergo liver function tests and renal function tests to monitor acute changes of renal and  
23  
24 liver function.  
25  
26  
27  
28  
29  
30  
31  
32  
33

### 34 ***Outcome measurement***

35  
36 The primary outcome measures are the changes of estimated GFR and UACR from baseline  
37  
38 (week 0) to treatment endpoint (week 48). Secondary outcome measures include adverse  
39  
40 events, and changes in CKD stage, fasting blood glucose (FBG), haemoglobin A<sub>1c</sub> (HbA<sub>1c</sub>),  
41  
42 lipids, urinary monocyte chemotactic protein 1 (MCP-1), urinary nephrin, urinary cystatin C  
43  
44 and urinary TGF- $\beta_1$  from baseline to the midpoint (week 24) and the end of treatment.  
45  
46  
47  
48  
49  
50  
51

### 52 **Data collection**

53  
54 Patient demographics including age, gender, body mass index (BMI), duration of diabetes,  
55  
56 other medical history and concurrent medications will be retrieved by the electronic clinical  
57  
58  
59  
60

1  
2  
3  
4 management system of Hospital Authority by Co-Is and RAs. Estimated GFR, UACR, FBG,  
5  
6  
7 HbA<sub>1c</sub>, lipids and liver function tests will be assessed by an independent laboratory (Chan &  
8  
9  
10 Hou Medical Laboratories Limited) which is accredited by College of American Pathologists,  
11  
12  
13 Royal College of Pathologists Australasia and Quality Control for Molecular Diagnostics  
14  
15  
16 UK. MCP-1, nephrin, cystatin C and TGF- $\beta_1$  will be assessed at lead-PI's research laboratory  
17  
18  
19 by an independent RA with commercially available kits. Blood pressure will be taken during  
20  
21  
22 consultation. Blood and urine samples will be taken at an overnight (>8 hours) fasting state.  
23  
24

25 Estimated GFR will be calculated using the MDRD equation with serum creatinine, age,  
26  
27  
28 ethnicity and gender. Clinical presentations and CM symptom-based diagnosis will be  
29  
30  
31 assessed in a structured consultation developed for this purpose. To ensure consistency and  
32  
33  
34 reliability of assessment and to minimise bias from investigators across the study, only 3  
35  
36  
37 synchronised CM physicians will assess the patients.  
38  
39

40 A self-complete questionnaire will be distributed to the subjects to monitor adverse  
41  
42  
43 events, and they are advised to inform the PIs, Co-Is, CM physicians or RAs immediately if  
44  
45  
46 adverse events arise. All adverse events will be coded based on Common Terminology  
47  
48  
49 Criteria for Adverse Events (CTCAE) 5.0, following the recommendation of CONSORT  
50  
51  
52 (Consolidated Standards of Reporting Trials) Extension for Chinese Herbal Medicine  
53  
54  
55 Formulas. (43)  
56  
57

58 Follow-up consultations will be held for all patients bi-weekly in the first month and  
59  
60

1  
2  
3  
4 monthly subsequently until the end of treatment for all patients. Minor adjustments are  
5  
6  
7 allowed based on clinical needs. Evaluation of outcomes will be performed at baseline, week  
8  
9  
10 24 (treatment midpoint) and 48 (end of treatment). The follow up schedule is summarised  
11  
12  
13 below in **Table 1**.

### 16 ***Data management***

17  
18  
19 A trial management committee (TMC) formed by lead-PI, Co-Is and RAs will centralise all  
20  
21  
22 trial data. Co-Is and RAs will collect, clean and send the data to TMC weekly. All data will be  
23  
24  
25 double entered, secured and cleaned before analysis to prevent data entry errors. TMC will  
26  
27  
28 have regular meetings monthly to discuss the progress and double check the data of the trial.  
29  
30  
31 Only PI, Co-Is and regulatory bodies will have access to the patient data to protect data privacy.  
32  
33  
34 An independent Data and Safety Monitoring Board (DSMB) (VCH Chung, W Wong, JWF  
35  
36  
37 Yeung) has been established with expert in methodology, biostatistics and clinical medicine to  
38  
39  
40 monitor the progress of the trial, including adverse events and change in protocol. DSMB will  
41  
42  
43 have meetings twice a year. No competing interests has been reported from DSMB. Trial result  
44  
45  
46 will be published in academic journal and trial subjects will be notified.  
47  
48

### 50 ***Handling of withdraw and dropout***

51  
52  
53 In order to maximise subjects' compliance, we will provide a triple thorough consent process  
54  
55  
56 for all participants covering details of the study schedule, potential side effects of treatment,  
57  
58  
59 and the responsibilities of the subjects. An independent e-mail account and a direct telephone  
60

1  
2  
3  
4 line is available for this study to enable active communication with patients. Extra visits will  
5  
6  
7 be arranged for patients if necessary. To monitor the adherence of study medication, we will  
8  
9  
10 arrange irregular visits for patients and count the unfinished medication.  
11  
12

### 13 ***Termination criteria***

14  
15  
16 The treatment will be terminated for a specific subject if he/she: 1) develops serious adverse  
17  
18 event (SAE); 2) develops hypersensitivity towards astragalus; and 3) participates in other  
19  
20 clinical trial. The whole study will be terminated under the following circumstances: 1)  
21  
22 presence of clustered SAE(s) related to astragalus with supportive evidence; and 2)  
23  
24  
25 completion of all follow-up assessments.  
26  
27  
28  
29

30  
31 SAE includes adverse events that result in death, require either hospitalisation or the  
32  
33 prolongation of hospitalisation, are life-threatening, result in a persistent or significant  
34  
35 disability/incapacity, result in a congenital anomaly/birth defect or events classified as Grade  
36  
37 3 or above in CTCAE 5.0. Other important medical events, based upon appropriate medical  
38  
39 judgement, may also be considered SAEs if a patient's health is at risk and intervention is  
40  
41 required to prevent an outcome mentioned.  
42  
43  
44  
45  
46  
47  
48

### 49 ***Data analysis***

50  
51  
52 Missing values will be imputed by multiple regression. The analysis will follow intention-to-  
53  
54 treat principle that all randomised patients will be included in the analysis. STATA and  
55  
56  
57  
58 PRISM will be used for the analysis.  
59  
60

1  
2  
3  
4 Demographics will be presented as mean  $\pm$  standard deviation or percentage. UACR will  
5  
6  
7 be log-transformed and reported as geometric means. Smoking history will be stratified into  
8  
9  
10 non-smoker, ex-smoker and current smoker. Rapid renal progression is pre-defined as a  
11  
12  
13 consecutive annual GFR drop of over 5 ml/min/1.73m<sup>2</sup> or a cumulative GFR drop of over 25  
14  
15  
16 ml/min/1.73m<sup>2</sup> for 5 years. (44, 45) Differences in mean and proportion between groups will  
17  
18  
19 be tested by t-test and  $\chi^2$  test.  
20  
21

22 Mixed regression models will be used to compare the rate of change in estimated GFR  
23  
24  
25 and UACR. Analysis of covariance (ANCOVA) will be used to compare the adjusted mean  
26  
27  
28 of outcomes at week 48 between intervention group and control group with the corresponding  
29  
30  
31 baseline values as covariates. Data will be presented as the difference in adjusted means  
32  
33  
34 between the groups with 95% CI and the corresponding p-value.  
35  
36

37 The adverse events will be recorded according to CTCAE 5.0 and categorised into 5  
38  
39  
40 grades (Grade 1: mild, asymptomatic or mild symptoms, clinical or diagnostic observations  
41  
42  
43 only, no intervention indicated; Grade 2: moderate, minimal, local or non-invasive  
44  
45  
46 intervention indicated, limiting age-appropriate instrumental activities of daily living; Grade  
47  
48  
49 3: severe or medically significant but not immediately life-threatening, hospitalisation or  
50  
51  
52 prolongation of hospitalisation indicated, disabling, limiting self-care activities of daily  
53  
54  
55 living; Grade 4: life-threatening consequences, urgent intervention indicated; and Grade 5:  
56  
57  
58 death related to adverse events). The percentage of all adverse events with more than 1 case  
59  
60

1  
2  
3  
4 will be compared between groups. SAE will be analysed case by case descriptively.  
5  
6

7 To minimise Type I error inflation, the analysis will follow a hierarchical approach in  
8  
9 the order of 1) comparison of baseline to end of treatment on estimated GFR and UACR; 2)  
10  
11 comparison of baseline to end of treatment on other outcome measurements; 3) comparison  
12  
13 of baseline to treatment midpoints on estimated GFR and UACR and 4) comparison of  
14  
15 baseline to treatment midpoints on other outcome measurements.  
16  
17  
18  
19  
20  
21

22 For the assessment of predictive factors as secondary analysis, the dependent variable  
23  
24 will be the treatment response which is categorised into:  
25  
26  
27

- 28 1. Improved or stabilised renal function, defined as estimated GFR after 48-week  
29  
30 treatment being higher or equal to baseline.  
31  
32
- 33 2. Non-responder, defined as patients having estimated GFR decreased at a rate of less  
34  
35 than 5 mL/min/1.73m<sup>2</sup> after 48-week treatment compared to baseline.  
36  
37  
38
- 39 3. Rapid deteriorating renal function, defined as estimated GFR of more than 8  
40  
41 mL/min/1.73m<sup>2</sup> after 48-week treatment compared to baseline.  
42  
43  
44  
45  
46  
47

48 Potential prognostic variables (baseline values) will include:  
49  
50

- 51 1. Demographics: age, gender, BMI, systolic blood pressure, history and duration of  
52  
53 smoking and alcohol consumption  
54  
55  
56  
57  
58  
59  
60

- 1  
2  
3  
4 2. Symptom-based diagnosis: presence of CM-based symptom-based subtype (e.g. *spleen*  
5  
6  
7 *and kidney qi deficiency*) based on the presentation of standardised and commonly  
8  
9  
10 documented signs and symptoms (46)  
11  
12  
13  
14 3. Biochemical profile: GFR, UACR, HbA<sub>1c</sub>, lipids  
15  
16  
17

18 All potential predictors will first be included into a multivariable stepwise regression  
19  
20 analysis. Variables that are not significant at a 5% level will be excluded.  
21  
22

23  
24 Subgroup analyses will be performed for 1) CKD stages stratified into stage 2, 3a and 3b;  
25  
26 (47) 2) UACR levels stratified by 100 mg/mmol; (48) 3) gender and 4) age groups. Sensitivity  
27  
28 analyses will be performed for 1) per-protocol cohort; 2) estimation of GFR by c-MDRD (49)  
29  
30 and CKD-EPI (50) equations; 3) missing data imputed with last-observation-carried-forward  
31  
32 and 4) different analytical approaches (change-score) and categorisations of primary outcomes.  
33  
34  
35  
36  
37  
38  
39

#### 40 **Patient and public involvement**

41  
42  
43 We conducted a focus group interview series to collate the experience and expectations of  
44  
45 patients and clinicians (both conventional and Chinese medicine) on the study design (drug  
46  
47 form, dosage, administration route, frequency, health services delivery and outcome  
48  
49 measurement) for this trial. (51) The study results will be disseminated to diabetes patient  
50  
51  
52  
53  
54  
55  
56  
57  
58  
59  
60 groups and the participants via public workshops and talks.



## Discussion

Diabetes and DKD are significant public health burdens and astragalus is the most used herbs among these patients with unclear clinical effectiveness. There is an urgent need to characterise the effect and response predictors of astragalus to prevent unnecessary consumption and to increase the cost-effectiveness of administration. Also, the assessment of response predictors of both biomarkers and symptom-based factors will facilitate the integration and clinical translation of generated evidence between conventional medicine and CM physicians. Based on our preliminary result of ongoing trials, CM formulations containing astragalus is likely to retard the progression of DKD. (33, 34) This trial aims to evaluate the effect of astragalus and identify related response predictors for more personalised application and further large-scale health services research.

To facilitate further meta-analysis with other clinical studies for wide range of audience, the inclusion / exclusion criteria, primary outcome measurement and the corresponding analyses are designed according to conventionally used parameters similar to other pharmaceutical studies. (52) A responder analysis is included as secondary analysis to identify possible factors (including biomarkers and symptom-based diagnosis) that could lead to more personalised the use of astragalus. Besides, we conducted a focus group interview series to explore the expectations of patients and clinicians (both conventional and Chinese medicine) to refine the study design for better clinical

1  
2  
3  
4 translation. (51) The major limitation of this trial is the open-label nature. The study subjects  
5  
6  
7 could not be masked due to the nature of treatment. Since the clinical outcomes under  
8  
9  
10 investigation are objective and the outcome assessor is blinded, placebo effect and outcome  
11  
12  
13 measurement bias should be minimised. However, subjective outcomes including quality of  
14  
15  
16 life could not be assessed.  
17  
18  
19  
20  
21  
22  
23  
24  
25  
26  
27  
28  
29  
30  
31  
32  
33  
34  
35  
36  
37  
38  
39  
40  
41  
42  
43  
44  
45  
46  
47  
48  
49  
50  
51  
52  
53  
54  
55  
56  
57  
58  
59  
60

For peer review only

## List of abbreviations

ACEI – angiotensin-converting enzyme inhibitors

ANCOVA – analysis of covariance

ARB – angiotensin II receptor blockers

BMI – body mass index

CI – confidence interval

CM – Chinese medicine

Co-I – co-investigator

CONSORT – Consolidated Standards of Reporting Trials

CTCAE – Common Terminology Criteria for Adverse Events

DKD – diabetic kidney disease

CKD – chronic kidney disease

FBG – fasting blood glucose

GMP – Good Manufacturing Practice

HbA<sub>1c</sub> – haemoglobin A<sub>1c</sub>

MCP-1 – monocyte chemotactic protein 1

NF-κB – nuclear factor kappa-light-chain-enhancer of activated B cells

PI – principal investigator

RA – research assistant

1  
2  
3  
4 RAAS – renin–angiotensin–aldosterone system  
5  
6

7 SAE – serious adverse event  
8  
9

10 TGF- $\beta_1$  – transforming growth factor beta-1  
11  
12

13 UACR – urine albumin-to-creatinine ratio  
14  
15  
16  
17  
18  
19  
20  
21  
22  
23  
24  
25  
26  
27  
28  
29  
30  
31  
32  
33  
34  
35  
36  
37  
38  
39  
40  
41  
42  
43  
44  
45  
46  
47  
48  
49  
50  
51  
52  
53  
54  
55  
56  
57  
58  
59  
60

For peer review only

## DECLARATION

### Ethics approval and consent to participate

This study was approved and monitored by the Institutional Review Board of the University of Hong Kong / Hospital Authority Hong Kong West/East/Kowloon Central clusters (Ref: UW 16-553/HKEC-2019-026/REC (KC/KE)-19-0049/ER-4). Written consent will be obtained from all subjects, including change of protocol. This protocol is prospectively registered on ClinicalTrials.gov (NCT03535935) on 24 May 2018 and reported according to SPIRIT-TCM Extension 2018. SPIRIT checklist and flow diagram are enclosed (**Supplementary File**). We publish this protocol after the first DSMB meeting.

### Consent for Publication

Not applicable. No personal information is included.

### Availability of data and materials

The datasets used and/or analysed during the current study will be available from the corresponding author on reasonable request.

### Competing interests

None declared.

### Funding

This project is made possible in part through the Health and Medical Research Fund (Ref:

1  
2  
3  
4 12133341, 14151731). The funding organisation had no role in the design and conduct of the  
5  
6  
7 study; collection, management, analysis, and interpretation of the data; preparation, review,  
8  
9  
10 or approval of the manuscript; and decision to submit the manuscript for publication.  
11  
12

### 13 **Authors' Contributions**

14  
15  
16 KW Chan and SCW Tang designed the study. KW Chan, AKS Kwong, PN Tsui, SCY  
17  
18 Cheung, GCW Chan, MMY Wong, KCB Tan and WF Choi recruited the patients and  
19  
20 provided clinical consultation. WH Yiu provided expert opinion and support in biochemical  
21  
22 analysis. L Lao, Z Zhang, Y Zhang provided expert opinion on the study design. KW Chan  
23  
24 and SCW Tang drafted the manuscript. All authors involved in the manuscript revision.  
25  
26  
27  
28  
29

### 30 **Acknowledgements**

31  
32  
33 We thank Ms Ka Yan YU and Ms Feona LEUNG for the clinical service; Ms Pearl YAN, Ms  
34  
35 Kam Yan YU, Dr Johnny LAM, Ms Louise PUN, Ms Sally LAM, Ms Ying WONG and Mr  
36  
37 Tommy LEE for the patient coordination and clerical support; Mr Spencer NG from  
38  
39 Information and Technology for the generation and concealment of randomisation sequence;  
40  
41 Ms Janice WONG and C&H Medical Laboratories Ltd. for the independent analysis of  
42  
43 clinical samples; and all clinical and scientific staffs involved in the patient care and sample  
44  
45 analysis. This project is a part of SCHEMATIC Initiative and we thank all the team members  
46  
47 of SCHEMATIC for their contribution. We also thank Prof Vincent CHUNG, Prof Wendy  
48  
49 WONG and Dr Jerry YEUNG for monitoring this trial as DSMB panel members.  
50  
51  
52  
53  
54  
55  
56  
57  
58  
59  
60

## REFERENCES

1. Sinclair A, Saeedi P, Kaundal A, Karuranga S, Malanda B, Williams R. Diabetes and global ageing among 65-99-year-old adults: Findings from the International Diabetes Federation Diabetes Atlas, 9(th) edition. *Diabetes Res Clin Pract.* 2020:108078.
2. Cho NH, Shaw JE, Karuranga S, Huang Y, da Rocha Fernandes JD, Ohlrogge AW, et al. IDF Diabetes Atlas: Global estimates of diabetes prevalence for 2017 and projections for 2045. *Diabetes Res Clin Pract.* 2018;138:271-81.
3. Ogurtsova K, da Rocha Fernandes JD, Huang Y, Linnenkamp U, Guariguata L, Cho NH, et al. IDF Diabetes Atlas: Global estimates for the prevalence of diabetes for 2015 and 2040. *Diabetes Res Clin Pract.* 2017;128:40-50.
4. Thomas MC, Cooper ME, Zimmet P. Changing epidemiology of type 2 diabetes mellitus and associated chronic kidney disease. *Nature Reviews Nephrology.* 2016;12(2):73-81.
5. Tang SCW, Yiu WH. Innate immunity in diabetic kidney disease. *Nature Reviews Nephrology.* 2020;16(4):206-22.
6. Leung CB, Cheung WL, Li PK. Renal registry in Hong Kong-the first 20 years. *Kidney Int Suppl.* 2015;5(1):33-8.
7. Jiao F, Wong CKH, Tang SCW, Fung CSC, Tan KCB, McGhee S, et al. Annual direct medical costs associated with diabetes-related complications in the event year and in

- 1  
2  
3  
4 subsequent years in Hong Kong. *Diabetic Medicine*. 2017;34(9):1276-83.  
5  
6  
7 8. Afkarian M, Sachs MC, Kestenbaum B, Hirsch IB, Tuttle KR, Himmelfarb J, et al.  
8  
9  
10 Kidney disease and increased mortality risk in type 2 diabetes. *J Am Soc Nephrol*.  
11  
12  
13 2013;24(2):302-8.  
14  
15  
16 9. Wen CP, Chang CH, Tsai MK, Lee JH, Lu PJ, Tsai SP, et al. Diabetes with early kidney  
17  
18  
19 involvement may shorten life expectancy by 16 years. *Kidney Int*. 2017;92(2):388-96.  
20  
21  
22 10. Goh SY, Cooper ME. Clinical review: The role of advanced glycation end products in  
23  
24  
25 progression and complications of diabetes. *The Journal of Clinical Endocrinology and*  
26  
27  
28 *Metabolism*. 2008;93(4):1143-52.  
29  
30  
31 11. Forbes JM, Cooper ME, Oldfield MD, Thomas MC. Role of advanced glycation end  
32  
33  
34 products in diabetic nephropathy. *J Am Soc Nephrol*. 2003;14(8 Suppl 3):S254-8.  
35  
36  
37 12. Pichler R, Afkarian M, Dieter BP, Tuttle KR. Immunity and inflammation in diabetic  
38  
39  
40 kidney disease: translating mechanisms to biomarkers and treatment targets. *American*  
41  
42  
43 *Journal of Physiology Renal Physiology*. 2017;312(4):F716-f31.  
44  
45  
46 13. Navarro-Gonzalez JF, Mora-Fernandez C. The role of inflammatory cytokines in  
47  
48  
49 diabetic nephropathy. *J Am Soc Nephrol*. 2008;19(3):433-42.  
50  
51  
52 14. Navarro-Gonzalez JF, Mora-Fernandez C, Muros de Fuentes M, Garcia-Perez J.  
53  
54  
55 Inflammatory molecules and pathways in the pathogenesis of diabetic nephropathy. *Nature*  
56  
57  
58 *Reviews Nephrology*. 2011;7(6):327-40.  
59  
60



- 1  
2  
3  
4 15. Alicic RZ, Rooney MT, Tuttle KR. Diabetic Kidney Disease: Challenges, Progress, and  
5  
6  
7 Possibilities. *Clin J Am Soc Nephrol*. 2017;12(12):2032-45.  
8  
9
- 10 16. Premaratne E, Verma S, Ekinci EI, Theverkalam G, Jerums G, MacIsaac RJ. The impact  
11  
12 of hyperfiltration on the diabetic kidney. *Diabetes & Metabolism*. 2015;41(1):5-17.  
13  
14  
15
- 16 17. Tonneijck L, Muskiet MH, Smits MM, van Bommel EJ, Heerspink HJ, van Raalte DH,  
17  
18 et al. Glomerular Hyperfiltration in Diabetes: Mechanisms, Clinical Significance, and  
19  
20 Treatment. *J Am Soc Nephrol*. 2017;28(4):1023-39.  
21  
22  
23
- 24 18. Palatini P. Glomerular hyperfiltration: a marker of early renal damage in pre-diabetes  
25  
26 and pre-hypertension. *Nephrol Dial Transplant*. 2012;27(5):1708-14.  
27  
28  
29
- 30 19. Yiu WH, Li RX, Wong DWL, Wu HJ, Chan KW, Chan LYY, et al. Complement C5a  
31  
32 inhibition moderates lipid metabolism and reduces tubulointerstitial fibrosis in diabetic  
33  
34 nephropathy. *Nephrol Dial Transplant*. 2018;33(8):1323-32.  
35  
36  
37  
38  
39
- 40 20. Hsu TW, Liu JS, Hung SC, Kuo KL, Chang YK, Chen YC, et al. Renoprotective effect  
41  
42 of renin-angiotensin-aldosterone system blockade in patients with predialysis advanced  
43  
44 chronic kidney disease, hypertension, and anemia. *JAMA Internal Medicine*.  
45  
46 2014;174(3):347-54.  
47  
48  
49
- 50 21. Nistor I, De Sutter J, Drechsler C, Goldsmith D, Soler MJ, Tomson C, et al. Effect of  
51  
52 renin-angiotensin-aldosterone system blockade in adults with diabetes mellitus and advanced  
53  
54 chronic kidney disease not on dialysis: a systematic review and meta-analysis. *Nephrol Dial*  
55  
56  
57  
58  
59  
60

1  
2  
3  
4 *Transplant*. 2018;33(1):12-22.  
5  
6

7 22. Palmer SC, Mavridis D, Navarese E, Craig JC, Tonelli M, Salanti G, et al. Comparative  
8 efficacy and safety of blood pressure-lowering agents in adults with diabetes and kidney  
9  
10 disease: a network meta-analysis. *The Lancet*. 2015;385(9982):2047-56.  
11  
12  
13

14  
15  
16 23. Chan GC, Tang SC. Proteinuria reaffirmed as a risk modifier in diabetic chronic kidney  
17  
18 disease. *Nephrol Dial Transplant*. 2018;33(11):1873-74.  
19  
20

21  
22 24. Chan GC, Tang SC. Diabetic nephropathy: landmark clinical trials and tribulations.  
23  
24  
25 *Nephrol Dial Transplant*. 2016;31(3):359-68.  
26

27  
28 25. Lin MY, Chiu YW, Chang JS, Lin HL, Lee CT, Chiu GF, et al. Association of  
29  
30 prescribed Chinese herbal medicine use with risk of end-stage renal disease in patients with  
31  
32 chronic kidney disease. *Kidney Int*. 2015;5(10):226.  
33  
34  
35

36  
37 26. Hsieh CF, Huang SL, Chen CL, Chen WT, Chang HC, Yang CC. Non-aristolochic acid  
38  
39 prescribed Chinese herbal medicines and the risk of mortality in patients with chronic kidney  
40  
41 disease: results from a population-based follow-up study. *BMJ Open*. 2014;4(2):2013-  
42  
43  
44  
45  
46 004033.  
47

48  
49 27. Li Q, Zhang H, Fei Y, et al, Treatment of Diabetic Nephropathy by Integrative  
50  
51 Medicine: A Multi-center Prospective Cohort Study. *Chinese Journal of Integrated*  
52  
53  
54  
55 *Traditional and Western Medicine*. 2012;32(3):317-21.  
56

57  
58 28. Zhang HW, Lin ZX, Xu C, Leung C, Chan LS. Astragalus (a traditional Chinese  
59  
60

1  
2  
3  
4 medicine) for treating chronic kidney disease. *The Cochrane Database of Systematic*  
5  
6  
7 *Reviews*. 2014;22(10).

8  
9  
10 29. Li M, Wang W, Xue J, Gu Y, Lin S. Meta-analysis of the clinical value of Astragalus  
11  
12 membranaceus in diabetic nephropathy. *Journal of Ethnopharmacology*. 2011;133(2):412-9.

13  
14  
15 30. LIU Yi-hong, TIAN Hao-ming. Effect of Astragaulus Membranaceus on Diabetic  
16  
17 Nephropathy:A Systematic Review. *Chinese Journal of Evidence-Based Medicine*.  
18  
19 2007;7(10):715-27.

20  
21  
22 31. Gui D, Guo Y, Wang F, Liu W, Chen J, Chen Y, et al. Astragaloside IV, a novel  
23  
24 antioxidant, prevents glucose-induced podocyte apoptosis in vitro and in vivo. *PloS One*.  
25  
26 2012;7(6):22.

27  
28  
29 32. Sun L, Li W, Xiong L, Li G, Ma R. Astragaloside IV prevents damage to human  
30  
31 mesangial cells through the inhibition of the NADPH oxidase/ROS/Akt/NFkappaB pathway  
32  
33 under high glucose conditions. *Int J Mol Med*. 2014;34(1):167-76.

34  
35  
36 33. Chan KW, Chan CW, Leung CPS, Yiu WH, Lui SL, Ip TP, et al. Semi-individualised  
37  
38 Chinese Medicine Treatment for Diabetic Kidney Disease – From users' perspectives to  
39  
40 SCHEMATIC trial interim result and potential mechanisms. *Advances in Integrative*  
41  
42 *Medicine*; Brisbane. Australia 2019. S12.

43  
44  
45 34. Chan KW, Ip TP, Kwong AS, Lui SL, Chan GC, Cowling BJ, et al. Semi-individualised  
46  
47 Chinese medicine treatment as an adjuvant management for diabetic nephropathy: a pilot  
48  
49  
50  
51  
52  
53  
54  
55  
56  
57  
58  
59  
60

1  
2  
3  
4 add-on, randomised, controlled, multicentre, open-label pragmatic clinical trial. *BMJ Open*.

5  
6  
7 2016;6(8):e010741.

8  
9  
10 35. World Health Organisation. General guidelines for methodologies on research and  
11  
12  
13 evaluation of traditional medicine Geneva: World Health Organisation; 2000.

14  
15  
16 36. Levey AS, Bosch JP, Lewis JB, Greene T, Rogers N, Roth D. A more accurate method  
17  
18  
19 to estimate glomerular filtration rate from serum creatinine: a new prediction equation.

20  
21  
22 Modification of Diet in Renal Disease Study Group. *Ann Intern Med*. 1999;130(6):461-70.

23  
24  
25 37. Glasscock RJ, Warnock DG, Delanaye P. The global burden of chronic kidney disease:  
26  
27  
28 estimates, variability and pitfalls. *Nature Reviews Nephrology*. 2017;13(2):104-14.

29  
30  
31 38. Sim J, Lewis M. The size of a pilot study for a clinical trial should be calculated in  
32  
33  
34 relation to considerations of precision and efficiency. *J Clin Epidemiol*. 2012;65(3):301-8.

35  
36  
37 39. Moore CG, Carter RE, Nietert PJ, Stewart PW. Recommendations for planning pilot  
38  
39  
40 studies in clinical and translational research. *Clinical and Translational Science*.

41  
42  
43 2011;4(5):332-7.

44  
45  
46 40. Pavlou M, Ambler G, Seaman SR, Guttman O, Elliott P, King M, et al. How to develop  
47  
48  
49 a more accurate risk prediction model when there are few events. *BMJ*. 2015;11(351).

50  
51  
52 41. Li BC. The Combined Treatment of Astragalus and Vasartan for Early Stage Diabetic  
53  
54  
55 Kidney Disease. *China Foreign Medical Treatment*. 2011(23):98-100.

56  
57  
58 42. Huang H, Gao J. Astragalus Pharmacological Properties and Use of Research in  
59  
60

1  
2  
3  
4 Diabetic Nephropathy. *Journal of Practical Traditional Chinese Internal Medicine*.

5  
6  
7 2011;25(10):80-2.  
8  
9

10 43. Cheng CW, Wu TX, Shang HC, Li YP, Altman DG, Moher D, et al. CONSORT

11  
12 Extension for Chinese Herbal Medicine Formulas 2017: Recommendations, Explanation, and

13  
14  
15 Elaboration. *Ann Intern Med*. 2017;167(2):112-121.  
16  
17

18  
19 44. Krolewski AS, Skupien J, Rossing P, Warram JH. Fast renal decline to end-stage renal

20  
21  
22 disease: an unrecognized feature of nephropathy in diabetes. *Kidney Int*. 2017;91(6):1300-11.  
23  
24

25 45. Looker HC, Colombo M, Hess S, Brosnan MJ, Farran B, Dalton RN, et al. Biomarkers

26  
27  
28 of rapid chronic kidney disease progression in type 2 diabetes. *Kidney Int*. 2015;88(4):888-

29  
30  
31 96.  
32  
33

34 46. Zheng X. Guiding Principle of Clinical Research on New Drugs of Chinese Medicine

35  
36  
37 (Trial). Beijing: China Medical Science Press; 2002.  
38  
39

40 47. Umanath K, Lewis JB. Update on Diabetic Nephropathy: Core Curriculum 2018.

41  
42  
43 *American journal of kidney diseases*. 2018;71(6):884-95.  
44  
45

46 48. Chan KW. Integrative management for diabetic kidney disease – Patients' and

47  
48  
49 clinicians' perspectives, clinical effectiveness and possible mechanisms [PhD thesis]. Hong

50  
51  
52 Kong: The University of Hong Kong; 2018.  
53  
54

55 49. Ma YC, Zuo L, Chen JH, Luo Q, Yu XQ, Li Y, et al. Modified glomerular filtration rate

56  
57  
58 estimating equation for Chinese patients with chronic kidney disease. *J Am Soc Nephrol*.  
59  
60

1  
2  
3  
4 2006;17(10):2937-44.  
5

6  
7 50. Levey AS, Stevens LA, Schmid CH, Zhang YL, Castro AF, 3rd, Feldman HI, et al. A  
8  
9 new equation to estimate glomerular filtration rate. *Ann Intern Med.* 2009;150(9):604-12.  
10  
11

12  
13 51. Chan KW, Lee PW, Leung CPS, Chan GCW, Yiu WH, Cheung HM, et al. Patients' and  
14  
15 clinicians' expectations on integrative medicine services for diabetes: a focus group study.  
16  
17  
18  
19 *BMC Complementary Medicine and Therapies.* 2020;20(1):205  
20  
21

22 52. Heerspink HJL, Parving HH, Andress DL, Bakris G, Correa-Rotter R, Hou FF, et al.  
23  
24 Atrasentan and renal events in patients with type 2 diabetes and chronic kidney disease  
25  
26 (SONAR): a double-blind, randomised, placebo-controlled trial. *Lancet.*  
27  
28  
29  
30  
31 2019;393(10184):1937-47.  
32  
33  
34  
35  
36  
37  
38  
39  
40  
41  
42  
43  
44  
45  
46  
47  
48  
49  
50  
51  
52  
53  
54  
55  
56  
57  
58  
59  
60

1  
2  
3  
4 **Figure legends**  
5

6  
7 **Figure 1 The Flow of Research**  
8  
9  
10  
11  
12  
13  
14  
15  
16  
17  
18  
19  
20  
21  
22  
23  
24  
25  
26  
27  
28  
29  
30  
31  
32  
33  
34  
35  
36  
37  
38  
39  
40  
41  
42  
43  
44  
45  
46  
47  
48  
49  
50  
51  
52  
53  
54  
55  
56  
57  
58  
59  
60

For peer review only

**Table 1 Follow-up schedule**

| Timepoint                                                                | STUDY PERIOD     |               |                                    |                              |                                    |
|--------------------------------------------------------------------------|------------------|---------------|------------------------------------|------------------------------|------------------------------------|
|                                                                          | Enrolment        | Allocation    | Post allocation – treatment period |                              |                                    |
|                                                                          | Before treatment | Week 0, Day 1 | Week 1-4 (+/- 3 days)              | After 4-6 weeks (+/- 7 days) | After 24 and 48 weeks (+/- 7 days) |
| <b>ENROLMENT</b>                                                         |                  |               |                                    |                              |                                    |
| Eligibility screen                                                       | X                |               |                                    |                              |                                    |
| Informed consent                                                         | X                |               |                                    |                              |                                    |
| Medical history                                                          | X                |               |                                    |                              |                                    |
| Allocation                                                               |                  | X             |                                    |                              |                                    |
| <b>INTERVENTIONS</b>                                                     |                  |               |                                    |                              |                                    |
| Intervention (interventional group)                                      |                  | X             | X                                  | X                            | X                                  |
| Routine care (all patients)                                              |                  | X             | X                                  | X                            | X                                  |
| <b>ASSESSMENTS</b>                                                       |                  |               |                                    |                              |                                    |
| Renal and liver function tests, other biomarkers (blood and urine tests) | X                |               | X                                  | X                            | X                                  |
| Blood pressure, weight, hip-waist circumference                          |                  | X             | X                                  | X                            | X                                  |
| Demographics                                                             |                  | X             |                                    |                              |                                    |
| Clinical presentations                                                   |                  | X             | X                                  | X                            | X                                  |
| Adverse events                                                           |                  | X             | X                                  | X                            | X                                  |



## Appendix 1. World Health Organisation Trial Registration Dataset

| Data Category                                        | Information                                                                                                                                                                                                                                                                        |
|------------------------------------------------------|------------------------------------------------------------------------------------------------------------------------------------------------------------------------------------------------------------------------------------------------------------------------------------|
| <b>Primary Registry and Trial Identifying Number</b> | ClinicalTrials.gov (NCT03535935)                                                                                                                                                                                                                                                   |
| <b>Date of Registration in Primary Registry</b>      | 24 May 2018                                                                                                                                                                                                                                                                        |
| <b>Secondary Identifying Numbers</b>                 | HMRF-14151731                                                                                                                                                                                                                                                                      |
| <b>Source(s) of Monetary or Material Support</b>     | Health and Medical Research Fund, Food and Health Bureau, Hong Kong                                                                                                                                                                                                                |
| <b>Primary Sponsor</b>                               | The University of Hong Kong                                                                                                                                                                                                                                                        |
| <b>Secondary Sponsor(s)</b>                          | N/A                                                                                                                                                                                                                                                                                |
| <b>Contact for Public Queries</b>                    | Prof TANG Chi-wai Sydney MD PhD<br><br>Dr CHAN Kam-wa MSPH MD PhD<br><br>Tel: +852 2255 3603<br><br>Email: <a href="mailto:scwtang@hku.hk">scwtang@hku.hk</a> / <a href="mailto:chriskwc@hku.hk">chriskwc@hku.hk</a>                                                               |
| <b>Public Title</b>                                  | Efficacy, Safety and Response Predictors of Adjuvant Astragalus Therapy for Diabetic Kidney Disease (READY)                                                                                                                                                                        |
| <b>Scientific Title</b>                              | Efficacy, Safety and Response Predictors of Adjuvant Astragalus for Diabetic Kidney Disease (READY) – An Add-on, Assessor-blind, Parallel, Pragmatic Randomised Controlled Trial                                                                                                   |
| <b>Countries of Recruitment</b>                      | Hong Kong SAR, China                                                                                                                                                                                                                                                               |
| <b>Health Condition(s) or Problem(s) Studied</b>     | Diabetic kidney disease                                                                                                                                                                                                                                                            |
| <b>Intervention (s)</b>                              | Active comparator: Standard medical care with angiotensin converting enzyme inhibitor or angiotensin receptor blocker and oral hypoglycemic agents and/or insulin at stable dose<br><br>Experimental arm: Semi-individualised dosage of astragalus on top of standard medical care |
| <b>Key Inclusion and Exclusion Criteria</b>          | Ages eligible for study: between 35 and 80 years old<br><br>Gender eligible for study: Both                                                                                                                                                                                        |

|                                                                                                                                                                                                                                                                                                                                                             |                                                                                                                                                                                                                                                                                                                                                                                                                                                                                                                                                                                                                                                                                                                                                                                                                                                                                                                                                                                                                                                                                                                                                                                                                                                                                                                                                                                                                                                                                                                                                                             |
|-------------------------------------------------------------------------------------------------------------------------------------------------------------------------------------------------------------------------------------------------------------------------------------------------------------------------------------------------------------|-----------------------------------------------------------------------------------------------------------------------------------------------------------------------------------------------------------------------------------------------------------------------------------------------------------------------------------------------------------------------------------------------------------------------------------------------------------------------------------------------------------------------------------------------------------------------------------------------------------------------------------------------------------------------------------------------------------------------------------------------------------------------------------------------------------------------------------------------------------------------------------------------------------------------------------------------------------------------------------------------------------------------------------------------------------------------------------------------------------------------------------------------------------------------------------------------------------------------------------------------------------------------------------------------------------------------------------------------------------------------------------------------------------------------------------------------------------------------------------------------------------------------------------------------------------------------------|
| 1<br>2<br>3<br>4<br>5<br>6<br>7<br>8<br>9<br>10<br>11<br>12<br>13<br>14<br>15<br>16<br>17<br>18<br>19<br>20<br>21<br>22<br>23<br>24<br>25<br>26<br>27<br>28<br>29<br>30<br>31<br>32<br>33<br>34<br>35<br>36<br>37<br>38<br>39<br>40<br>41<br>42<br>43<br>44<br>45<br>46<br>47<br>48<br>49<br>50<br>51<br>52<br>53<br>54<br>55<br>56<br>57<br>58<br>59<br>60 | <p>Healthy volunteers: Not accepted</p> <p><b>Inclusion Criteria:</b></p> <ul style="list-style-type: none"><li>- diagnosed with type 2 diabetes for at least 5 years;</li><li>- with an estimated glomerular filtration rate (GFR) <math>\geq 30</math> &lt;90 mL/min/1.73m<sup>2</sup> confirmed with repeat testing over three or more months calculated by the abbreviated MDRD study equation;</li><li>- persistent macroalbuminuria with spot urine albumin-to-creatinine ratio (UACR) <math>\geq 300</math> mg/g confirmed by at least 2 out of 3 consecutive first morning void urine samples;</li><li>- on stable dose of anti-diabetic drug including insulin for 12 weeks;</li><li>- on stable dose of angiotensin-converting-enzyme inhibitor or angiotensin receptor blocker for 12 weeks; and</li><li>- willing and able to give written informed consent</li></ul> <p><b>Exclusion Criteria:</b></p> <ul style="list-style-type: none"><li>- with known history of glomerulonephritis, polycystic kidney disease, systemic lupus erythematosus, any suggestive evidence of nondiabetic glomerulopathy;</li><li>- with known history of kidney transplant;</li><li>- with concurrent severe disorders of heart, brain, liver, and hematopoietic system, tumor and mental disorder;</li><li>- with deranged liver function;</li><li>- with poorly controlled blood pressure;</li><li>- with known history of intolerance or malabsorption of oral medications;</li><li>- with uncontrollable urinary infection;</li><li>- experiencing pregnancy; or</li></ul> |
|-------------------------------------------------------------------------------------------------------------------------------------------------------------------------------------------------------------------------------------------------------------------------------------------------------------------------------------------------------------|-----------------------------------------------------------------------------------------------------------------------------------------------------------------------------------------------------------------------------------------------------------------------------------------------------------------------------------------------------------------------------------------------------------------------------------------------------------------------------------------------------------------------------------------------------------------------------------------------------------------------------------------------------------------------------------------------------------------------------------------------------------------------------------------------------------------------------------------------------------------------------------------------------------------------------------------------------------------------------------------------------------------------------------------------------------------------------------------------------------------------------------------------------------------------------------------------------------------------------------------------------------------------------------------------------------------------------------------------------------------------------------------------------------------------------------------------------------------------------------------------------------------------------------------------------------------------------|

|                                 |                                                                                                                                                                                                                                                                                                                                                                                                       |
|---------------------------------|-------------------------------------------------------------------------------------------------------------------------------------------------------------------------------------------------------------------------------------------------------------------------------------------------------------------------------------------------------------------------------------------------------|
|                                 | - participating in other clinical trial within 30 days                                                                                                                                                                                                                                                                                                                                                |
| <b>Study Type</b>               | Interventional<br><br>Allocation: randomised<br><br>Intervention model: parallel assignment (2 arms)<br><br>Masking: Open label (Assessor of primary outcome measures blinded)<br><br>Primary purpose: Treatment<br><br>Phase: II/III<br><br>Allocation concealment: Sealed opaque envelope prepared by an independent technical staff<br><br>Sequence generation: computer generated random sequence |
| <b>Date of First Enrollment</b> | July 2018                                                                                                                                                                                                                                                                                                                                                                                             |
| <b>Target Sample Size</b>       | 118                                                                                                                                                                                                                                                                                                                                                                                                   |
| <b>Recruitment Status</b>       | Recruiting                                                                                                                                                                                                                                                                                                                                                                                            |
| <b>Primary Outcome(s)</b>       | Changes in estimated glomerular filtration rate and spot urine to albumin ratio (time frame: 48 weeks)                                                                                                                                                                                                                                                                                                |
| <b>Key Secondary Outcome(s)</b> | Adverse events, changes in fasting blood glucose, glycated haemoglobin, lipids, blood pressure                                                                                                                                                                                                                                                                                                        |

## Appendix 2. Sample Consent form

### Patient/Subject Information Sheet

#### 1. STUDY TITLE

Efficacy, safety and response predictors of adjuvant astragalus for diabetic kidney disease (READY) – An open-label randomised controlled trial with responder regression analysis

#### 2. INVITATION PARAGRAPH

You are being invited to take part in a research study. Before you decide it is important for you to understand why the research is being done and what it will involve. Please take time to read the following information carefully and discuss it with friends, relatives and your family doctor if you wish to. Ask us if there is anything that is not clear or if you would like more information. Take time to decide whether or not you wish to take part.

#### 3. WHAT IS THE PURPOSE OF THE STUDY?

Modern pharmacologic therapy using blockers of angiotensin II is unable to fully suppress the progression of chronic kidney disease (CKD). As a result, many patients progress to end-stage kidney disease and require either dialysis or transplantation. Recently, research data shows that astragalus has anti-fibrotic effect, slower the progression to kidney disease and have been using in addition to routine medical care in Hong Kong. However, the actual pharmacological and therapeutic effect of astragalus are unclear. The present study lasting 48 weeks aims to investigate whether astragalus consumption stabilises renal function and reduces albuminuria.

#### 4. WHY HAVE I BEEN CHOSEN?

You have CKD with unsatisfactory proteinuria control despite angiotensin blockade therapy, and are now being invited to participate in this study to investigate the potential beneficial effect of astragalus that is currently widely used in Hong Kong.

#### 5. DO I HAVE TO TAKE PART?

It is up to you to decide whether or not to take part. If you do decide to take part you will be given this information sheet to keep and be asked to sign a consent form. If you decide to take part you are still free to withdraw at any time and without giving a reason. This will not affect the standard of care you receive.

## 6. WHAT WILL HAPPEN TO ME IF I TAKE PART?

You will be randomised by computer after thorough assessment to either receive guidance on astragalus consumption in addition to your standard medications or continue standard medications. The observation period of this study is 48 weeks, and you will be followed up at the clinic in the usual manner, but with additional blood and urine tests as appropriate. You will need to attend 6 extra clinic visits for Chinese medicine consultation in addition to your usual visits over the next 48 weeks.

## 7. WHAT DO I HAVE TO DO?

There are no lifestyle restrictions by participating in this study, except for the need of practicing contraception. As you have CKD, you will be given dietary advice on salt and protein restriction which are necessary even if you are not participating in this study. You will take the astragalus on top of your therapy for your present condition.

## 8. WHAT IS THE DRUG OR PROCEDURE THAT IS BEING TESTED?

Astragalus has been widely consumed for years in Hong Kong although with limited clinical evidence. According to existing best available evidence, astragalus has anti-fibrotic effect and could slower the progression to kidney disease. Currently, no adverse events have been confirmed to associate with the use of astragalus.

## 9. WHAT ARE THE ALTERNATIVES FOR DIAGNOSIS OR TREATMENT?

An alternative treatment option of chronic kidney disease is standard medical care with angiotensin receptor blocker or angiotensin converting enzyme inhibitor alone.

## 10. WHAT ARE THE SIDE EFFECTS OF TAKING PART?

Astragalus is generally well tolerated. There are no known side effects in addition to those of conventional treatment when astragalus is being used within the reference range of Pharmacopeia of China. Nevertheless, astragalus may have unknown side effects. Full evaluation will be performed and adequate monitoring will be exercised once you start taking it. You will need to attend 6 extra clinic visits in addition to your usual visits over the next 48 weeks. Any claims on loss or injury attributable to the study will be arranged by the University of Hong Kong.

## 11. WHAT ARE THE DISADVANTAGES AND RISKS OF TAKING PART?

The safety of the astragalus to the human fetus is unclear, therefore women with child-bearing potential must practice contraception.

## 12. WHAT ARE THE BENEFITS OF TAKING PART?

We hope that astragalus will help you. However, this cannot be guaranteed. The information we get from this study may help us treat future patients with CKD better.

## 13. WHAT IF NEW INFORMATION BECOMES AVAILABLE?

Sometimes during the course of a research project, new information becomes available about astragalus that is being studied. If this happens, your research doctor will tell you about it and discuss with you whether you want to continue in the study. If you decide to withdraw your research doctor will make arrangements for your care to continue. If you decide to continue in the study you will be asked to sign an updated consent form.

## 14. WHAT HAPPENS WHEN THE RESEARCH STUDY STOPS?

After the study stops, you will be advised whether or not to continue with astragalus according to clinical need. Astragalus will not be provided for free.

## 15. WHAT IF SOMETHING GOES WRONG?

Any claims on loss or injury attributable to the study will be arranged by the University of Hong Kong. If you are harmed due to someone's negligence, then you may have grounds for a legal action. Regardless of this, if you wish to complain about any aspect of the way you have been approached or treated during the course of this study, the normal health service complaints mechanisms may be available to you.

## 16. WILL MY TAKING PART IN THIS STUDY BE KEPT CONFIDENTIAL?

You have the rights of access to personal data and publicly available study results, if and when needed.

Under the laws of Hong Kong (in particular the Personal Data (Privacy) Ordinance, Cap 486), you enjoy or may enjoy rights for the protection of the confidentiality of your personal data, such as those regarding the collection, custody, retention, management, control, use (including analysis or comparison), transfer in or out of Hong Kong, non-disclosure, erasure and/or in any way dealing with or disposing of any of your personal data in or for this study. For any query, you should consult the Privacy Commissioner for Privacy Data or his office (Tel No. 2827 2827) as to the proper monitoring or supervision of your personal data protection so that your full awareness and understanding of the significance of compliance with the law governing privacy data is assured.

By consenting to participate in this study, you expressly authorize:

- the principal investigator and his research team and the ethics committee responsible for overseeing this study to get access to, to use, and to retain your personal data for the purposes and in the manner described in this informed consent process; and
- the relevant government agencies (e.g. the Hong Kong Department of Health) to get access to your personal data for the purposes of checking and verifying the integrity of study data and assessing compliance with the study protocol and relevant requirements.

#### **17. WHAT WILL HAPPEN TO THE RESULTS OF THE RESEARCH STUDY?**

The results of this study will be published in a medical journal. Your personal information will be kept confidential.

#### **18. WHO IS ORGANISING AND FUNDING THE RESEARCH?**

This study is supported by the Health and Medical Research Fund and you do not need to pay any extra cost. Your doctor will not be paid for including you in this study.

#### **19. WHO HAS REVIEWED THE STUDY?**

The Institutional Review Board of The University of Hong Kong/Hospital Authority Hong Kong West Cluster has reviewed and approved this study. After recruitment, Each patient will receive HK\$150 for each blood/urine investigation visit related to this study as travel support.

#### **20. CONTACT FOR FURTHER INFORMATION**

In case of enquiry, you may contact Mr Chris Chan or Prof Sydney Tang at 2255 3207. You will be given a copy of this information sheet and a signed consent form to keep. Thank you for taking part in this study!

**From the Division of Nephrology  
Department of Medicine  
University of Hong Kong  
Queen Mary Hospital**

**PATIENT/SUBJECT CONSENT FORM**

**Title of Project:** Efficacy, safety and response predictors of adjuvant astragalus for diabetic kidney disease (READY) – An open-label randomised controlled trial with responder regression analysis

**Name of Researcher:** Prof Sydney C.W. Tang

Please initial box

1. I confirm that I have read and understood the information sheet dated \_\_\_/\_\_\_/\_\_\_ for the above study and have had the opportunity to ask questions.
2. I understand that my participation is voluntary and that I am free to withdraw at any time, without giving any reason, without my medical care or legal rights being affected.
3. I understand that sections of any of my medical notes may be looked at by responsible individuals from regulatory authorities where it is relevant to my taking part in research. I give permission for these individuals to have access to my records.
4. I agree to take part in the above study.

\_\_\_\_\_  
*Name of patient*

\_\_\_\_\_  
*Date*

\_\_\_\_\_  
*Signature*

\_\_\_\_\_  
*Name of Witness (if applicable)*

\_\_\_\_\_  
*Date*

\_\_\_\_\_  
*Signature*

\_\_\_\_\_  
*Name of person taking consent (if different from researcher)*

\_\_\_\_\_  
*Date*

\_\_\_\_\_  
*Signature*

\_\_\_\_\_  
*Researcher*

\_\_\_\_\_  
*Date*

\_\_\_\_\_  
*Signature*

**Copies to:**

- Patient/Subject
- Researcher's File
- Hospital Record



Figure 1. Flow of study

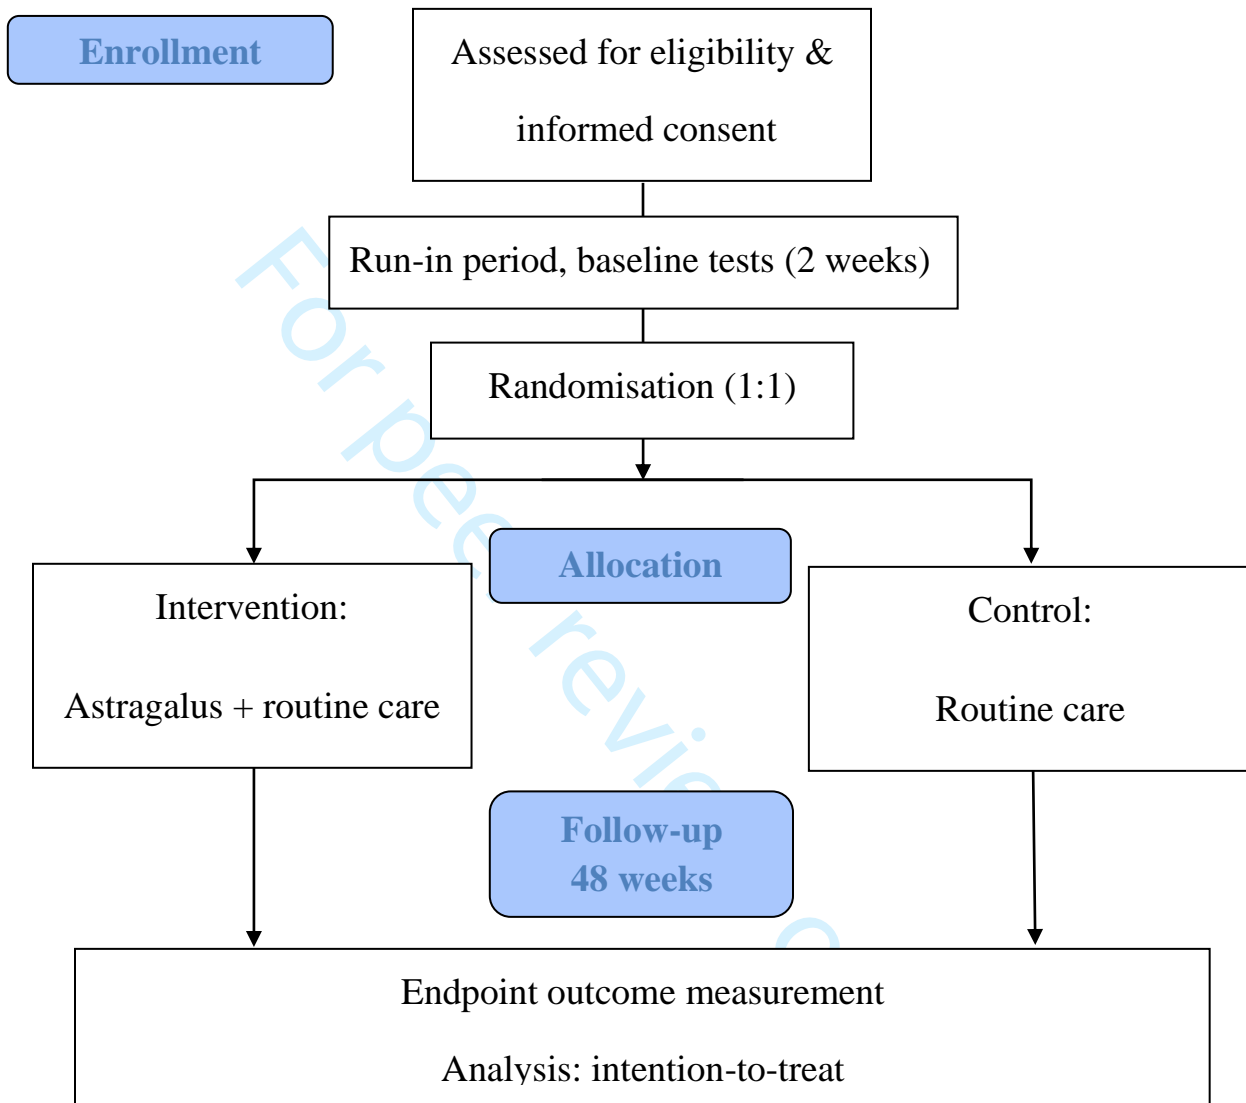

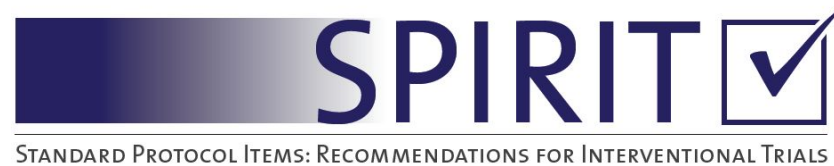

SPIRIT 2013 Checklist: Recommended items to address in a clinical trial protocol and related documents\*

| Section/item                      | Item No | Description                                                                                                                                                                                                                                                                              | Addressed on page number |
|-----------------------------------|---------|------------------------------------------------------------------------------------------------------------------------------------------------------------------------------------------------------------------------------------------------------------------------------------------|--------------------------|
| <b>Administrative information</b> |         |                                                                                                                                                                                                                                                                                          |                          |
| Title                             | 1       | Descriptive title identifying the study design, population, interventions, and, if applicable, trial acronym                                                                                                                                                                             | ___ 1 ___                |
| Trial registration                | 2a      | Trial identifier and registry name. If not yet registered, name of intended registry                                                                                                                                                                                                     | ___ 4 ___                |
|                                   | 2b      | All items from the World Health Organization Trial Registration Data Set                                                                                                                                                                                                                 | ___ Appendix ___         |
| Protocol version                  | 3       | Date and version identifier                                                                                                                                                                                                                                                              | ___ Appendix ___         |
| Funding                           | 4       | Sources and types of financial, material, and other support                                                                                                                                                                                                                              | ___ Appendix ___         |
| Roles and responsibilities        | 5a      | Names, affiliations, and roles of protocol contributors                                                                                                                                                                                                                                  | ___ Appendix ___         |
|                                   | 5b      | Name and contact information for the trial sponsor                                                                                                                                                                                                                                       | ___ Appendix ___         |
|                                   | 5c      | Role of study sponsor and funders, if any, in study design; collection, management, analysis, and interpretation of data; writing of the report; and the decision to submit the report for publication, including whether they will have ultimate authority over any of these activities | ___ 26, 27 ___           |
|                                   | 5d      | Composition, roles, and responsibilities of the coordinating centre, steering committee, endpoint adjudication committee, data management team, and other individuals or groups overseeing the trial, if applicable (see Item 21a for data monitoring committee)                         | ___ 17, 27 ___           |

|    |                                                           |     |                                                                                                               |                       |
|----|-----------------------------------------------------------|-----|---------------------------------------------------------------------------------------------------------------|-----------------------|
| 1  | <b>Introduction</b>                                       |     |                                                                                                               |                       |
| 2  |                                                           |     |                                                                                                               |                       |
| 3  | Background and                                            | 6a  | Description of research question and justification for undertaking the trial, including summary of relevant   | ___ 8-10 ___          |
| 4  | rationale                                                 |     | studies (published and unpublished) examining benefits and harms for each intervention                        |                       |
| 5  |                                                           |     |                                                                                                               |                       |
| 6  |                                                           | 6b  | Explanation for choice of comparators                                                                         | ___ 10, 14 ___        |
| 7  |                                                           |     |                                                                                                               |                       |
| 8  | Objectives                                                | 7   | Specific objectives or hypotheses                                                                             | ___ 10 ___            |
| 9  |                                                           |     |                                                                                                               |                       |
| 10 | Trial design                                              | 8   | Description of trial design including type of trial (eg, parallel group, crossover, factorial, single group), |                       |
| 11 |                                                           |     | allocation ratio, and framework (eg, superiority, equivalence, noninferiority, exploratory)                   | ___ 1, 10 ___         |
| 12 |                                                           |     |                                                                                                               |                       |
| 13 |                                                           |     |                                                                                                               |                       |
| 14 | <b>Methods: Participants, interventions, and outcomes</b> |     |                                                                                                               |                       |
| 15 |                                                           |     |                                                                                                               |                       |
| 16 | Study setting                                             | 9   | Description of study settings (eg, community clinic, academic hospital) and list of countries where data will | ___ 13 ___            |
| 17 |                                                           |     | be collected. Reference to where list of study sites can be obtained                                          |                       |
| 18 |                                                           |     |                                                                                                               |                       |
| 19 | Eligibility criteria                                      | 10  | Inclusion and exclusion criteria for participants. If applicable, eligibility criteria for study centres and  | ___ 10, 11, 15 ___    |
| 20 |                                                           |     | individuals who will perform the interventions (eg, surgeons, psychotherapists)                               |                       |
| 21 |                                                           |     |                                                                                                               |                       |
| 22 | Interventions                                             | 11a | Interventions for each group with sufficient detail to allow replication, including how and when they will be | ___ 14, 15 ___        |
| 23 |                                                           |     | administered                                                                                                  |                       |
| 24 |                                                           |     |                                                                                                               |                       |
| 25 |                                                           | 11b | Criteria for discontinuing or modifying allocated interventions for a given trial participant (eg, drug dose  | ___ 14, 17, 18 ___    |
| 26 |                                                           |     | change in response to harms, participant request, or improving/worsening disease)                             |                       |
| 27 |                                                           |     |                                                                                                               |                       |
| 28 |                                                           | 11c | Strategies to improve adherence to intervention protocols, and any procedures for monitoring adherence        | ___ 17 ___            |
| 29 |                                                           |     | (eg, drug tablet return, laboratory tests)                                                                    |                       |
| 30 |                                                           |     |                                                                                                               |                       |
| 31 |                                                           | 11d | Relevant concomitant care and interventions that are permitted or prohibited during the trial                 | ___ 14 ___            |
| 32 |                                                           |     |                                                                                                               |                       |
| 33 | Outcomes                                                  | 12  | Primary, secondary, and other outcomes, including the specific measurement variable (eg, systolic blood       | ___ 15 ___            |
| 34 |                                                           |     | pressure), analysis metric (eg, change from baseline, final value, time to event), method of aggregation (eg, |                       |
| 35 |                                                           |     | median, proportion), and time point for each outcome. Explanation of the clinical relevance of chosen         |                       |
| 36 |                                                           |     | efficacy and harm outcomes is strongly recommended                                                            |                       |
| 37 |                                                           |     |                                                                                                               |                       |
| 38 | Participant timeline                                      | 13  | Time schedule of enrolment, interventions (including any run-ins and washouts), assessments, and visits for   | ___ Figure 1, Table 1 |
| 39 |                                                           |     | participants. A schematic diagram is highly recommended (see Figure)                                          |                       |
| 40 |                                                           |     |                                                                                                               |                       |
| 41 |                                                           |     |                                                                                                               |                       |
| 42 |                                                           |     |                                                                                                               |                       |
| 43 |                                                           |     |                                                                                                               |                       |
| 44 |                                                           |     |                                                                                                               |                       |
| 45 |                                                           |     |                                                                                                               |                       |
| 46 |                                                           |     |                                                                                                               |                       |

|   |             |    |                                                                                                                                                                                       |              |
|---|-------------|----|---------------------------------------------------------------------------------------------------------------------------------------------------------------------------------------|--------------|
| 1 | Sample size | 14 | Estimated number of participants needed to achieve study objectives and how it was determined, including clinical and statistical assumptions supporting any sample size calculations | ___11, 12___ |
| 2 |             |    |                                                                                                                                                                                       |              |
| 3 |             |    |                                                                                                                                                                                       |              |
| 4 | Recruitment | 15 | Strategies for achieving adequate participant enrolment to reach target sample size                                                                                                   | ___13, 17___ |
| 5 |             |    |                                                                                                                                                                                       |              |

## 6 **Methods: Assignment of interventions (for controlled trials)**

### 7 Allocation:

|    |                    |     |                                                                                                                                                                                                                                                                                                                                                          |                |
|----|--------------------|-----|----------------------------------------------------------------------------------------------------------------------------------------------------------------------------------------------------------------------------------------------------------------------------------------------------------------------------------------------------------|----------------|
| 8  |                    |     |                                                                                                                                                                                                                                                                                                                                                          |                |
| 9  |                    |     |                                                                                                                                                                                                                                                                                                                                                          |                |
| 10 | Sequence           | 16a | Method of generating the allocation sequence (eg, computer-generated random numbers), and list of any factors for stratification. To reduce predictability of a random sequence, details of any planned restriction (eg, blocking) should be provided in a separate document that is unavailable to those who enrol participants or assign interventions | ___13, 14___   |
| 11 | generation         |     |                                                                                                                                                                                                                                                                                                                                                          |                |
| 12 |                    |     |                                                                                                                                                                                                                                                                                                                                                          |                |
| 13 |                    |     |                                                                                                                                                                                                                                                                                                                                                          |                |
| 14 |                    |     |                                                                                                                                                                                                                                                                                                                                                          |                |
| 15 |                    |     |                                                                                                                                                                                                                                                                                                                                                          |                |
| 16 | Allocation         | 16b | Mechanism of implementing the allocation sequence (eg, central telephone; sequentially numbered, opaque, sealed envelopes), describing any steps to conceal the sequence until interventions are assigned                                                                                                                                                | ___13, 14___   |
| 17 | concealment        |     |                                                                                                                                                                                                                                                                                                                                                          |                |
| 18 | mechanism          |     |                                                                                                                                                                                                                                                                                                                                                          |                |
| 19 |                    |     |                                                                                                                                                                                                                                                                                                                                                          |                |
| 20 | Implementation     | 16c | Who will generate the allocation sequence, who will enrol participants, and who will assign participants to interventions                                                                                                                                                                                                                                | __13, 14, 26__ |
| 21 |                    |     |                                                                                                                                                                                                                                                                                                                                                          |                |
| 22 |                    |     |                                                                                                                                                                                                                                                                                                                                                          |                |
| 23 |                    |     |                                                                                                                                                                                                                                                                                                                                                          |                |
| 24 | Blinding (masking) | 17a | Who will be blinded after assignment to interventions (eg, trial participants, care providers, outcome assessors, data analysts), and how                                                                                                                                                                                                                | ___14___       |
| 25 |                    |     |                                                                                                                                                                                                                                                                                                                                                          |                |
| 26 |                    |     |                                                                                                                                                                                                                                                                                                                                                          |                |
| 27 |                    | 17b | If blinded, circumstances under which unblinding is permissible, and procedure for revealing a participant's allocated intervention during the trial                                                                                                                                                                                                     | ___14___       |
| 28 |                    |     |                                                                                                                                                                                                                                                                                                                                                          |                |
| 29 |                    |     |                                                                                                                                                                                                                                                                                                                                                          |                |
| 30 |                    |     |                                                                                                                                                                                                                                                                                                                                                          |                |

## 31 **Methods: Data collection, management, and analysis**

|    |                 |     |                                                                                                                                                                                                                                                                                                                                                                                                              |              |
|----|-----------------|-----|--------------------------------------------------------------------------------------------------------------------------------------------------------------------------------------------------------------------------------------------------------------------------------------------------------------------------------------------------------------------------------------------------------------|--------------|
| 32 |                 |     |                                                                                                                                                                                                                                                                                                                                                                                                              |              |
| 33 | Data collection | 18a | Plans for assessment and collection of outcome, baseline, and other trial data, including any related processes to promote data quality (eg, duplicate measurements, training of assessors) and a description of study instruments (eg, questionnaires, laboratory tests) along with their reliability and validity, if known. Reference to where data collection forms can be found, if not in the protocol | ___16, 17___ |
| 34 | methods         |     |                                                                                                                                                                                                                                                                                                                                                                                                              |              |
| 35 |                 |     |                                                                                                                                                                                                                                                                                                                                                                                                              |              |
| 36 |                 |     |                                                                                                                                                                                                                                                                                                                                                                                                              |              |
| 37 |                 |     |                                                                                                                                                                                                                                                                                                                                                                                                              |              |
| 38 |                 |     |                                                                                                                                                                                                                                                                                                                                                                                                              |              |
| 39 |                 | 18b | Plans to promote participant retention and complete follow-up, including list of any outcome data to be collected for participants who discontinue or deviate from intervention protocols                                                                                                                                                                                                                    | ___17___     |
| 40 |                 |     |                                                                                                                                                                                                                                                                                                                                                                                                              |              |
| 41 |                 |     |                                                                                                                                                                                                                                                                                                                                                                                                              |              |
| 42 |                 |     |                                                                                                                                                                                                                                                                                                                                                                                                              |              |

|    |                                 |     |                                                                                                                                                                                                                                                                                                                                       |                  |
|----|---------------------------------|-----|---------------------------------------------------------------------------------------------------------------------------------------------------------------------------------------------------------------------------------------------------------------------------------------------------------------------------------------|------------------|
| 1  | Data management                 | 19  | Plans for data entry, coding, security, and storage, including any related processes to promote data quality (eg, double data entry; range checks for data values). Reference to where details of data management procedures can be found, if not in the protocol                                                                     | ____ 17 ____     |
| 2  |                                 |     |                                                                                                                                                                                                                                                                                                                                       |                  |
| 3  |                                 |     |                                                                                                                                                                                                                                                                                                                                       |                  |
| 4  |                                 |     |                                                                                                                                                                                                                                                                                                                                       |                  |
| 5  | Statistical methods             | 20a | Statistical methods for analysing primary and secondary outcomes. Reference to where other details of the statistical analysis plan can be found, if not in the protocol                                                                                                                                                              | ____ 18-20 ____  |
| 6  |                                 |     |                                                                                                                                                                                                                                                                                                                                       |                  |
| 7  |                                 |     |                                                                                                                                                                                                                                                                                                                                       |                  |
| 8  |                                 | 20b | Methods for any additional analyses (eg, subgroup and adjusted analyses)                                                                                                                                                                                                                                                              | ____ 21 ____     |
| 9  |                                 |     |                                                                                                                                                                                                                                                                                                                                       |                  |
| 10 |                                 | 20c | Definition of analysis population relating to protocol non-adherence (eg, as randomised analysis), and any statistical methods to handle missing data (eg, multiple imputation)                                                                                                                                                       | ____ 18 ____     |
| 11 |                                 |     |                                                                                                                                                                                                                                                                                                                                       |                  |
| 12 |                                 |     |                                                                                                                                                                                                                                                                                                                                       |                  |
| 13 |                                 |     |                                                                                                                                                                                                                                                                                                                                       |                  |
| 14 | <b>Methods: Monitoring</b>      |     |                                                                                                                                                                                                                                                                                                                                       |                  |
| 15 |                                 |     |                                                                                                                                                                                                                                                                                                                                       |                  |
| 16 | Data monitoring                 | 21a | Composition of data monitoring committee (DMC); summary of its role and reporting structure; statement of whether it is independent from the sponsor and competing interests; and reference to where further details about its charter can be found, if not in the protocol. Alternatively, an explanation of why a DMC is not needed | ____ 17, 26 ____ |
| 17 |                                 |     |                                                                                                                                                                                                                                                                                                                                       |                  |
| 18 |                                 |     |                                                                                                                                                                                                                                                                                                                                       |                  |
| 19 |                                 |     |                                                                                                                                                                                                                                                                                                                                       |                  |
| 20 |                                 |     |                                                                                                                                                                                                                                                                                                                                       |                  |
| 21 |                                 |     |                                                                                                                                                                                                                                                                                                                                       |                  |
| 22 |                                 | 21b | Description of any interim analyses and stopping guidelines, including who will have access to these interim results and make the final decision to terminate the trial                                                                                                                                                               | ____ 18 ____     |
| 23 |                                 |     |                                                                                                                                                                                                                                                                                                                                       |                  |
| 24 |                                 |     |                                                                                                                                                                                                                                                                                                                                       |                  |
| 25 | Harms                           | 22  | Plans for collecting, assessing, reporting, and managing solicited and spontaneously reported adverse events and other unintended effects of trial interventions or trial conduct                                                                                                                                                     | ____ 16, 18 ____ |
| 26 |                                 |     |                                                                                                                                                                                                                                                                                                                                       |                  |
| 27 |                                 |     |                                                                                                                                                                                                                                                                                                                                       |                  |
| 28 | Auditing                        | 23  | Frequency and procedures for auditing trial conduct, if any, and whether the process will be independent from investigators and the sponsor                                                                                                                                                                                           | ____ 17 ____     |
| 29 |                                 |     |                                                                                                                                                                                                                                                                                                                                       |                  |
| 30 |                                 |     |                                                                                                                                                                                                                                                                                                                                       |                  |
| 31 |                                 |     |                                                                                                                                                                                                                                                                                                                                       |                  |
| 32 | <b>Ethics and dissemination</b> |     |                                                                                                                                                                                                                                                                                                                                       |                  |
| 33 |                                 |     |                                                                                                                                                                                                                                                                                                                                       |                  |
| 34 | Research ethics approval        | 24  | Plans for seeking research ethics committee/institutional review board (REC/IRB) approval                                                                                                                                                                                                                                             | ____ 26 ____     |
| 35 |                                 |     |                                                                                                                                                                                                                                                                                                                                       |                  |
| 36 |                                 |     |                                                                                                                                                                                                                                                                                                                                       |                  |
| 37 | Protocol amendments             | 25  | Plans for communicating important protocol modifications (eg, changes to eligibility criteria, outcomes, analyses) to relevant parties (eg, investigators, REC/IRBs, trial participants, trial registries, journals, regulators)                                                                                                      | ____ 17, 26 ____ |
| 38 |                                 |     |                                                                                                                                                                                                                                                                                                                                       |                  |
| 39 |                                 |     |                                                                                                                                                                                                                                                                                                                                       |                  |
| 40 |                                 |     |                                                                                                                                                                                                                                                                                                                                       |                  |
| 41 |                                 |     |                                                                                                                                                                                                                                                                                                                                       |                  |
| 42 |                                 |     |                                                                                                                                                                                                                                                                                                                                       |                  |
| 43 |                                 |     |                                                                                                                                                                                                                                                                                                                                       |                  |
| 44 |                                 |     |                                                                                                                                                                                                                                                                                                                                       |                  |
| 45 |                                 |     |                                                                                                                                                                                                                                                                                                                                       |                  |
| 46 |                                 |     |                                                                                                                                                                                                                                                                                                                                       |                  |

|    |                               |     |                                                                                                                                                                                                                                                                                     |                    |
|----|-------------------------------|-----|-------------------------------------------------------------------------------------------------------------------------------------------------------------------------------------------------------------------------------------------------------------------------------------|--------------------|
| 1  | Consent or assent             | 26a | Who will obtain informed consent or assent from potential trial participants or authorised surrogates, and how (see Item 32)                                                                                                                                                        | ___ 13 ___         |
| 2  |                               |     |                                                                                                                                                                                                                                                                                     |                    |
| 3  |                               |     |                                                                                                                                                                                                                                                                                     |                    |
| 4  |                               | 26b | Additional consent provisions for collection and use of participant data and biological specimens in ancillary studies, if applicable                                                                                                                                               | ___ N/A ___        |
| 5  |                               |     |                                                                                                                                                                                                                                                                                     |                    |
| 6  |                               |     |                                                                                                                                                                                                                                                                                     |                    |
| 7  | Confidentiality               | 27  | How personal information about potential and enrolled participants will be collected, shared, and maintained in order to protect confidentiality before, during, and after the trial                                                                                                | ___ 17 ___         |
| 8  |                               |     |                                                                                                                                                                                                                                                                                     |                    |
| 9  |                               |     |                                                                                                                                                                                                                                                                                     |                    |
| 10 | Declaration of interests      | 28  | Financial and other competing interests for principal investigators for the overall trial and each study site                                                                                                                                                                       | ___ 26 ___         |
| 11 |                               |     |                                                                                                                                                                                                                                                                                     |                    |
| 12 |                               |     |                                                                                                                                                                                                                                                                                     |                    |
| 13 | Access to data                | 29  | Statement of who will have access to the final trial dataset, and disclosure of contractual agreements that limit such access for investigators                                                                                                                                     | ___ 17, 26 ___     |
| 14 |                               |     |                                                                                                                                                                                                                                                                                     |                    |
| 15 |                               |     |                                                                                                                                                                                                                                                                                     |                    |
| 16 | Ancillary and post-trial care | 30  | Provisions, if any, for ancillary and post-trial care, and for compensation to those who suffer harm from trial participation                                                                                                                                                       | ___ N/A ___        |
| 17 |                               |     |                                                                                                                                                                                                                                                                                     |                    |
| 18 |                               |     |                                                                                                                                                                                                                                                                                     |                    |
| 19 |                               |     |                                                                                                                                                                                                                                                                                     |                    |
| 20 | Dissemination policy          | 31a | Plans for investigators and sponsor to communicate trial results to participants, healthcare professionals, the public, and other relevant groups (eg, via publication, reporting in results databases, or other data sharing arrangements), including any publication restrictions | ___ 17 ___         |
| 21 |                               |     |                                                                                                                                                                                                                                                                                     |                    |
| 22 |                               |     |                                                                                                                                                                                                                                                                                     |                    |
| 23 |                               |     |                                                                                                                                                                                                                                                                                     |                    |
| 24 |                               | 31b | Authorship eligibility guidelines and any intended use of professional writers                                                                                                                                                                                                      | ___ 27 ___         |
| 25 |                               |     |                                                                                                                                                                                                                                                                                     |                    |
| 26 |                               | 31c | Plans, if any, for granting public access to the full protocol, participant-level dataset, and statistical code                                                                                                                                                                     | ___ 26 ___         |
| 27 |                               |     |                                                                                                                                                                                                                                                                                     |                    |
| 28 |                               |     |                                                                                                                                                                                                                                                                                     |                    |
| 29 | <b>Appendices</b>             |     |                                                                                                                                                                                                                                                                                     |                    |
| 30 |                               |     |                                                                                                                                                                                                                                                                                     |                    |
| 31 | Informed consent materials    | 32  | Model consent form and other related documentation given to participants and authorised surrogates                                                                                                                                                                                  | ___ Appendix 2 ___ |
| 32 |                               |     |                                                                                                                                                                                                                                                                                     |                    |
| 33 |                               |     |                                                                                                                                                                                                                                                                                     |                    |
| 34 | Biological specimens          | 33  | Plans for collection, laboratory evaluation, and storage of biological specimens for genetic or molecular analysis in the current trial and for future use in ancillary studies, if applicable                                                                                      | ___ N/A ___        |
| 35 |                               |     |                                                                                                                                                                                                                                                                                     |                    |
| 36 |                               |     |                                                                                                                                                                                                                                                                                     |                    |

\*It is strongly recommended that this checklist be read in conjunction with the SPIRIT 2013 Explanation & Elaboration for important clarification on the items. Amendments to the protocol should be tracked and dated. The SPIRIT checklist is copyrighted by the SPIRIT Group under the Creative Commons "[Attribution-NonCommercial-NoDerivs 3.0 Unported](https://creativecommons.org/licenses/by-nc-nd/3.0/)" license.

# BMJ Open

## Efficacy, Safety and Response Predictors of Adjuvant Astragalus for Diabetic Kidney Disease (READY) – Study Protocol of an Add-on, Assessor-blind, Parallel, Pragmatic Randomised Controlled Trial

|                                 |                                                                                                                                                                                                                                                                                                                                                                                                                                                                                                                                                                                                                                                                                                                                                                                                                                                                                                                                                                                                                                                                                                                                                                                                                         |
|---------------------------------|-------------------------------------------------------------------------------------------------------------------------------------------------------------------------------------------------------------------------------------------------------------------------------------------------------------------------------------------------------------------------------------------------------------------------------------------------------------------------------------------------------------------------------------------------------------------------------------------------------------------------------------------------------------------------------------------------------------------------------------------------------------------------------------------------------------------------------------------------------------------------------------------------------------------------------------------------------------------------------------------------------------------------------------------------------------------------------------------------------------------------------------------------------------------------------------------------------------------------|
| Journal:                        | <i>BMJ Open</i>                                                                                                                                                                                                                                                                                                                                                                                                                                                                                                                                                                                                                                                                                                                                                                                                                                                                                                                                                                                                                                                                                                                                                                                                         |
| Manuscript ID                   | bmjopen-2020-042686.R1                                                                                                                                                                                                                                                                                                                                                                                                                                                                                                                                                                                                                                                                                                                                                                                                                                                                                                                                                                                                                                                                                                                                                                                                  |
| Article Type:                   | Protocol                                                                                                                                                                                                                                                                                                                                                                                                                                                                                                                                                                                                                                                                                                                                                                                                                                                                                                                                                                                                                                                                                                                                                                                                                |
| Date Submitted by the Author:   | 07-Dec-2020                                                                                                                                                                                                                                                                                                                                                                                                                                                                                                                                                                                                                                                                                                                                                                                                                                                                                                                                                                                                                                                                                                                                                                                                             |
| Complete List of Authors:       | <p>CHAN, Kam Wa; The University of Hong Kong, Department of Medicine<br/> KWONG, Alfred; Hospital Authority Hong Kong West Cluster, Department of Family Medicine and Primary Healthcare<br/> TSUI, Pun Nang ; Hospital Authority Hong Kong East Cluster, Department of Family Medicine and Primary Healthcare<br/> CHEUNG, Simon Chi Yuen ; Queen Elizabeth Hospital, Department of Medicine<br/> CHAN, Gary; Queen Mary Hospital, Division of Nephrology, Department of Medicine<br/> CHOI, Wing Fai ; University of Hong Kong, School of Chinese Medicine<br/> YIU, Wai Han ; The University of Hong Kong, Division of Nephrology, Department of Medicine<br/> ZHANG, Yanbo ; University of Hong Kong, School of Chinese Medicine<br/> Wong, Michelle Man-Ying; Hospital Authority Hong Kong East Cluster, Department of Family Medicine and Primary Healthcare<br/> Zhang, Zhang-Jin; University of Hong Kong, School of Chinese Medicine<br/> TAN, Kathryn; The University of Hong Kong, Department of Medicine<br/> Lao, Lixing; University of Hong Kong, School of Chinese Medicine;<br/> Virginia University of Integrative Medicine<br/> TANG, Sydney; The University of Hong Kong, Department of Medicine</p> |
| <b>Primary Subject Heading</b>: | Complementary medicine                                                                                                                                                                                                                                                                                                                                                                                                                                                                                                                                                                                                                                                                                                                                                                                                                                                                                                                                                                                                                                                                                                                                                                                                  |
| Secondary Subject Heading:      | Diabetes and endocrinology, Evidence based practice, Patient-centred medicine, Renal medicine                                                                                                                                                                                                                                                                                                                                                                                                                                                                                                                                                                                                                                                                                                                                                                                                                                                                                                                                                                                                                                                                                                                           |
| Keywords:                       | Diabetic nephropathy & vascular disease < DIABETES & ENDOCRINOLOGY, Clinical trials < THERAPEUTICS, COMPLEMENTARY MEDICINE, DIABETES & ENDOCRINOLOGY, Nephrology < INTERNAL MEDICINE                                                                                                                                                                                                                                                                                                                                                                                                                                                                                                                                                                                                                                                                                                                                                                                                                                                                                                                                                                                                                                    |
|                                 |                                                                                                                                                                                                                                                                                                                                                                                                                                                                                                                                                                                                                                                                                                                                                                                                                                                                                                                                                                                                                                                                                                                                                                                                                         |

SCHOLARONE™  
Manuscripts

1  
2  
3  
4  
5  
6  
7  
8  
9  
10  
11  
12  
13  
14  
15  
16  
17  
18  
19  
20  
21  
22  
23  
24  
25  
26  
27  
28  
29  
30  
31  
32  
33  
34  
35  
36  
37  
38  
39  
40  
41  
42  
43  
44  
45  
46  
47  
48  
49  
50  
51  
52  
53  
54  
55  
56  
57  
58  
59  
60





I, the Submitting Author has the right to grant and does grant on behalf of all authors of the Work (as defined in the below author licence), an exclusive licence and/or a non-exclusive licence for contributions from authors who are: i) UK Crown employees; ii) where BMJ has agreed a CC-BY licence shall apply, and/or iii) in accordance with the terms applicable for US Federal Government officers or employees acting as part of their official duties; on a worldwide, perpetual, irrevocable, royalty-free basis to BMJ Publishing Group Ltd ("BMJ") its licensees and where the relevant Journal is co-owned by BMJ to the co-owners of the Journal, to publish the Work in this journal and any other BMJ products and to exploit all rights, as set out in our [licence](#).

The Submitting Author accepts and understands that any supply made under these terms is made by BMJ to the Submitting Author unless you are acting as an employee on behalf of your employer or a postgraduate student of an affiliated institution which is paying any applicable article publishing charge ("APC") for Open Access articles. Where the Submitting Author wishes to make the Work available on an Open Access basis (and intends to pay the relevant APC), the terms of reuse of such Open Access shall be governed by a Creative Commons licence – details of these licences and which [Creative Commons](#) licence will apply to this Work are set out in our licence referred to above.

Other than as permitted in any relevant BMJ Author's Self Archiving Policies, I confirm this Work has not been accepted for publication elsewhere, is not being considered for publication elsewhere and does not duplicate material already published. I confirm all authors consent to publication of this Work and authorise the granting of this licence.

1  
2  
3  
4 **Efficacy, Safety and Response Predictors of Adjuvant Astragalus for Diabetic Kidney**

5  
6  
7 **Disease (READY) – Study Protocol of an Add-on, Assessor-blind, Parallel, Pragmatic**

8  
9  
10 **Randomised Controlled Trial**

11  
12  
13  
14 Kam Wa CHAN BCM MSPH MD PHD<sup>1</sup>, Alfred Siu Kei KWONG MBBS<sup>2</sup>, Pun Nang TSUI

15  
16  
17 MBBS<sup>3</sup>, Simon Chi Yuen CHEUNG MBBS MD PHD<sup>4</sup>, Gary Chi Wang CHAN MBBS PHD<sup>5</sup>,

18  
19  
20 Wing Fai CHOI BCM<sup>6</sup>, Wai Han YIU PHD<sup>1</sup>, Yanbo ZHANG PHD<sup>6</sup>, Michelle Man Ying

21  
22  
23 WONG MBBS<sup>3</sup>, Zhang-Jin ZHANG MB MD<sup>6</sup>, Kathryn Choon Beng TAN MBBCH MD<sup>7</sup>, Lixing

24  
25  
26 LAO MB PHD<sup>6,8</sup>, Sydney Chi Wai TANG MBBS MD PHD<sup>1\*</sup>

27  
28  
29 <sup>1</sup> Division of Nephrology, Department of Medicine, The University of Hong Kong, Hong Kong SAR, China

30  
31  
32 <sup>2</sup> Department of Family Medicine and Primary Healthcare, Hospital Authority Hong Kong West Cluster, Hong  
33  
34  
35 Kong SAR, China

36  
37  
38 <sup>3</sup> Department of Family Medicine and Primary Healthcare, Hospital Authority Hong Kong East Cluster, Hong  
39  
40  
41 Kong SAR, China

42  
43  
44 <sup>4</sup> Division of Nephrology, Department of Medicine, Queen Elizabeth Hospital, Hong Kong SAR, China

45  
46  
47 <sup>5</sup> Division of Nephrology, Department of Medicine, Queen Mary Hospital, Hong Kong SAR, China

48  
49  
50 <sup>6</sup> School of Chinese Medicine, The University of Hong Kong, Hong Kong SAR, China

51  
52  
53 <sup>7</sup> Division of Endocrinology, Department of Medicine, The University of Hong Kong, Hong Kong SAR, China

54  
55  
56 <sup>8</sup> Virginia University of Integrative Medicine, Virginia, USA

1  
2  
3  
4 **Running Title**  
5

6  
7 Randomised controlled trial of astragalus for diabetic kidney disease  
8  
9

10 **Corresponding Author**  
11  
12

13 \*Sydney Chi Wai TANG,  
14

15  
16 Department of Medicine, 4/F Professorial Block, 102 Pokfulam Road, Hong Kong  
17

18  
19 (Email: [scwtang@hku.hk](mailto:scwtang@hku.hk), Tel: +852 2255 4777)  
20  
21

22 **Word Count**  
23  
24

25 3515 words, 1 figure, 1 table, 55 references, 2 appendixes, 1 supplementary file  
26  
27  
28  
29  
30  
31  
32  
33  
34  
35  
36  
37  
38  
39  
40  
41  
42  
43  
44  
45  
46  
47  
48  
49  
50  
51  
52  
53  
54  
55  
56  
57  
58  
59  
60

## Abstract

### Introduction

Diabetic kidney disease (DKD) is a prevalent and costly complication of diabetes with limited therapeutic options, leading the cause of end-stage renal disease in most developed regions. Recent big data studies showed that add-on Chinese medicine (CM) led to reduced risk of end-stage renal disease and mortality among chronic kidney disease patients with diabetes. Astragalus, commonly known as huang-qi, is the most prescribed CM or used dietary herb in China for diabetes and DKD. *In vivo* and *in vitro* studies showed that astragalus could ameliorate podocyte apoptosis, foot process effacement, mesangial expansion, glomerulosclerosis and interstitial fibrosis. Nevertheless, the clinical effect of astragalus remained uncharacterised. This pragmatic clinical trial aims to evaluate the effectiveness of add-on astragalus on type 2 diabetic patients with stage 2 to 3 chronic kidney disease and macroalbuminuria and identify related response predictors.

### Methods and analysis

This is an add-on, assessor-blind, parallel, pragmatic randomised controlled clinical trial. 118 patients diagnosed with DKD will be recruited and randomised 1:1 to a 48-week add-on astragalus or standard medical care. Primary endpoints are the changes in estimated glomerular filtration rate and urine albumin-to-creatinine ratio between baseline and

1  
2  
3  
4 treatment endpoint. Secondary endpoints include adverse events, fasting blood glucose,  
5  
6  
7 glycated haemoglobin, lipids and other biomarkers. Adverse events are monitored through  
8  
9  
10 self-complete questionnaire and clinical visits. Outcomes will be analysed by regression  
11  
12  
13 models. Subgroup and sensitivity analyses will be conducted for different epidemiological  
14  
15  
16 subgroups and statistical analyses. Enrollment started in July 2018.

### 17 18 19 **Ethics and dissemination**

20  
21  
22 This study was approved by the Institutional Review Board of the University of Hong Kong /  
23  
24  
25 Hospital Authority Hong Kong West/East/Kowloon Central clusters (UW 16-553/HKEC-  
26  
27  
28 2019-026/REC (KC/KE)-19-0049/ER-4). We will report the findings in medical journals and  
29  
30  
31 conferences. The dataset will be available upon reasonable request.

### 32 33 34 **Trial registration**

35  
36  
37 This study is prospectively registered on ClinicalTrials.gov (NCT03535935) on 24 May  
38  
39  
40 2018.

## STENGTHS AND LIMITATIONS

### Strengths

1. Existing epidemiological data suggested that Chinese medicine was associated with retarded progression of renal function among diabetic kidney disease patients and it is timely to perform a clinical trial on astragalus, the most used herbs in diabetes and diabetic kidney disease with unclear clinical effectiveness.
2. The inclusion / exclusion criteria, primary outcome measurement and the corresponding analyses are designed according to conventionally used parameters to facilitate further meta-analysis with other clinical studies for wide range of audience.
3. A responder analysis is built into the trial as secondary analysis to identify possible factors (including biomarkers and symptom-based diagnosis) that could lead to more personalised the use of astragalus.
4. We conducted a focus group interview series to explore the expectations of patients and clinicians (both conventional and Chinese medicine) to refine the study design (drug form, dosage, administration route, frequency, health services delivery and outcome measurement) for better clinical translation.

### Limitations

1. As the trial is open-label, subjective outcomes including quality of life could not be assessed.

## Keywords

Diabetic kidney disease; clinical trial; astragalus, huangqi; effectiveness; renal medicine

For peer review only

## Introduction

In 2019, it was estimated that 463 million (9.3%) people was living with diabetes worldwide and the figure was projected to reach 578 million by 2030, with the highest prevalence in North America at present. (1) In 2017, The healthcare expenditure on diabetes reached US\$ 850 billion globally (11.6% of global health expenditure). (2, 3) Diabetic kidney disease (DKD) refers to the chronic kidney disease (CKD) caused by long-standing diabetes. DKD presents in more than one third of all diabetic patients and is the leading cause of end-stage renal disease in many developed regions which requires replacement therapy including dialysis and transplantation. (4, 5) In Hong Kong, the incidence of diabetes-related end-stage renal disease increased from 26.2% in 1996 to 49.6% in 2013 (6) and end-stage renal disease increased 5.23 times the annual direct medical cost to the local public health system. (7) Furthermore, DKD was accounted for 23.4% (31.1% vs 7.7%) absolute increase in 10-year mortality in US (8) and 16 years shorter life-expectancy in Taiwan (9) when compared to those without diabetes and kidney diseases.

The risk factors and pathogenesis of DKD are heterogeneous (5) involving metabolic, (10, 11) inflammatory, (12-14) hemodynamic, (15-18) and many other pathways. (5, 19) Thickening of glomerular basement membrane, mesangial expansion, effacement of foot process, formation of Kimmelstiel-Wilson nodules, glomerulosclerosis and interstitial fibrosis are classical histopathological features of DKD. (15, 20) Conventional blockade on the renin-



1  
2  
3  
4 angiotensin–aldosterone system (RAAS) offers limited effect on clinical outcomes. (21-24) In  
5  
6  
7 a previous meta-analysis of 9797 patients with stage 3 to 5 CKD, RAAS blockade did not  
8  
9  
10 reduce all-cause mortality and only provided a mild risk reduction in the composite endpoint  
11  
12  
13 of replacement therapy initiation or doubling of serum creatinine when compared to placebo  
14  
15  
16 or other antihypertensive agents. (22) RAAS blockade with combined angiotensin-converting  
17  
18  
19 enzyme inhibitor (ACEI) and angiotensin II receptor blocker (ARB) resulted in increased  
20  
21  
22 adverse events but not the expected synergistic effect. (23, 25) More therapies with different  
23  
24  
25 working mechanisms are needed.  
26

27  
28 Chinese Medicine (CM) has been extensively used among diabetes and DKD patients in  
29  
30  
31 Asia. (26, 27) Previous observational studies from Taiwan with 47,876 and 24,971 subjects  
32  
33  
34 showed that the use of add-on prescribed CM is associated with 40% reduction of mortality  
35  
36  
37 (27) and 59% risk reduction of end-stage renal disease, respectively. (26) *Astragalus*  
38  
39  
40 *membranaceus*, commonly known as huang-qi, is the most frequently used CM or dietary herb  
41  
42  
43 for DKD. (28) Systematic reviews showed that astragalus could enhance creatinine clearance,  
44  
45  
46 reduce albuminuria and reduce blood pressure among CKD and DKD patients. (29-31) Meta-  
47  
48  
49 analysis also showed that astragalus' effect in improving renal clearance and reducing  
50  
51  
52 albuminuria was better than routine care (without ACEI or ARB) and the efficacy was  
53  
54  
55 comparable to ACEI or ARB. (31) *In vivo* and *in vitro* evidence suggested that astragaloside  
56  
57  
58 IV, an active ingredient of astragalus, could ameliorate podocyte apoptosis, foot process  
59  
60

1  
2  
3  
4 effacement, mesangial expansion, glomerulosclerosis and interstitial fibrosis through  
5  
6  
7 regulating the NF- $\kappa$ B and TGF- $\beta_1$  signalling pathway, which partly explained the  
8  
9  
10 renoprotective effect. (32, 33) Nevertheless, the methodological reporting and quality of the  
11  
12  
13 existing clinical trials were inadequate and further evaluation is needed. Based on our  
14  
15  
16 preliminary result of ongoing trials, CM formulations containing astragalus is likely to retard  
17  
18  
19 the progression of DKD. (34, 35) Considering the extensive currently use of astragalus, clinical  
20  
21  
22 study could be considered before preclinical investigation as suggested by the World Health  
23  
24  
25 Organisation. (36)  
26  
27  
28  
29  
30  
31  
32  
33  
34  
35  
36  
37  
38  
39  
40  
41  
42  
43  
44  
45  
46  
47  
48  
49  
50  
51  
52  
53  
54  
55  
56  
57  
58  
59  
60

## Methods/Design

### Objective

This pragmatic clinical trial aims to evaluate the effectiveness of add-on astragalus on type 2 diabetic patients with stage 2 to 3 chronic kidney disease and macroalbuminuria, and to identify related response predictors for subsequent large-scale health services research.

### Study Design

Add-on, assessor-blind, parallel, pragmatic randomised controlled trial. The World Health Organisation Trial Registration Data Set (Appendix 1) and SPIRIT checklist (Supplementary File) are enclosed.

### *Inclusion and exclusion criteria*

Patients with 1) type 2 diabetes for at least 5 years; 2) estimated glomerular filtration rate (GFR)  $\geq 30$  and  $< 90$  mL/min/1.73m<sup>2</sup> confirmed by repeated testing over three months calculated by the abbreviated MDRD study equation; (37, 38) 3) persistent macroalbuminuria with spot urine albumin-to-creatinine ratio (UACR)  $\geq 300$  mg/g confirmed by at least 2 consecutive first morning void urine samples; 4) age between 35 to 80 years old; 5) stable dose of anti-diabetic agent(s) including insulin for at least 12 weeks; and 6) stable dose of ACEI or ARB for at least 12 weeks will be recruited.

Patients will be excluded if with 1) UACR  $\geq 5000$  mg/g; 2) a known history of glomerulonephritis, polycystic kidney disease, systemic lupus erythematosus or any

1  
2  
3  
4 suggestive evidence of nondiabetic glomerulopathy; 3) known history of kidney transplant; 4)  
5  
6  
7 concurrent severe disorders of heart, brain, liver, and hematopoietic system, tumor, mental  
8  
9  
10 disorder; 5) deranged liver function; 6) poorly controlled blood pressure; 7) known history of  
11  
12 intolerance or malabsorption of oral medications; 8) uncontrollable urinary infection; 9)  
13  
14  
15 experiencing pregnancy; and 10) participating in other clinical trial(s) within 30 days.  
16  
17

### 18 **Sample size calculation**

19  
20 Since the primary objective of this trial is to evaluate key clinical outcomes and to perform a  
21  
22 preliminary analysis on potential response predictors, we calculated the sample size based on  
23  
24 the control of inflation factor (IF) to the estimation of sample size for the subsequent large-  
25  
26 scale studies (39, 40). 118 patients (around 60 per group) are needed.  
27  
28  
29  
30  
31  
32  
33  
34  
35  
36

$$37 \quad IF = S_{ucl} / S_{obs} = \text{sqrt} [(n-1) / \chi^2_{1-\alpha, n-1}]$$

$$38 \quad N_{adj} / N_{unadj} \approx IF^2 \approx n_{unadj} * IF^2$$

$$39 \quad N \approx [2(\square_{1-\alpha/2} + \square_{1-\beta})^2 (IF*s)^2] / (\mu_1 - \mu_2)^2 = [2(\square_{1-\alpha/2} + \square_{1-\beta})^2 s^2] / (\mu_1 - \mu_2)^2$$

$$40 \quad \square_{1-\beta} = \square_{1-\alpha/2} (IF^{-1} - 1) + \square_{1-\beta} * IF^{-1}$$

41  
42  
43  
44  
45  
46  
47  
48  
49  
50  
51  
52 where IF = Inflation factor

53  
54  
55  $S_{ucl}$  = Standard deviation of upper confidence interval

56  
57  
58  $S_{obs}$  = Observed standard deviation in pilot study  
59  
60

1  
2  
3  
4  $\alpha$  = Chosen confidence level  
5

6  
7  $\beta$  = Nominal power set for main study  
8

9  
10  $\beta'$  = Actual power achieved for main study by using pilot standard deviation  
11

12  
13 for sample size calculation  
14

15  
16  $n$  = Sample size of pilot study  
17

18  
19  $N$  = Sample size of main study  
20

21  
22  $N_{\text{unadj}}$  = Sample size of main study with no adjustment on standard deviation  
23

24  
25  $N_{\text{adj}}$  = Sample size of main study with adjustment on standard deviation  
26  
27  
28  
29  
30

31 The standard deviation used for sample size calculation for large-scale main studies is  
32 often underestimated by small-scale pilot studies, therefore an IF is needed for adjustment in  
33 sample size calculation. (39, 40) IF is calculated based on the size of pilot study and the  
34 confidence level of achieving at least the desired power in subsequent main studies.  
35  
36  
37  
38  
39  
40  
41

42 Therefore, the actual achieved power of the main studies depends on the nominal power set  
43 for the main study and the IF.  
44  
45  
46  
47  
48

49 In order to be 95% confident (two-sided) that the main study achieves a power of 70%  
50 with nominal power set at 80% (i.e., a 10% power forfeit), the IF should be controlled to less  
51 than 1.13. At IF = 1.13, a sample size of 100 is therefore needed to attain 95% one-sided  
52 confidence that the main studies will achieve the nominal power to test the hypothesis of add-  
53  
54  
55  
56  
57  
58  
59  
60

1  
2  
3  
4 on astragalus could be more effective in stabilising the GFR among DKD patients when  
5  
6  
7 compared to standard care. To allow a 15% attrition rate, a sample size of 118 patients is  
8  
9  
10 therefore needed for this pilot study.  
11

12  
13 Currently, there is limited evidence on the symptom-based response predictors of  
14  
15  
16 astragalus. A general recommendation for power estimation is to have 10 events per variable  
17  
18  
19 (41). From the previous systematic review, we estimate that around 60% of patients will have  
20  
21  
22 stabilised GFR after receiving astragalus. (31) 118 subjects with 15% attrition will power up  
23  
24  
25 to 6 variables for the screening of predictors. A univariable screening on the 11 pre-specified  
26  
27  
28 potential symptom-based predictors will be conducted to reduce the number of predictors for  
29  
30  
31 the subsequent multivariable regression analysis, in order to maximise the power of the  
32  
33  
34 regression analysis.  
35

### 36 37 ***Recruitment and randomisation*** 38

39  
40 Patients will be recruited from general and specialist outpatient clinics of Queen Mary  
41  
42  
43 Hospital, Queen Elizabeth Hospital, Hospital Authority Hong Kong East Cluster through  
44  
45  
46 consultations, and the community via public health campaigns. The details of study will be  
47  
48  
49 explained by principal investigators (PIs) or co-investigators (Co-Is) before written consent is  
50  
51  
52 obtained from each participating patient. All patients will undergo a 2-week run-in period,  
53  
54  
55 during which the dosage of their medications will be stabilised. Blood and urine sample will  
56  
57  
58 be sent to an independent local laboratory for screening. Patients are considered eligible for  
59  
60

1  
2  
3  
4 the study if their liver functions are normal and fulfil the inclusion criteria. Recruitment  
5  
6  
7 started in July 2018 and the recruitment is on-going.  
8  
9

10 A random sequence was generated and encrypted with computer by an independent staff  
11  
12 of the University of Hong Kong and kept in sealed opaque envelopes. The password of the  
13  
14 sequence is kept in a sealed, duly signed opaque envelop locked by research assistants (RAs).  
15  
16 The allocation sequence is concealed from PIs, Co-Is, CM physicians and all research staffs  
17  
18 that are responsible for patient screening, randomisation or sample analysis. Eligible patients  
19  
20 will be randomised 1:1 to either receive active intervention along with standard care or  
21  
22 standard care alone. The allocation is masked from the outcome assessor (technicians from an  
23  
24 independent laboratory). The study subjects could not be masked due to the nature of  
25  
26 treatment. Since the primary clinical outcomes under investigation are objectively assessed  
27  
28 and the outcome assessor is blinded, placebo effect and outcome measurement bias should be  
29  
30 minimised. The flow of study is presented in **Figure 1**. Under no circumstances the primary  
31  
32 outcome assessors will be unblinded.  
33  
34  
35  
36  
37  
38  
39  
40  
41  
42  
43  
44  
45

#### 46 ***Intervention and control***

47  
48

49 The intervention under investigation is astragalus. Patients under intervention will receive  
50  
51 astragalus daily on top of standard medical care for 48 weeks. The CM physicians will advise  
52  
53 on the dose and possible adverse events of astragalus based on his/her professional  
54  
55 knowledge. Existing literature supports a safe dosage of raw astragalus from 15 to 50 g/day.  
56  
57  
58  
59  
60

1  
2  
3  
4 (42, 43) According to the China Pharmacopeia, the recommended therapeutic dosage of  
5  
6  
7 astragalus is below 30 g/day. To ensure the safety of patients, CM physicians are reminded  
8  
9  
10 not to propose dosage exceeding 30 g/day. All patients will continue their standard  
11  
12  
13 medication and follow-up with the same consultation schedule with CM physicians. Standard  
14  
15  
16 care is used as control to best reflect the real-world practice and the future application  
17  
18  
19 scenario of this trial. (44)

### 21 22 ***Herbal safety***

23  
24 Soluble herbal granules prepared by PuraPharm (listed in US Pharmacopeia as dietary  
25  
26  
27 ingredient: VER-DI-PUR-09) are used. The production process is in strict compliance with  
28  
29  
30 standards of Good Manufacturing Practice (GMP). Fully registered CM physicians from the  
31  
32  
33 School of Chinese Medicine, The University of Hong Kong will be responsible for the  
34  
35  
36 clinical diagnosis and prescription. After 4 to 6 weeks of randomisation, all patients will  
37  
38  
39 undergo liver function tests and renal function tests to monitor acute changes of renal and  
40  
41  
42  
43 liver function.

### 44 45 46 ***Outcome measurement***

47  
48  
49 The primary outcome measures are the changes of estimated GFR (45) and UACR from  
50  
51  
52 baseline (week 0) to treatment endpoint (week 48). As the progression of kidney disease is  
53  
54  
55 slow, we believe reporting 1-year (48-week) change in GFR is necessary to avoid  
56  
57  
58 extrapolation while extended observation may lead to substantial attrition and is limited by  
59  
60



1  
2  
3  
4 resources. Secondary outcome measures include adverse events, and changes in CKD stage,  
5  
6  
7 haemoglobin A<sub>1c</sub> (HbA<sub>1c</sub>), lipids, urinary monocyte chemotactic protein 1 (MCP-1) and  
8  
9  
10 urinary cystatin C from baseline to the midpoint (week 24) and the end of treatment.  
11  
12

### 13 ***Data collection***

14  
15  
16 Patient demographics including age, gender, body mass index (BMI), duration of diabetes,  
17  
18  
19 other medical history and concurrent medications will be retrieved by the electronic clinical  
20  
21  
22 management system of Hospital Authority by Co-Is and RAs. Estimated GFR, UACR,  
23  
24  
25 HbA<sub>1c</sub>, lipids and liver function tests will be assessed by an independent laboratory (Chan &  
26  
27  
28 Hou Medical Laboratories Limited) which is accredited by College of American Pathologists,  
29  
30  
31 Royal College of Pathologists Australasia and Quality Control for Molecular Diagnostics  
32  
33  
34 UK. MCP-1 and cystatin C will be assessed at lead-PI's research laboratory by an  
35  
36  
37 independent RA with commercially available kits. Blood pressure will be taken during  
38  
39  
40 consultation. Blood and urine samples will be taken at an overnight (>8 hours) fasting state.  
41  
42

43 Estimated GFR will be calculated using the MDRD equation with serum creatinine, age,  
44  
45  
46 ethnicity and gender. Clinical presentations and CM symptom-based diagnosis will be  
47  
48  
49 assessed in a structured consultation developed for this purpose. To ensure consistency and  
50  
51  
52 reliability of assessment and to minimise bias from investigators across the study, only 3  
53  
54  
55 synchronised CM physicians will assess the patients.  
56  
57

58 A self-complete questionnaire will be distributed to the subjects to monitor adverse  
59  
60

1  
2  
3  
4 events, and they are advised to inform the PIs, Co-Is, CM physicians or RAs immediately if  
5  
6  
7 adverse events arise. All adverse events will be coded based on Common Terminology  
8  
9  
10 Criteria for Adverse Events (CTCAE) 5.0, following the recommendation of CONSORT  
11  
12  
13 (Consolidated Standards of Reporting Trials) Extension for Chinese Herbal Medicine  
14  
15  
16 Formulas. (46)

17  
18  
19 Follow-up consultations will be held for all patients bi-weekly in the first month and  
20  
21  
22 monthly subsequently until the end of treatment for all patients. Minor adjustments are  
23  
24  
25 allowed based on clinical needs. Evaluation of outcomes will be performed at baseline, week  
26  
27  
28 24 (treatment midpoint) and 48 (end of treatment). The follow up schedule is summarised  
29  
30  
31 below in **Table 1**.

### 32 33 34 ***Data management***

35  
36  
37 A trial management committee (TMC) formed by lead-PI, Co-Is and RAs will centralise all  
38  
39  
40 trial data. Co-Is and RAs will collect, clean and send the data to TMC weekly. All data will be  
41  
42  
43 double entered, secured and cleaned before analysis to prevent data entry errors. TMC will  
44  
45  
46 have regular meetings monthly to discuss the progress and double check the data of the trial.  
47  
48  
49 Only PI, Co-Is and regulatory bodies will have access to the patient data to protect data privacy.

50  
51  
52 An independent Data and Safety Monitoring Board (DSMB) (VCH Chung, W Wong, JWF  
53  
54  
55 Yeung) has been established with expert in methodology, biostatistics and clinical medicine to  
56  
57  
58 monitor the progress of the trial, including adverse events and change in protocol. DSMB will  
59  
60

1  
2  
3  
4 have meetings twice a year. No competing interests has been reported from DSMB. Trial result  
5  
6  
7 will be published in academic journal and trial subjects will be notified.  
8  
9

### 10 ***Handling of withdraw and dropout***

11  
12  
13  
14 In order to maximise subjects' compliance, we will provide a triple thorough consent process  
15  
16  
17 for all participants covering details of the study schedule, potential side effects of treatment,  
18  
19  
20 and the responsibilities of the subjects. An independent e-mail account and a direct telephone  
21  
22  
23 line is available for this study to enable active communication with patients. Extra visits will  
24  
25  
26 be arranged for patients if necessary. To monitor the adherence of study medication, we will  
27  
28  
29 arrange irregular visits for patients and count the unfinished medication.  
30

### 31 ***Termination criteria***

32  
33  
34  
35 The treatment will be terminated for a specific subject if he/she: 1) develops serious adverse  
36  
37  
38 event (SAE); 2) develops hypersensitivity towards astragalus; and 3) participates in other  
39  
40  
41 clinical trial. The whole study will be terminated under the following circumstances: 1)  
42  
43  
44 presence of clustered SAE(s) related to astragalus with supportive evidence; and 2)  
45  
46  
47 completion of all follow-up assessments.  
48  
49

50  
51  
52  
53 SAE includes adverse events that result in death, require either hospitalisation or the  
54  
55  
56 prolongation of hospitalisation, are life-threatening, result in a persistent or significant  
57  
58  
59 disability/incapacity, result in a congenital anomaly/birth defect or events classified as Grade  
60  
3 or above in CTCAE 5.0. Other important medical events, based upon appropriate medical

1  
2  
3  
4 judgement, may also be considered SAEs if a patient's health is at risk and intervention is  
5  
6  
7 required to prevent an outcome mentioned.  
8  
9

### 10 ***Data analysis***

11  
12  
13 Missing values will be imputed by multiple regression. The analysis will follow intention-to-  
14  
15  
16 treat principle that all randomised patients will be included in the analysis. STATA and  
17  
18  
19 PRISM will be used for the analysis.  
20  
21

22 Demographics will be presented as mean  $\pm$  standard deviation or percentage. UACR will  
23  
24  
25 be log-transformed and reported as geometric means. Smoking history will be stratified into  
26  
27  
28 non-smoker, ex-smoker and current smoker. Rapid renal progression is pre-defined as a  
29  
30  
31 consecutive annual GFR drop of over 5 ml/min/1.73m<sup>2</sup> or a cumulative GFR drop of over 25  
32  
33  
34 ml/min/1.73m<sup>2</sup> for 5 years. (47, 48) Differences in mean and proportion between groups will  
35  
36  
37 be tested by t-test and  $\chi^2$  test.  
38  
39

40 Mixed regression models will be used to compare the rate of change in estimated GFR  
41  
42  
43 and UACR. Analysis of covariance (ANCOVA) will be used to compare the adjusted mean  
44  
45  
46 of outcomes at week 48 between intervention group and control group with the corresponding  
47  
48  
49 baseline values as covariates. Data will be presented as the difference in adjusted means  
50  
51  
52 between the groups with 95% CI and the corresponding p-value.  
53  
54

55 The adverse events will be recorded according to CTCAE 5.0 and categorised into 5  
56  
57  
58 grades (Grade 1: mild, asymptomatic or mild symptoms, clinical or diagnostic observations  
59  
60

1  
2  
3  
4 only, no intervention indicated; Grade 2: moderate, minimal, local or non-invasive  
5  
6  
7 intervention indicated, limiting age-appropriate instrumental activities of daily living; Grade  
8  
9  
10 3: severe or medically significant but not immediately life-threatening, hospitalisation or  
11  
12 prolongation of hospitalisation indicated, disabling, limiting self-care activities of daily  
13  
14 living; Grade 4: life-threatening consequences, urgent intervention indicated; and Grade 5:  
15  
16 death related to adverse events). The percentage of all adverse events with more than 1 case  
17  
18 will be compared between groups. SAE will be analysed case by case descriptively.  
19  
20  
21  
22  
23  
24

25 To minimise Type I error inflation, the analysis will follow a hierarchical approach in  
26  
27 the order of 1) comparison of baseline to end of treatment on estimated GFR and UACR; 2)  
28  
29 comparison of baseline to end of treatment on other outcome measurements; 3) comparison  
30  
31 of baseline to treatment midpoints on estimated GFR and UACR and 4) comparison of  
32  
33 baseline to treatment midpoints on other outcome measurements.  
34  
35  
36  
37  
38  
39

40 For the assessment of predictive factors as secondary analysis, the dependent variable  
41  
42 will be the treatment response which is categorised into:  
43  
44  
45

- 46 1. Improved or stabilised renal function, defined as estimated GFR after 48-week  
47  
48 treatment being higher or equal to baseline.  
49  
50
- 51 2. Non-responder, defined as patients having estimated GFR decreased at a rate of less  
52  
53 than 5 mL/min/1.73m<sup>2</sup> after 48-week treatment compared to baseline.  
54  
55  
56  
57  
58  
59  
60

3. Rapid deteriorating renal function, defined as estimated GFR of more than 8 mL/min/1.73m<sup>2</sup> after 48-week treatment compared to baseline.

Potential prognostic variables (baseline values) will include:

1. Demographics: age, gender, BMI, systolic blood pressure, history and duration of smoking and alcohol consumption
2. Symptom-based diagnosis: presence of CM-based symptom-based subtype (e.g. *spleen and kidney qi deficiency*) based on the presentation of standardised and commonly documented signs and symptoms (49)
3. Biochemical profile: GFR, UACR, HbA<sub>1c</sub>, lipids

All potential predictors will first be included into univariable regression models followed by multivariable stepwise regression analysis. Variables that are not significant at a 5% level will be excluded.

Subgroup analyses will be performed for 1) CKD stages stratified into stage 2, 3a and 3b; (50) 2) UACR levels stratified by 100 mg/mmol; (51) 3) gender and 4) age groups. Sensitivity analyses will be performed for 1) per-protocol cohort; 2) estimation of GFR by c-MDRD (52) and CKD-EPI (53) equations; 3) missing data imputed with last-observation-carried-forward and 4) different analytical approaches (change-score) and categorisations of primary outcomes.

## Patient and public involvement

1  
2  
3  
4 We conducted a focus group interview series to collate the experience and expectations of  
5  
6  
7 patients and clinicians (both conventional and Chinese medicine) on the study design (drug  
8  
9  
10 form, dosage, administration route, frequency, health services delivery and outcome  
11  
12  
13 measurement) for this trial. (54) The study results will be disseminated to diabetes patient  
14  
15  
16 groups and the participants via public workshops and talks.

### 17 18 19 **Ethics and dissemination**

20  
21  
22 This study was approved and monitored by the Institutional Review Board of the University  
23  
24  
25 of Hong Kong / Hospital Authority Hong Kong West/East/Kowloon Central clusters (Ref:  
26  
27  
28 UW 16-553/HKEC-2019-026/REC (KC/KE)-19-0049/ER-4). The patient information sheet  
29  
30  
31 and consent form are enclosed in Appendix 2. Result will be disseminated as conference  
32  
33  
34 presentations and journal publications upon completion.  
35  
36  
37  
38  
39  
40  
41  
42  
43  
44  
45  
46  
47  
48  
49  
50  
51  
52  
53  
54  
55  
56  
57  
58  
59  
60

## Discussion

Diabetes and DKD are significant public health burdens and astragalus is the most used herbs among these patients with unclear clinical effectiveness. There is an urgent need to characterise the effect and response predictors of astragalus to prevent unnecessary consumption and to increase the cost-effectiveness of administration. Also, the assessment of response predictors of both biomarkers and symptom-based factors will facilitate the integration and clinical translation of generated evidence between conventional medicine and CM physicians. Based on our preliminary result of ongoing trials, CM formulations containing astragalus is likely to retard the progression of DKD. (34, 35) This trial aims to evaluate the effect of astragalus and identify related response predictors for more personalised application and further large-scale health services research.

To facilitate further meta-analysis with other clinical studies for wide range of audience, the inclusion / exclusion criteria, primary outcome measurement and the corresponding analyses are designed according to conventionally used parameters similar to other pharmaceutical studies. (55) A responder analysis is included as secondary analysis to identify possible factors (including biomarkers and symptom-based diagnosis) that could lead to more personalised the use of astragalus. Besides, we conducted a focus group interview series to explore the expectations of patients and clinicians (both conventional and Chinese medicine) to refine the study design for better clinical



1  
2  
3  
4 translation. (54) The major limitation of this trial is the open-label nature. The study subjects  
5  
6  
7 could not be masked due to the nature of treatment. Since the clinical outcomes under  
8  
9  
10 investigation are objective and the outcome assessor is blinded, placebo effect and outcome  
11  
12  
13 measurement bias should be minimised. However, subjective outcomes including quality of  
14  
15  
16 life could not be assessed.  
17  
18  
19  
20  
21  
22  
23  
24  
25  
26  
27  
28  
29  
30  
31  
32  
33  
34  
35  
36  
37  
38  
39  
40  
41  
42  
43  
44  
45  
46  
47  
48  
49  
50  
51  
52  
53  
54  
55  
56  
57  
58  
59  
60

For peer review only

## List of abbreviations

ACEI – angiotensin-converting enzyme inhibitors

ANCOVA – analysis of covariance

ARB – angiotensin II receptor blockers

BMI – body mass index

CI – confidence interval

CM – Chinese medicine

Co-I – co-investigator

CONSORT – Consolidated Standards of Reporting Trials

CTCAE – Common Terminology Criteria for Adverse Events

DKD – diabetic kidney disease

CKD – chronic kidney disease

GMP – Good Manufacturing Practice

HbA<sub>1c</sub> – haemoglobin A<sub>1c</sub>

MCP-1 – monocyte chemotactic protein 1

NF- $\kappa$ B – nuclear factor kappa-light-chain-enhancer of activated B cells

PI – principal investigator

RA – research assistant

RAAS – renin–angiotensin–aldosterone system

1  
2  
3  
4 SAE – serious adverse event  
5  
6

7 TGF- $\beta_1$  – transforming growth factor beta-1  
8  
9

10 UACR – urine albumin-to-creatinine ratio  
11  
12  
13  
14  
15  
16  
17  
18  
19  
20  
21  
22  
23  
24  
25  
26  
27  
28  
29  
30  
31  
32  
33  
34  
35  
36  
37  
38  
39  
40  
41  
42  
43  
44  
45  
46  
47  
48  
49  
50  
51  
52  
53  
54  
55  
56  
57  
58  
59  
60

For peer review only

## DECLARATION

### Ethics approval and consent to participate

This study was approved and monitored by the Institutional Review Board of the University of Hong Kong / Hospital Authority Hong Kong West/East/Kowloon Central clusters (Ref: UW 16-553/HKEC-2019-026/REC (KC/KE)-19-0049/ER-4). Written consent will be obtained from all subjects, including change of protocol. This protocol is prospectively registered on ClinicalTrials.gov (NCT03535935) on 24 May 2018. We publish this protocol after the first DSMB meeting.

### Consent for Publication

Not applicable. No personal information is included.

### Availability of data and materials

The datasets used and/or analysed during the current study will be available from the corresponding author on reasonable request.

### Competing interests

None declared.

### Funding

This project is made possible in part through the Health and Medical Research Fund (Ref: 12133341, 14151731). The funding organisation had no role in the design and conduct of the

1  
2  
3  
4 study; collection, management, analysis, and interpretation of the data; preparation, review,  
5  
6  
7 or approval of the manuscript; and decision to submit the manuscript for publication.  
8  
9

### 10 **Authors' Contributions**

11  
12 KW Chan and SCW Tang designed the study. KW Chan, AKS Kwong, PN Tsui, SCY  
13  
14 Cheung, GCW Chan, MMY Wong, KCB Tan and WF Choi recruited the patients and  
15  
16 provided clinical consultation. WH Yiu provided expert opinion and support in biochemical  
17  
18 analysis. L Lao, Z Zhang, Y Zhang provided expert opinion on the study design. KW Chan  
19  
20 and SCW Tang drafted the manuscript. All authors involved in the manuscript revision.  
21  
22  
23  
24  
25  
26  
27

### 28 **Acknowledgements**

29  
30 We thank Ms Ka Yan YU and Ms Feona LEUNG for the clinical service; Ms Pearl YAN, Ms  
31  
32 Kam Yan YU, Dr Johnny LAM, Ms Louise PUN, Ms Sally LAM, Ms Ying WONG and Mr  
33  
34 Tommy LEE for the patient coordination and clerical support; Mr Spencer NG from  
35  
36 Information and Technology for the generation and concealment of randomisation sequence;  
37  
38 Ms Janice WONG and C&H Medical Laboratories Ltd. for the independent analysis of  
39  
40 clinical samples; and all clinical and scientific staffs involved in the patient care and sample  
41  
42 analysis. This project is a part of SCHEMATIC Initiative and we thank all the team members  
43  
44 of SCHEMATIC for their contribution. We also thank Prof Vincent CHUNG, Prof Wendy  
45  
46 WONG and Dr Jerry YEUNG for monitoring this trial as DSMB panel members.  
47  
48  
49  
50  
51  
52  
53  
54  
55  
56  
57  
58  
59  
60

## REFERENCES

1. Sinclair A, Saeedi P, Kaundal A, Karuranga S, Malanda B, Williams R. Diabetes and global ageing among 65-99-year-old adults: Findings from the International Diabetes Federation Diabetes Atlas, 9(th) edition. *Diabetes Res Clin Pract.* 2020:108078.
2. Cho NH, Shaw JE, Karuranga S, Huang Y, da Rocha Fernandes JD, Ohlrogge AW, et al. IDF Diabetes Atlas: Global estimates of diabetes prevalence for 2017 and projections for 2045. *Diabetes Res Clin Pract.* 2018;138:271-81.
3. Ogurtsova K, da Rocha Fernandes JD, Huang Y, Linnenkamp U, Guariguata L, Cho NH, et al. IDF Diabetes Atlas: Global estimates for the prevalence of diabetes for 2015 and 2040. *Diabetes Res Clin Pract.* 2017;128:40-50.
4. Thomas MC, Cooper ME, Zimmet P. Changing epidemiology of type 2 diabetes mellitus and associated chronic kidney disease. *Nature Reviews Nephrology.* 2016;12(2):73-81.
5. Tang SCW, Yiu WH. Innate immunity in diabetic kidney disease. *Nature Reviews Nephrology.* 2020;16(4):206-22.
6. Leung CB, Cheung WL, Li PK. Renal registry in Hong Kong-the first 20 years. *Kidney Int Suppl.* 2015;5(1):33-8.
7. Jiao F, Wong CKH, Tang SCW, Fung CSC, Tan KCB, McGhee S, et al. Annual direct medical costs associated with diabetes-related complications in the event year and in

1  
2  
3  
4 subsequent years in Hong Kong. *Diabetic Medicine*. 2017;34(9):1276-83.  
5  
6

7 8. Afkarian M, Sachs MC, Kestenbaum B, Hirsch IB, Tuttle KR, Himmelfarb J, et al.  
8  
9

10 Kidney disease and increased mortality risk in type 2 diabetes. *J Am Soc Nephrol*.  
11  
12

13 2013;24(2):302-8.  
14  
15

16 9. Wen CP, Chang CH, Tsai MK, Lee JH, Lu PJ, Tsai SP, et al. Diabetes with early kidney  
17  
18

19 involvement may shorten life expectancy by 16 years. *Kidney Int*. 2017;92(2):388-96.  
20  
21

22 10. Goh SY, Cooper ME. Clinical review: The role of advanced glycation end products in  
23  
24

25 progression and complications of diabetes. *The Journal of Clinical Endocrinology and*  
26  
27

28 *Metabolism*. 2008;93(4):1143-52.  
29  
30

31 11. Forbes JM, Cooper ME, Oldfield MD, Thomas MC. Role of advanced glycation end  
32  
33

34 products in diabetic nephropathy. *J Am Soc Nephrol*. 2003;14(8 Suppl 3):S254-8.  
35  
36

37 12. Pichler R, Afkarian M, Dieter BP, Tuttle KR. Immunity and inflammation in diabetic  
38  
39

40 kidney disease: translating mechanisms to biomarkers and treatment targets. *American*  
41  
42

43 *Journal of Physiology Renal Physiology*. 2017;312(4):F716-f31.  
44  
45

46 13. Navarro-Gonzalez JF, Mora-Fernandez C. The role of inflammatory cytokines in  
47  
48

49 diabetic nephropathy. *J Am Soc Nephrol*. 2008;19(3):433-42.  
50  
51

52 14. Navarro-Gonzalez JF, Mora-Fernandez C, Muros de Fuentes M, Garcia-Perez J.  
53  
54

55 Inflammatory molecules and pathways in the pathogenesis of diabetic nephropathy. *Nature*  
56  
57

58 *Reviews Nephrology*. 2011;7(6):327-40.  
59  
60

- 1  
2  
3  
4 15. Alicic RZ, Rooney MT, Tuttle KR. Diabetic Kidney Disease: Challenges, Progress, and  
5  
6  
7 Possibilities. *Clin J Am Soc Nephrol*. 2017;12(12):2032-45.  
8  
9  
10 16. Premaratne E, Verma S, Ekinci EI, Theverkalam G, Jerums G, MacIsaac RJ. The impact  
11  
12 of hyperfiltration on the diabetic kidney. *Diabetes & Metabolism*. 2015;41(1):5-17.  
13  
14  
15 17. Tonneijck L, Muskiet MH, Smits MM, van Bommel EJ, Heerspink HJ, van Raalte DH,  
16  
17 et al. Glomerular Hyperfiltration in Diabetes: Mechanisms, Clinical Significance, and  
18  
19 Treatment. *J Am Soc Nephrol*. 2017;28(4):1023-39.  
20  
21  
22 18. Palatini P. Glomerular hyperfiltration: a marker of early renal damage in pre-diabetes  
23  
24 and pre-hypertension. *Nephrol Dial Transplant*. 2012;27(5):1708-14.  
25  
26  
27 19. Yiu WH, Li RX, Wong DWL, Wu HJ, Chan KW, Chan LYY, et al. Complement C5a  
28  
29 inhibition moderates lipid metabolism and reduces tubulointerstitial fibrosis in diabetic  
30  
31 nephropathy. *Nephrol Dial Transplant*. 2018;33(8):1323-32.  
32  
33  
34 20. Alsaad KO, Herzenberg AM. Distinguishing diabetic nephropathy from other causes of  
35  
36 glomerulosclerosis: an update. *Journal of Clinical Pathology*. 2007;60(1):18-26.  
37  
38  
39 21. Hsu TW, Liu JS, Hung SC, Kuo KL, Chang YK, Chen YC, et al. Renoprotective effect  
40  
41 of renin-angiotensin-aldosterone system blockade in patients with predialysis advanced  
42  
43 chronic kidney disease, hypertension, and anemia. *JAMA Internal Medicine*.  
44  
45 2014;174(3):347-54.  
46  
47  
48 22. Nistor I, De Sutter J, Drechsler C, Goldsmith D, Soler MJ, Tomson C, et al. Effect of  
49  
50  
51  
52  
53  
54  
55  
56  
57  
58  
59  
60



- 1  
2  
3  
4 renin-angiotensin-aldosterone system blockade in adults with diabetes mellitus and advanced  
5  
6  
7 chronic kidney disease not on dialysis: a systematic review and meta-analysis. *Nephrol Dial*  
8  
9  
10 *Transplant.* 2018;33(1):12-22.  
11  
12  
13 23. Palmer SC, Mavridis D, Navarese E, Craig JC, Tonelli M, Salanti G, et al. Comparative  
14  
15  
16 efficacy and safety of blood pressure-lowering agents in adults with diabetes and kidney  
17  
18  
19 disease: a network meta-analysis. *The Lancet.* 2015;385(9982):2047-56.  
20  
21  
22 24. Chan GC, Tang SC. Proteinuria reaffirmed as a risk modifier in diabetic chronic kidney  
23  
24  
25 disease. *Nephrol Dial Transplant.* 2018;33(11):1873-74.  
26  
27  
28 25. Chan GC, Tang SC. Diabetic nephropathy: landmark clinical trials and tribulations.  
29  
30  
31 *Nephrol Dial Transplant.* 2016;31(3):359-68.  
32  
33  
34 26. Lin MY, Chiu YW, Chang JS, Lin HL, Lee CT, Chiu GF, et al. Association of  
35  
36  
37 prescribed Chinese herbal medicine use with risk of end-stage renal disease in patients with  
38  
39  
40 chronic kidney disease. *Kidney Int.* 2015;5(10):226.  
41  
42  
43 27. Hsieh CF, Huang SL, Chen CL, Chen WT, Chang HC, Yang CC. Non-aristolochic acid  
44  
45  
46 prescribed Chinese herbal medicines and the risk of mortality in patients with chronic kidney  
47  
48  
49 disease: results from a population-based follow-up study. *BMJ Open.* 2014;4(2):2013-  
50  
51  
52 004033.  
53  
54  
55 28. Li Q, Zhang H, Fei Y, et al, Treatment of Diabetic Nephropathy by Integrative  
56  
57  
58 Medicine: A Multi-center Prospective Cohort Study. *Chinese Journal of Integrated*  
59  
60

1  
2  
3  
4 *Traditional and Western Medicine*. 2012;32(3):317-21.

5  
6  
7 29. Zhang HW, Lin ZX, Xu C, Leung C, Chan LS. Astragalus (a traditional Chinese  
8  
9  
10  
11  
12  
13  
14  
15  
16  
17  
18  
19  
20  
21  
22  
23  
24  
25  
26  
27  
28  
29  
30  
31  
32  
33  
34  
35  
36  
37  
38  
39  
40  
41  
42  
43  
44  
45  
46  
47  
48  
49  
50  
51  
52  
53  
54  
55  
56  
57  
58  
59  
60  
medicine) for treating chronic kidney disease. *The Cochrane Database of Systematic  
Reviews*. 2014;22(10).

30. Li M, Wang W, Xue J, Gu Y, Lin S. Meta-analysis of the clinical value of Astragalus  
membranaceus in diabetic nephropathy. *Journal of Ethnopharmacology*. 2011;133(2):412-9.

31. LIU Yi-hong, TIAN Hao-ming. Effect of Astragaulus Membranaceus on Diabetic  
Nephropathy:A Systematic Review. *Chinese Journal of Evidence-Based Medicine*.  
2007;7(10):715-27.

32. Gui D, Guo Y, Wang F, Liu W, Chen J, Chen Y, et al. Astragaloside IV, a novel  
antioxidant, prevents glucose-induced podocyte apoptosis in vitro and in vivo. *PloS One*.  
2012;7(6):22.

33. Sun L, Li W, Xiong L, Li G, Ma R. Astragaloside IV prevents damage to human  
mesangial cells through the inhibition of the NADPH oxidase/ROS/Akt/NFkappaB pathway  
under high glucose conditions. *Int J Mol Med*. 2014;34(1):167-76.

34. Chan KW, Chan CW, Leung CPS, Yiu WH, Lui SL, Ip TP, et al. Semi-individualised  
Chinese Medicine Treatment for Diabetic Kidney Disease – From users' perspectives to  
SCHEMATIC trial interim result and potential mechanisms. *Advances in Integrative  
Medicine*; Brisbane. Australia 2019. S12.

- 1  
2  
3  
4 35. Chan KW, Ip TP, Kwong AS, Lui SL, Chan GC, Cowling BJ, et al. Semi-individualised  
5  
6  
7 Chinese medicine treatment as an adjuvant management for diabetic nephropathy: a pilot  
8  
9  
10 add-on, randomised, controlled, multicentre, open-label pragmatic clinical trial. *BMJ Open*.  
11  
12  
13 2016;6(8):e010741.  
14  
15  
16 36. World Health Organisation. General guidelines for methodologies on research and  
17  
18  
19 evaluation of traditional medicine Geneva: World Health Organisation; 2000.  
20  
21  
22 37. Levey AS, Bosch JP, Lewis JB, Greene T, Rogers N, Roth D. A more accurate method  
23  
24  
25 to estimate glomerular filtration rate from serum creatinine: a new prediction equation.  
26  
27  
28 Modification of Diet in Renal Disease Study Group. *Ann Intern Med*. 1999;130(6):461-70.  
29  
30  
31 38. Glasscock RJ, Warnock DG, Delanaye P. The global burden of chronic kidney disease:  
32  
33  
34 estimates, variability and pitfalls. *Nature Reviews Nephrology*. 2017;13(2):104-14.  
35  
36  
37 39. Sim J, Lewis M. The size of a pilot study for a clinical trial should be calculated in  
38  
39  
40 relation to considerations of precision and efficiency. *J Clin Epidemiol*. 2012;65(3):301-8.  
41  
42  
43 40. Moore CG, Carter RE, Nietert PJ, Stewart PW. Recommendations for planning pilot  
44  
45  
46 studies in clinical and translational research. *Clinical and Translational Science*.  
47  
48  
49 2011;4(5):332-7.  
50  
51  
52 41. Pavlou M, Ambler G, Seaman SR, Guttman O, Elliott P, King M, et al. How to develop  
53  
54  
55 a more accurate risk prediction model when there are few events. *BMJ*. 2015;11(351).  
56  
57  
58 42. Li BC. The Combined Treatment of Astragalus and Vasartan for Early Stage Diabetic  
59  
60

1  
2  
3  
4 Kidney Disease. *China Foreign Medical Treatment*. 2011(23):98-100.

5  
6  
7 43. Huang H, Gao J. Astragalus Pharmacological Properties and Use of Research in  
8  
9  
10 Diabetic Nephropathy. *Journal of Practical Traditional Chinese Internal Medicine*.  
11  
12  
13 2011;25(10):80-2.

14  
15  
16 44. Ford I, Norrie J. Pragmatic Trials. *N Engl Med*. 2016;375(5):454-63.

17  
18  
19 45. Grams ME, Sang Y, Ballew SH, Matsushita K, Astor BC, Carrero JJ, et al. Evaluating  
20  
21  
22 Glomerular Filtration Rate Slope as a Surrogate End Point for ESKD in Clinical Trials: An  
23  
24  
25 Individual Participant Meta-Analysis of Observational Data. *J Am Soc Nephrol*.  
26  
27  
28 2019;30(9):1746-55.

29  
30  
31 46. Cheng CW, Wu TX, Shang HC, Li YP, Altman DG, Moher D, et al. CONSORT  
32  
33  
34 Extension for Chinese Herbal Medicine Formulas 2017: Recommendations, Explanation, and  
35  
36  
37 Elaboration. *Ann Intern Med*. 2017;167(2):112-121.

38  
39  
40 47. Krolewski AS, Skupien J, Rossing P, Warram JH. Fast renal decline to end-stage renal  
41  
42  
43 disease: an unrecognized feature of nephropathy in diabetes. *Kidney Int*. 2017;91(6):1300-11.

44  
45  
46 48. Looker HC, Colombo M, Hess S, Brosnan MJ, Farran B, Dalton RN, et al. Biomarkers  
47  
48  
49 of rapid chronic kidney disease progression in type 2 diabetes. *Kidney Int*. 2015;88(4):888-  
50  
51  
52 96.

53  
54  
55 49. Zheng X. Guiding Principle of Clinical Research on New Drugs of Chinese Medicine  
56  
57  
58 (Trial). Beijing: China Medical Science Press; 2002.

- 1  
2  
3  
4 50. Umanath K, Lewis JB. Update on Diabetic Nephropathy: Core Curriculum 2018.  
5  
6  
7 *American Journal of Kidney Diseases*. 2018;71(6):884-95.  
8  
9  
10 51. Chan KW. Integrative management for diabetic kidney disease – Patients’ and  
11  
12 clinicians’ perspectives, clinical effectiveness and possible mechanisms [PhD thesis]. Hong  
13  
14 Kong: The University of Hong Kong; 2018.  
15  
16  
17 52. Ma YC, Zuo L, Chen JH, Luo Q, Yu XQ, Li Y, et al. Modified glomerular filtration rate  
18  
19 estimating equation for Chinese patients with chronic kidney disease. *J Am Soc Nephrol*.  
20  
21 2006;17(10):2937-44.  
22  
23  
24  
25 53. Levey AS, Stevens LA, Schmid CH, Zhang YL, Castro AF, 3rd, Feldman HI, et al. A  
26  
27 new equation to estimate glomerular filtration rate. *Ann Intern Med*. 2009;150(9):604-12.  
28  
29  
30  
31 54. Chan KW, Lee PW, Leung CPS, Chan GCW, Yiu WH, Cheung HM, et al. Patients’ and  
32  
33 clinicians’ expectations on integrative medicine services for diabetes: a focus group study.  
34  
35  
36  
37 *BMC Complementary Medicine and Therapies*. 2020;20(1):205  
38  
39  
40  
41  
42 55. Heerspink HJL, Parving HH, Andress DL, Bakris G, Correa-Rotter R, Hou FF, et al.  
43  
44 Atrasentan and renal events in patients with type 2 diabetes and chronic kidney disease  
45  
46 (SONAR): a double-blind, randomised, placebo-controlled trial. *Lancet*.  
47  
48  
49  
50 2019;393(10184):1937-47.  
51  
52  
53  
54  
55  
56  
57  
58  
59  
60

1  
2  
3  
4 **Figure legends**  
5  
6

7 **Figure 1 The Flow of Research**  
8  
9  
10  
11  
12  
13  
14  
15  
16  
17  
18  
19  
20  
21  
22  
23  
24  
25  
26  
27  
28  
29  
30  
31  
32  
33  
34  
35  
36  
37  
38  
39  
40  
41  
42  
43  
44  
45  
46  
47  
48  
49  
50  
51  
52  
53  
54  
55  
56  
57  
58  
59  
60

For peer review only

**Table 1 Follow-up schedule**

| Timepoint                                                                | STUDY PERIOD     |               |                                    |                              |                                    |
|--------------------------------------------------------------------------|------------------|---------------|------------------------------------|------------------------------|------------------------------------|
|                                                                          | Enrolment        | Allocation    | Post allocation – treatment period |                              |                                    |
|                                                                          | Before treatment | Week 0, Day 1 | Week 1-4 (+/- 3 days)              | After 4-6 weeks (+/- 7 days) | After 24 and 48 weeks (+/- 7 days) |
| <b>ENROLMENT</b>                                                         |                  |               |                                    |                              |                                    |
| Eligibility screen                                                       | X                |               |                                    |                              |                                    |
| Informed consent                                                         | X                |               |                                    |                              |                                    |
| Medical history                                                          | X                |               |                                    |                              |                                    |
| Allocation                                                               |                  | X             |                                    |                              |                                    |
| <b>INTERVENTIONS</b>                                                     |                  |               |                                    |                              |                                    |
| Intervention (interventional group)                                      |                  | X             | X                                  | X                            | X                                  |
| Routine care (all patients)                                              |                  | X             | X                                  | X                            | X                                  |
| <b>ASSESSMENTS</b>                                                       |                  |               |                                    |                              |                                    |
| Renal and liver function tests, other biomarkers (blood and urine tests) | X                |               |                                    | X                            | X                                  |
| Blood pressure, weight, hip-waist circumference                          |                  | X             | X                                  | X                            | X                                  |
| Demographics                                                             |                  | X             |                                    |                              |                                    |
| Clinical presentations                                                   |                  | X             | X                                  | X                            | X                                  |
| Adverse events                                                           |                  | X             | X                                  | X                            | X                                  |

Figure 1. Flow of study

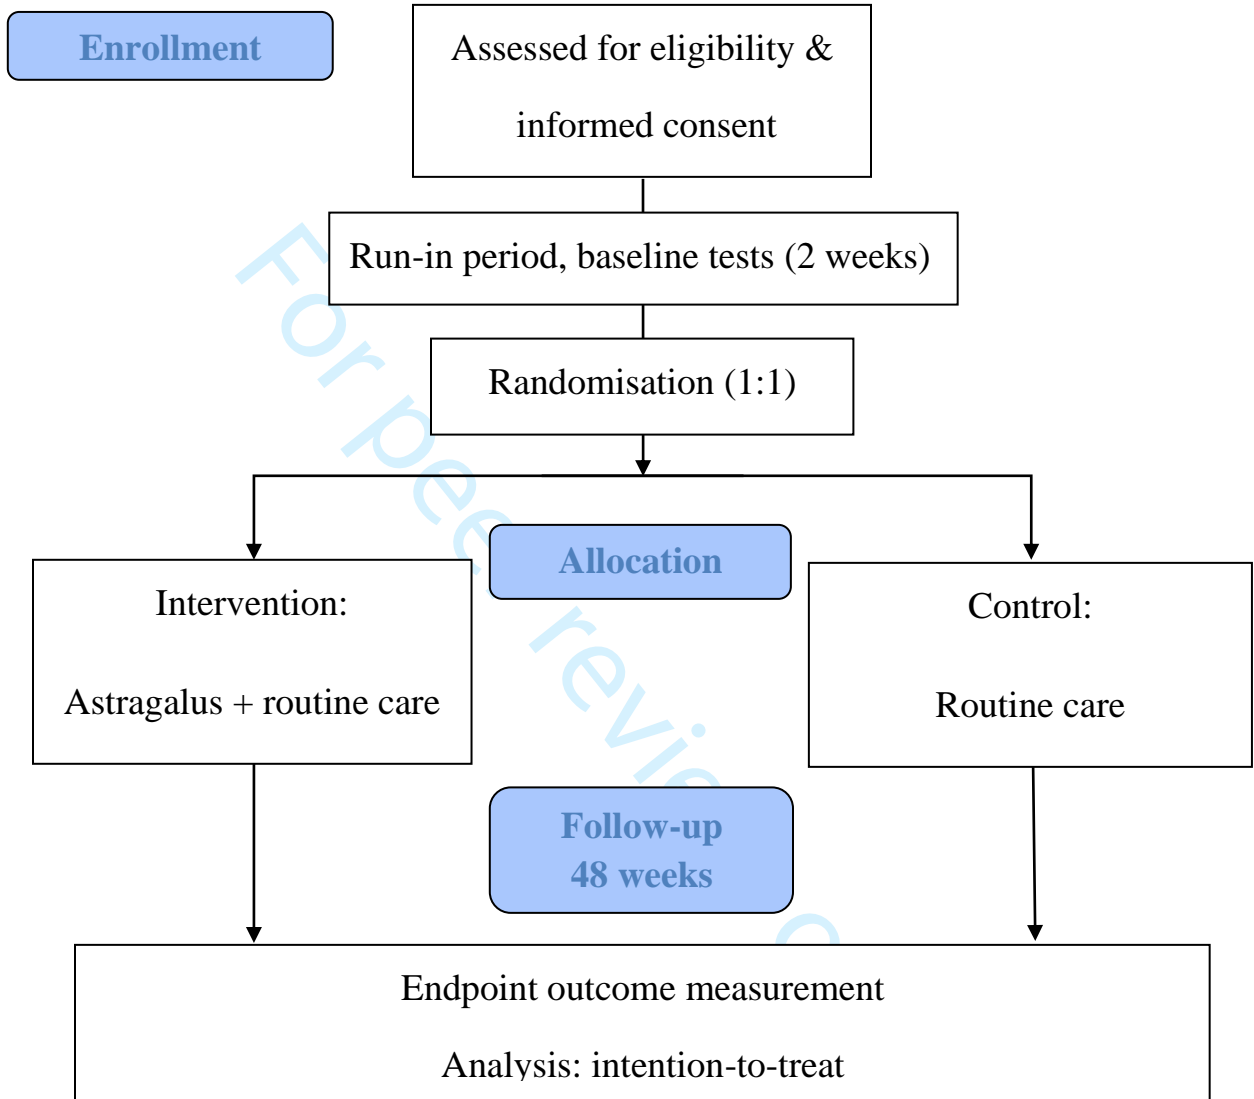



## Appendix 1. World Health Organisation Trial Registration Dataset

| Data Category                                        | Information                                                                                                                                                                                                                                                                        |
|------------------------------------------------------|------------------------------------------------------------------------------------------------------------------------------------------------------------------------------------------------------------------------------------------------------------------------------------|
| <b>Primary Registry and Trial Identifying Number</b> | ClinicalTrials.gov (NCT03535935)                                                                                                                                                                                                                                                   |
| <b>Date of Registration in Primary Registry</b>      | 24 May 2018                                                                                                                                                                                                                                                                        |
| <b>Secondary Identifying Numbers</b>                 | HMRP-14151731                                                                                                                                                                                                                                                                      |
| <b>Source(s) of Monetary or Material Support</b>     | Health and Medical Research Fund, Food and Health Bureau, Hong Kong                                                                                                                                                                                                                |
| <b>Primary Sponsor</b>                               | The University of Hong Kong                                                                                                                                                                                                                                                        |
| <b>Secondary Sponsor(s)</b>                          | N/A                                                                                                                                                                                                                                                                                |
| <b>Contact for Public Queries</b>                    | Prof TANG Chi-wai Sydney MD PhD<br><br>Dr CHAN Kam-wa MSPH MD PhD<br><br>Tel: +852 2255 3603<br><br>Email: <a href="mailto:scwtang@hku.hk">scwtang@hku.hk</a> / <a href="mailto:chriskwc@hku.hk">chriskwc@hku.hk</a>                                                               |
| <b>Public Title</b>                                  | Efficacy, Safety and Response Predictors of Adjuvant Astragalus Therapy for Diabetic Kidney Disease (READY)                                                                                                                                                                        |
| <b>Scientific Title</b>                              | Efficacy, Safety and Response Predictors of Adjuvant Astragalus for Diabetic Kidney Disease (READY) – An Add-on, Assessor-blind, Parallel, Pragmatic Randomised Controlled Trial                                                                                                   |
| <b>Countries of Recruitment</b>                      | Hong Kong SAR, China                                                                                                                                                                                                                                                               |
| <b>Health Condition(s) or Problem(s) Studied</b>     | Diabetic kidney disease                                                                                                                                                                                                                                                            |
| <b>Intervention (s)</b>                              | Active comparator: Standard medical care with angiotensin converting enzyme inhibitor or angiotensin receptor blocker and oral hypoglycemic agents and/or insulin at stable dose<br><br>Experimental arm: Semi-individualised dosage of astragalus on top of standard medical care |
| <b>Key Inclusion and Exclusion Criteria</b>          | Ages eligible for study: between 35 and 80 years old<br><br>Gender eligible for study: Both                                                                                                                                                                                        |

|                                                                                                                                                                                                                                                                                                                                                             |                                                                                                                                                                                                                                                                                                                                                                                                                                                                                                                                                                                                                                                                                                                                                                                                                                                                                                                                                                                                                                                                                                                                                                                                                                                                                                                                                                                                                                                                                                                                                                             |
|-------------------------------------------------------------------------------------------------------------------------------------------------------------------------------------------------------------------------------------------------------------------------------------------------------------------------------------------------------------|-----------------------------------------------------------------------------------------------------------------------------------------------------------------------------------------------------------------------------------------------------------------------------------------------------------------------------------------------------------------------------------------------------------------------------------------------------------------------------------------------------------------------------------------------------------------------------------------------------------------------------------------------------------------------------------------------------------------------------------------------------------------------------------------------------------------------------------------------------------------------------------------------------------------------------------------------------------------------------------------------------------------------------------------------------------------------------------------------------------------------------------------------------------------------------------------------------------------------------------------------------------------------------------------------------------------------------------------------------------------------------------------------------------------------------------------------------------------------------------------------------------------------------------------------------------------------------|
| 1<br>2<br>3<br>4<br>5<br>6<br>7<br>8<br>9<br>10<br>11<br>12<br>13<br>14<br>15<br>16<br>17<br>18<br>19<br>20<br>21<br>22<br>23<br>24<br>25<br>26<br>27<br>28<br>29<br>30<br>31<br>32<br>33<br>34<br>35<br>36<br>37<br>38<br>39<br>40<br>41<br>42<br>43<br>44<br>45<br>46<br>47<br>48<br>49<br>50<br>51<br>52<br>53<br>54<br>55<br>56<br>57<br>58<br>59<br>60 | <p>Healthy volunteers: Not accepted</p> <p><b>Inclusion Criteria:</b></p> <ul style="list-style-type: none"><li>- diagnosed with type 2 diabetes for at least 5 years;</li><li>- with an estimated glomerular filtration rate (GFR) <math>\geq 30</math> &lt;90 mL/min/1.73m<sup>2</sup> confirmed with repeat testing over three or more months calculated by the abbreviated MDRD study equation;</li><li>- persistent macroalbuminuria with spot urine albumin-to-creatinine ratio (UACR) <math>\geq 300</math> mg/g confirmed by at least 2 out of 3 consecutive first morning void urine samples;</li><li>- on stable dose of anti-diabetic drug including insulin for 12 weeks;</li><li>- on stable dose of angiotensin-converting-enzyme inhibitor or angiotensin receptor blocker for 12 weeks; and</li><li>- willing and able to give written informed consent</li></ul> <p><b>Exclusion Criteria:</b></p> <ul style="list-style-type: none"><li>- with known history of glomerulonephritis, polycystic kidney disease, systemic lupus erythematosus, any suggestive evidence of nondiabetic glomerulopathy;</li><li>- with known history of kidney transplant;</li><li>- with concurrent severe disorders of heart, brain, liver, and hematopoietic system, tumor and mental disorder;</li><li>- with deranged liver function;</li><li>- with poorly controlled blood pressure;</li><li>- with known history of intolerance or malabsorption of oral medications;</li><li>- with uncontrollable urinary infection;</li><li>- experiencing pregnancy; or</li></ul> |
|-------------------------------------------------------------------------------------------------------------------------------------------------------------------------------------------------------------------------------------------------------------------------------------------------------------------------------------------------------------|-----------------------------------------------------------------------------------------------------------------------------------------------------------------------------------------------------------------------------------------------------------------------------------------------------------------------------------------------------------------------------------------------------------------------------------------------------------------------------------------------------------------------------------------------------------------------------------------------------------------------------------------------------------------------------------------------------------------------------------------------------------------------------------------------------------------------------------------------------------------------------------------------------------------------------------------------------------------------------------------------------------------------------------------------------------------------------------------------------------------------------------------------------------------------------------------------------------------------------------------------------------------------------------------------------------------------------------------------------------------------------------------------------------------------------------------------------------------------------------------------------------------------------------------------------------------------------|

|                                 |                                                                                                                                                                                                                                                                                                                                                                                                              |
|---------------------------------|--------------------------------------------------------------------------------------------------------------------------------------------------------------------------------------------------------------------------------------------------------------------------------------------------------------------------------------------------------------------------------------------------------------|
|                                 | - participating in other clinical trial within 30 days                                                                                                                                                                                                                                                                                                                                                       |
| <b>Study Type</b>               | <p>Interventional</p> <p>Allocation: randomised</p> <p>Intervention model: parallel assignment (2 arms)</p> <p>Masking: Open label (Assessor of primary outcome measures blinded)</p> <p>Primary purpose: Treatment</p> <p>Phase: II/III</p> <p>Allocation concealment: Sealed opaque envelope prepared by an independent technical staff</p> <p>Sequence generation: computer generated random sequence</p> |
| <b>Date of First Enrollment</b> | July 2018                                                                                                                                                                                                                                                                                                                                                                                                    |
| <b>Target Sample Size</b>       | 118                                                                                                                                                                                                                                                                                                                                                                                                          |
| <b>Recruitment Status</b>       | Recruiting                                                                                                                                                                                                                                                                                                                                                                                                   |
| <b>Primary Outcome(s)</b>       | Changes in estimated glomerular filtration rate and spot urine to albumin ratio (time frame: 48 weeks)                                                                                                                                                                                                                                                                                                       |
| <b>Key Secondary Outcome(s)</b> | Adverse events, changes in, glycated haemoglobin, lipids, blood pressure and other biomarkers                                                                                                                                                                                                                                                                                                                |

## Appendix 2. Sample Consent form

### Patient/Subject Information Sheet

#### 1. STUDY TITLE

Efficacy, safety and response predictors of adjuvant astragalus for diabetic kidney disease (READY) – An open-label randomised controlled trial with responder regression analysis

#### 2. INVITATION PARAGRAPH

You are being invited to take part in a research study. Before you decide it is important for you to understand why the research is being done and what it will involve. Please take time to read the following information carefully and discuss it with friends, relatives and your family doctor if you wish to. Ask us if there is anything that is not clear or if you would like more information. Take time to decide whether or not you wish to take part.

#### 3. WHAT IS THE PURPOSE OF THE STUDY?

Modern pharmacologic therapy using blockers of angiotensin II is unable to fully suppress the progression of chronic kidney disease (CKD). As a result, many patients progress to end-stage kidney disease and require either dialysis or transplantation. Recently, research data shows that astragalus has anti-fibrotic effect, slower the progression to kidney disease and have been using in addition to routine medical care in Hong Kong. However, the actual pharmacological and therapeutic effect of astragalus are unclear. The present study lasting 48 weeks aims to investigate whether astragalus consumption stabilises renal function and reduces albuminuria.

#### 4. WHY HAVE I BEEN CHOSEN?

You have CKD with unsatisfactory proteinuria control despite angiotensin blockade therapy, and are now being invited to participate in this study to investigate the potential beneficial effect of astragalus that is currently widely used in Hong Kong.

#### 5. DO I HAVE TO TAKE PART?

It is up to you to decide whether or not to take part. If you do decide to take part you will be given this information sheet to keep and be asked to sign a consent form. If you decide to take part you are still free to withdraw at any time and without giving a reason. This will not affect the standard of care you receive.

## 6. WHAT WILL HAPPEN TO ME IF I TAKE PART?

You will be randomised by computer after thorough assessment to either receive guidance on astragalus consumption in addition to your standard medications or continue standard medications. The observation period of this study is 48 weeks, and you will be followed up at the clinic in the usual manner, but with additional blood and urine tests as appropriate. You will need to attend 6 extra clinic visits for Chinese medicine consultation in addition to your usual visits over the next 48 weeks.

## 7. WHAT DO I HAVE TO DO?

There are no lifestyle restrictions by participating in this study, except for the need of practicing contraception. As you have CKD, you will be given dietary advice on salt and protein restriction which are necessary even if you are not participating in this study. You will take the astragalus on top of your therapy for your present condition.

## 8. WHAT IS THE DRUG OR PROCEDURE THAT IS BEING TESTED?

Astragalus has been widely consumed for years in Hong Kong although with limited clinical evidence. According to existing best available evidence, astragalus has anti-fibrotic effect and could slower the progression to kidney disease. Currently, no adverse events have been confirmed to associate with the use of astragalus.

## 9. WHAT ARE THE ALTERNATIVES FOR DIAGNOSIS OR TREATMENT?

An alternative treatment option of chronic kidney disease is standard medical care with angiotensin receptor blocker or angiotensin converting enzyme inhibitor alone.

## 10. WHAT ARE THE SIDE EFFECTS OF TAKING PART?

Astragalus is generally well tolerated. There are no known side effects in addition to those of conventional treatment when astragalus is being used within the reference range of Pharmacopeia of China. Nevertheless, astragalus may have unknown side effects. Full evaluation will be performed and adequate monitoring will be exercised once you start taking it. You will need to attend 6 extra clinic visits in addition to your usual visits over the next 48 weeks. Any claims on loss or injury attributable to the study will be arranged by the University of Hong Kong.

## 11. WHAT ARE THE DISADVANTAGES AND RISKS OF TAKING PART?

The safety of the astragalus to the human fetus is unclear, therefore women with child-bearing potential must practice contraception.

## 12. WHAT ARE THE BENEFITS OF TAKING PART?

1  
2  
3 We hope that astragalus will help you. However, this cannot be guaranteed. The information  
4 we get from this study may help us treat future patients with CKD better.  
5  
6  
7

### 8 **13. WHAT IF NEW INFORMATION BECOMES AVAILABLE?**

9 Sometimes during the course of a research project, new information becomes available about  
10 astragalus that is being studied. If this happens, your research doctor will tell you about it and  
11 discuss with you whether you want to continue in the study. If you decide to withdraw your  
12 research doctor will make arrangements for your care to continue. If you decide to continue in  
13 the study you will be asked to sign an updated consent form.  
14  
15  
16  
17

### 18 **14. WHAT HAPPENS WHEN THE RESEARCH STUDY STOPS?**

19 After the study stops, you will be advised whether or not to continue with astragalus according  
20 to clinical need. Astragalus will not be provided for free.  
21  
22  
23

### 24 **15. WHAT IF SOMETHING GOES WRONG?**

25 Any claims on loss or injury attributable to the study will be arranged by the University of Hong  
26 Kong. If you are harmed due to someone's negligence, then you may have grounds for a legal  
27 action. Regardless of this, if you wish to complain about any aspect of the way you have been  
28 approached or treated during the course of this study, the normal health service complaints  
29 mechanisms may be available to you.  
30  
31  
32  
33  
34

### 35 **16. WILL MY TAKING PART IN THIS STUDY BE KEPT CONFIDENTIAL?**

36 You have the rights of access to personal data and publicly available study results, if and  
37 when needed.  
38  
39  
40

41 Under the laws of Hong Kong (in particular the Personal Data (Privacy) Ordinance, Cap  
42 486), you enjoy or may enjoy rights for the protection of the confidentiality of your personal  
43 data, such as those regarding the collection, custody, retention, management, control, use  
44 (including analysis or comparison), transfer in or out of Hong Kong, non-disclosure, erasure  
45 and/or in any way dealing with or disposing of any of your personal data in or for this study.  
46 For any query, you should consult the Privacy Commissioner for Privacy Data or his office  
47 (Tel No. 2827 2827) as to the proper monitoring or supervision of your personal data  
48 protection so that your full awareness and understanding of the significance of compliance  
49 with the law governing privacy data is assured.  
50  
51  
52  
53  
54

55 By consenting to participate in this study, you expressly authorize:  
56  
57  
58  
59  
60

- the principal investigator and his research team and the ethics committee responsible for overseeing this study to get access to, to use, and to retain your personal data for the purposes and in the manner described in this informed consent process; and
- the relevant government agencies (e.g. the Hong Kong Department of Health) to get access to your personal data for the purposes of checking and verifying the integrity of study data and assessing compliance with the study protocol and relevant requirements.

#### **17. WHAT WILL HAPPEN TO THE RESULTS OF THE RESEARCH STUDY?**

The results of this study will be published in a medical journal. Your personal information will be kept confidential.

#### **18. WHO IS ORGANISING AND FUNDING THE RESEARCH?**

This study is supported by the Health and Medical Research Fund and you do not need to pay any extra cost. Your doctor will not be paid for including you in this study.

#### **19. WHO HAS REVIEWED THE STUDY?**

The Institutional Review Board of The University of Hong Kong/Hospital Authority Hong Kong West Cluster has reviewed and approved this study. After recruitment, Each patient will receive HK\$150 for each blood/urine investigation visit related to this study as travel support.

#### **20. CONTACT FOR FURTHER INFORMATION**

In case of enquiry, you may contact Mr Chris Chan or Prof Sydney Tang at 2255 3207. You will be given a copy of this information sheet and a signed consent form to keep. Thank you for taking part in this study!

**From the Division of Nephrology  
Department of Medicine  
University of Hong Kong  
Queen Mary Hospital**

1  
2  
3  
4  
5  
6  
7  
8  
9  
10  
11  
12  
13  
14  
15  
16  
17  
18  
19  
20  
21  
22  
23  
24  
25  
26  
27  
28  
29  
30  
31  
32  
33  
34  
35  
36  
37  
38  
39  
40  
41  
42  
43  
44  
45  
46  
47  
48  
49  
50  
51  
52  
53  
54  
55  
56  
57  
58  
59  
60

## PATIENT/SUBJECT CONSENT FORM

**Title of Project:** Efficacy, safety and response predictors of adjuvant astragalus for diabetic kidney disease (READY) – An open-label randomised controlled trial with responder regression analysis

**Name of Researcher:** Prof Sydney C.W. Tang

Please initial box

1. I confirm that I have read and understood the information sheet dated \_\_\_/\_\_\_/\_\_\_ for the above study and have had the opportunity to ask questions.
2. I understand that my participation is voluntary and that I am free to withdraw at any time, without giving any reason, without my medical care or legal rights being affected.
3. I understand that sections of any of my medical notes may be looked at by responsible individuals from regulatory authorities where it is relevant to my taking part in research. I give permission for these individuals to have access to my records.
4. I agree to take part in the above study.

\_\_\_\_\_  
*Name of patient*

\_\_\_\_\_  
*Date*

\_\_\_\_\_  
*Signature*

\_\_\_\_\_  
*Name of Witness (if applicable)*

\_\_\_\_\_  
*Date*

\_\_\_\_\_  
*Signature*

\_\_\_\_\_  
*Name of person taking consent (if different from researcher)*

\_\_\_\_\_  
*Date*

\_\_\_\_\_  
*Signature*

\_\_\_\_\_  
*Researcher*

\_\_\_\_\_  
*Date*

\_\_\_\_\_  
*Signature*

**Copies to:**

- Patient/Subject
- Researcher's File
- Hospital Record



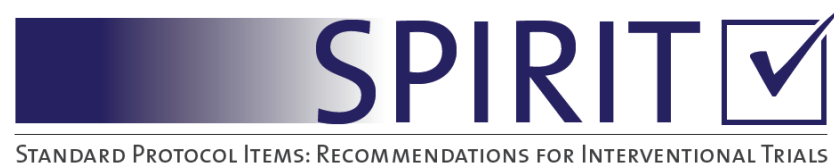

SPIRIT 2013 Checklist: Recommended items to address in a clinical trial protocol and related documents\*

| Section/item                      | Item No | Description                                                                                                                                                                                                                                                                              | Addressed on page number |
|-----------------------------------|---------|------------------------------------------------------------------------------------------------------------------------------------------------------------------------------------------------------------------------------------------------------------------------------------------|--------------------------|
| <b>Administrative information</b> |         |                                                                                                                                                                                                                                                                                          |                          |
| Title                             | 1       | Descriptive title identifying the study design, population, interventions, and, if applicable, trial acronym                                                                                                                                                                             | ___ 1 ___                |
| Trial registration                | 2a      | Trial identifier and registry name. If not yet registered, name of intended registry                                                                                                                                                                                                     | ___ 4 ___                |
|                                   | 2b      | All items from the World Health Organization Trial Registration Data Set                                                                                                                                                                                                                 | ___ Appendix 1 ___       |
| Protocol version                  | 3       | Date and version identifier                                                                                                                                                                                                                                                              | ___ Appendix 1 ___       |
| Funding                           | 4       | Sources and types of financial, material, and other support                                                                                                                                                                                                                              | ___ Appendix 1 ___       |
| Roles and responsibilities        | 5a      | Names, affiliations, and roles of protocol contributors                                                                                                                                                                                                                                  | ___ Appendix 1 ___       |
|                                   | 5b      | Name and contact information for the trial sponsor                                                                                                                                                                                                                                       | ___ Appendix 1 ___       |
|                                   | 5c      | Role of study sponsor and funders, if any, in study design; collection, management, analysis, and interpretation of data; writing of the report; and the decision to submit the report for publication, including whether they will have ultimate authority over any of these activities | ___ 27, 28 ___           |
|                                   | 5d      | Composition, roles, and responsibilities of the coordinating centre, steering committee, endpoint adjudication committee, data management team, and other individuals or groups overseeing the trial, if applicable (see Item 21a for data monitoring committee)                         | ___ 17, 28 ___           |

|    |                                                           |     |                                                                                                               |                    |
|----|-----------------------------------------------------------|-----|---------------------------------------------------------------------------------------------------------------|--------------------|
| 1  | <b>Introduction</b>                                       |     |                                                                                                               |                    |
| 2  |                                                           |     |                                                                                                               |                    |
| 3  | Background and                                            | 6a  | Description of research question and justification for undertaking the trial, including summary of relevant   | ___7-9___          |
| 4  | rationale                                                 |     | studies (published and unpublished) examining benefits and harms for each intervention                        |                    |
| 5  |                                                           |     |                                                                                                               |                    |
| 6  |                                                           | 6b  | Explanation for choice of comparators                                                                         | __8, 9, 14, 15__   |
| 7  |                                                           |     |                                                                                                               |                    |
| 8  | Objectives                                                | 7   | Specific objectives or hypotheses                                                                             | ___10___           |
| 9  |                                                           |     |                                                                                                               |                    |
| 10 | Trial design                                              | 8   | Description of trial design including type of trial (eg, parallel group, crossover, factorial, single group), |                    |
| 11 |                                                           |     | allocation ratio, and framework (eg, superiority, equivalence, noninferiority, exploratory)                   | ___1, 10___        |
| 12 |                                                           |     |                                                                                                               |                    |
| 13 |                                                           |     |                                                                                                               |                    |
| 14 | <b>Methods: Participants, interventions, and outcomes</b> |     |                                                                                                               |                    |
| 15 |                                                           |     |                                                                                                               |                    |
| 16 | Study setting                                             | 9   | Description of study settings (eg, community clinic, academic hospital) and list of countries where data will | ___13___           |
| 17 |                                                           |     | be collected. Reference to where list of study sites can be obtained                                          |                    |
| 18 |                                                           |     |                                                                                                               |                    |
| 19 | Eligibility criteria                                      | 10  | Inclusion and exclusion criteria for participants. If applicable, eligibility criteria for study centres and  | __10, 11, 14__     |
| 20 |                                                           |     | individuals who will perform the interventions (eg, surgeons, psychotherapists)                               |                    |
| 21 |                                                           |     |                                                                                                               |                    |
| 22 | Interventions                                             | 11a | Interventions for each group with sufficient detail to allow replication, including how and when they will be | ___14, 15___       |
| 23 |                                                           |     | administered                                                                                                  |                    |
| 24 |                                                           |     |                                                                                                               |                    |
| 25 |                                                           | 11b | Criteria for discontinuing or modifying allocated interventions for a given trial participant (eg, drug dose  | ___17, 18__        |
| 26 |                                                           |     | change in response to harms, participant request, or improving/worsening disease)                             |                    |
| 27 |                                                           |     |                                                                                                               |                    |
| 28 |                                                           | 11c | Strategies to improve adherence to intervention protocols, and any procedures for monitoring adherence        | ___18___           |
| 29 |                                                           |     | (eg, drug tablet return, laboratory tests)                                                                    |                    |
| 30 |                                                           |     |                                                                                                               |                    |
| 31 |                                                           | 11d | Relevant concomitant care and interventions that are permitted or prohibited during the trial                 | ___10, 14___       |
| 32 |                                                           |     |                                                                                                               |                    |
| 33 | Outcomes                                                  | 12  | Primary, secondary, and other outcomes, including the specific measurement variable (eg, systolic blood       | ___15___           |
| 34 |                                                           |     | pressure), analysis metric (eg, change from baseline, final value, time to event), method of aggregation (eg, |                    |
| 35 |                                                           |     | median, proportion), and time point for each outcome. Explanation of the clinical relevance of chosen         |                    |
| 36 |                                                           |     | efficacy and harm outcomes is strongly recommended                                                            |                    |
| 37 |                                                           |     |                                                                                                               |                    |
| 38 | Participant timeline                                      | 13  | Time schedule of enrolment, interventions (including any run-ins and washouts), assessments, and visits for   | _Figure 1, Table 1 |
| 39 |                                                           |     | participants. A schematic diagram is highly recommended (see Figure)                                          |                    |
| 40 |                                                           |     |                                                                                                               |                    |
| 41 |                                                           |     |                                                                                                               |                    |
| 42 |                                                           |     |                                                                                                               |                    |
| 43 |                                                           |     |                                                                                                               |                    |
| 44 |                                                           |     |                                                                                                               |                    |
| 45 |                                                           |     |                                                                                                               |                    |
| 46 |                                                           |     |                                                                                                               |                    |

|   |             |    |                                                                                                                                                                                       |              |
|---|-------------|----|---------------------------------------------------------------------------------------------------------------------------------------------------------------------------------------|--------------|
| 1 | Sample size | 14 | Estimated number of participants needed to achieve study objectives and how it was determined, including clinical and statistical assumptions supporting any sample size calculations | ___11, 12___ |
| 2 |             |    |                                                                                                                                                                                       |              |
| 3 |             |    |                                                                                                                                                                                       |              |
| 4 | Recruitment | 15 | Strategies for achieving adequate participant enrolment to reach target sample size                                                                                                   | ___13, 18___ |
| 5 |             |    |                                                                                                                                                                                       |              |

## 6 **Methods: Assignment of interventions (for controlled trials)**

### 7 Allocation:

|    |                                  |     |                                                                                                                                                                                                                                                                                                                                                          |                  |
|----|----------------------------------|-----|----------------------------------------------------------------------------------------------------------------------------------------------------------------------------------------------------------------------------------------------------------------------------------------------------------------------------------------------------------|------------------|
| 8  |                                  |     |                                                                                                                                                                                                                                                                                                                                                          |                  |
| 9  |                                  |     |                                                                                                                                                                                                                                                                                                                                                          |                  |
| 10 | Sequence generation              | 16a | Method of generating the allocation sequence (eg, computer-generated random numbers), and list of any factors for stratification. To reduce predictability of a random sequence, details of any planned restriction (eg, blocking) should be provided in a separate document that is unavailable to those who enrol participants or assign interventions | ___13, 14___     |
| 11 |                                  |     |                                                                                                                                                                                                                                                                                                                                                          |                  |
| 12 |                                  |     |                                                                                                                                                                                                                                                                                                                                                          |                  |
| 13 |                                  |     |                                                                                                                                                                                                                                                                                                                                                          |                  |
| 14 |                                  |     |                                                                                                                                                                                                                                                                                                                                                          |                  |
| 15 |                                  |     |                                                                                                                                                                                                                                                                                                                                                          |                  |
| 16 | Allocation concealment mechanism | 16b | Mechanism of implementing the allocation sequence (eg, central telephone; sequentially numbered, opaque, sealed envelopes), describing any steps to conceal the sequence until interventions are assigned                                                                                                                                                | ___13, 14___     |
| 17 |                                  |     |                                                                                                                                                                                                                                                                                                                                                          |                  |
| 18 |                                  |     |                                                                                                                                                                                                                                                                                                                                                          |                  |
| 19 |                                  |     |                                                                                                                                                                                                                                                                                                                                                          |                  |
| 20 | Implementation                   | 16c | Who will generate the allocation sequence, who will enrol participants, and who will assign participants to interventions                                                                                                                                                                                                                                | ___13, 14, 28___ |
| 21 |                                  |     |                                                                                                                                                                                                                                                                                                                                                          |                  |
| 22 |                                  |     |                                                                                                                                                                                                                                                                                                                                                          |                  |
| 23 |                                  |     |                                                                                                                                                                                                                                                                                                                                                          |                  |
| 24 | Blinding (masking)               | 17a | Who will be blinded after assignment to interventions (eg, trial participants, care providers, outcome assessors, data analysts), and how                                                                                                                                                                                                                | ___14___         |
| 25 |                                  |     |                                                                                                                                                                                                                                                                                                                                                          |                  |
| 26 |                                  |     |                                                                                                                                                                                                                                                                                                                                                          |                  |
| 27 |                                  | 17b | If blinded, circumstances under which unblinding is permissible, and procedure for revealing a participant's allocated intervention during the trial                                                                                                                                                                                                     | ___14___         |
| 28 |                                  |     |                                                                                                                                                                                                                                                                                                                                                          |                  |
| 29 |                                  |     |                                                                                                                                                                                                                                                                                                                                                          |                  |
| 30 |                                  |     |                                                                                                                                                                                                                                                                                                                                                          |                  |

## 31 **Methods: Data collection, management, and analysis**

|    |                         |     |                                                                                                                                                                                                                                                                                                                                                                                                              |             |
|----|-------------------------|-----|--------------------------------------------------------------------------------------------------------------------------------------------------------------------------------------------------------------------------------------------------------------------------------------------------------------------------------------------------------------------------------------------------------------|-------------|
| 32 |                         |     |                                                                                                                                                                                                                                                                                                                                                                                                              |             |
| 33 | Data collection methods | 18a | Plans for assessment and collection of outcome, baseline, and other trial data, including any related processes to promote data quality (eg, duplicate measurements, training of assessors) and a description of study instruments (eg, questionnaires, laboratory tests) along with their reliability and validity, if known. Reference to where data collection forms can be found, if not in the protocol | ___15-17___ |
| 34 |                         |     |                                                                                                                                                                                                                                                                                                                                                                                                              |             |
| 35 |                         |     |                                                                                                                                                                                                                                                                                                                                                                                                              |             |
| 36 |                         |     |                                                                                                                                                                                                                                                                                                                                                                                                              |             |
| 37 |                         |     |                                                                                                                                                                                                                                                                                                                                                                                                              |             |
| 38 |                         |     |                                                                                                                                                                                                                                                                                                                                                                                                              |             |
| 39 |                         | 18b | Plans to promote participant retention and complete follow-up, including list of any outcome data to be collected for participants who discontinue or deviate from intervention protocols                                                                                                                                                                                                                    | ___18___    |
| 40 |                         |     |                                                                                                                                                                                                                                                                                                                                                                                                              |             |
| 41 |                         |     |                                                                                                                                                                                                                                                                                                                                                                                                              |             |
| 42 |                         |     |                                                                                                                                                                                                                                                                                                                                                                                                              |             |

|    |                                 |     |                                                                                                                                                                                                                                                                                                                                       |                  |
|----|---------------------------------|-----|---------------------------------------------------------------------------------------------------------------------------------------------------------------------------------------------------------------------------------------------------------------------------------------------------------------------------------------|------------------|
| 1  | Data management                 | 19  | Plans for data entry, coding, security, and storage, including any related processes to promote data quality (eg, double data entry; range checks for data values). Reference to where details of data management procedures can be found, if not in the protocol                                                                     | ____ 18 ____     |
| 2  |                                 |     |                                                                                                                                                                                                                                                                                                                                       |                  |
| 3  |                                 |     |                                                                                                                                                                                                                                                                                                                                       |                  |
| 4  |                                 |     |                                                                                                                                                                                                                                                                                                                                       |                  |
| 5  | Statistical methods             | 20a | Statistical methods for analysing primary and secondary outcomes. Reference to where other details of the statistical analysis plan can be found, if not in the protocol                                                                                                                                                              | ____ 19-21 ____  |
| 6  |                                 |     |                                                                                                                                                                                                                                                                                                                                       |                  |
| 7  |                                 |     |                                                                                                                                                                                                                                                                                                                                       |                  |
| 8  |                                 | 20b | Methods for any additional analyses (eg, subgroup and adjusted analyses)                                                                                                                                                                                                                                                              | ____ 21 ____     |
| 9  |                                 |     |                                                                                                                                                                                                                                                                                                                                       |                  |
| 10 |                                 | 20c | Definition of analysis population relating to protocol non-adherence (eg, as randomised analysis), and any statistical methods to handle missing data (eg, multiple imputation)                                                                                                                                                       | ____ 19 ____     |
| 11 |                                 |     |                                                                                                                                                                                                                                                                                                                                       |                  |
| 12 |                                 |     |                                                                                                                                                                                                                                                                                                                                       |                  |
| 13 |                                 |     |                                                                                                                                                                                                                                                                                                                                       |                  |
| 14 | <b>Methods: Monitoring</b>      |     |                                                                                                                                                                                                                                                                                                                                       |                  |
| 15 |                                 |     |                                                                                                                                                                                                                                                                                                                                       |                  |
| 16 | Data monitoring                 | 21a | Composition of data monitoring committee (DMC); summary of its role and reporting structure; statement of whether it is independent from the sponsor and competing interests; and reference to where further details about its charter can be found, if not in the protocol. Alternatively, an explanation of why a DMC is not needed | ____ 17, 28 ____ |
| 17 |                                 |     |                                                                                                                                                                                                                                                                                                                                       |                  |
| 18 |                                 |     |                                                                                                                                                                                                                                                                                                                                       |                  |
| 19 |                                 |     |                                                                                                                                                                                                                                                                                                                                       |                  |
| 20 |                                 |     |                                                                                                                                                                                                                                                                                                                                       |                  |
| 21 |                                 |     |                                                                                                                                                                                                                                                                                                                                       |                  |
| 22 |                                 | 21b | Description of any interim analyses and stopping guidelines, including who will have access to these interim results and make the final decision to terminate the trial                                                                                                                                                               | ____ 18 ____     |
| 23 |                                 |     |                                                                                                                                                                                                                                                                                                                                       |                  |
| 24 |                                 |     |                                                                                                                                                                                                                                                                                                                                       |                  |
| 25 | Harms                           | 22  | Plans for collecting, assessing, reporting, and managing solicited and spontaneously reported adverse events and other unintended effects of trial interventions or trial conduct                                                                                                                                                     | ____ 16, 18 ____ |
| 26 |                                 |     |                                                                                                                                                                                                                                                                                                                                       |                  |
| 27 |                                 |     |                                                                                                                                                                                                                                                                                                                                       |                  |
| 28 | Auditing                        | 23  | Frequency and procedures for auditing trial conduct, if any, and whether the process will be independent from investigators and the sponsor                                                                                                                                                                                           | ____ 17 ____     |
| 29 |                                 |     |                                                                                                                                                                                                                                                                                                                                       |                  |
| 30 |                                 |     |                                                                                                                                                                                                                                                                                                                                       |                  |
| 31 |                                 |     |                                                                                                                                                                                                                                                                                                                                       |                  |
| 32 | <b>Ethics and dissemination</b> |     |                                                                                                                                                                                                                                                                                                                                       |                  |
| 33 |                                 |     |                                                                                                                                                                                                                                                                                                                                       |                  |
| 34 | Research ethics approval        | 24  | Plans for seeking research ethics committee/institutional review board (REC/IRB) approval                                                                                                                                                                                                                                             | ____ 25 ____     |
| 35 |                                 |     |                                                                                                                                                                                                                                                                                                                                       |                  |
| 36 |                                 |     |                                                                                                                                                                                                                                                                                                                                       |                  |
| 37 | Protocol amendments             | 25  | Plans for communicating important protocol modifications (eg, changes to eligibility criteria, outcomes, analyses) to relevant parties (eg, investigators, REC/IRBs, trial participants, trial registries, journals, regulators)                                                                                                      | ____ 17, 22 ____ |
| 38 |                                 |     |                                                                                                                                                                                                                                                                                                                                       |                  |
| 39 |                                 |     |                                                                                                                                                                                                                                                                                                                                       |                  |
| 40 |                                 |     |                                                                                                                                                                                                                                                                                                                                       |                  |
| 41 |                                 |     |                                                                                                                                                                                                                                                                                                                                       |                  |
| 42 |                                 |     |                                                                                                                                                                                                                                                                                                                                       |                  |
| 43 |                                 |     |                                                                                                                                                                                                                                                                                                                                       |                  |
| 44 |                                 |     |                                                                                                                                                                                                                                                                                                                                       |                  |
| 45 |                                 |     |                                                                                                                                                                                                                                                                                                                                       |                  |
| 46 |                                 |     |                                                                                                                                                                                                                                                                                                                                       |                  |

|    |                               |     |                                                                                                                                                                                                                                                                                     |                  |
|----|-------------------------------|-----|-------------------------------------------------------------------------------------------------------------------------------------------------------------------------------------------------------------------------------------------------------------------------------------|------------------|
| 1  | Consent or assent             | 26a | Who will obtain informed consent or assent from potential trial participants or authorised surrogates, and how (see Item 32)                                                                                                                                                        | _____13_____     |
| 2  |                               |     |                                                                                                                                                                                                                                                                                     |                  |
| 3  |                               |     |                                                                                                                                                                                                                                                                                     |                  |
| 4  |                               | 26b | Additional consent provisions for collection and use of participant data and biological specimens in ancillary studies, if applicable                                                                                                                                               | _____N/A_____    |
| 5  |                               |     |                                                                                                                                                                                                                                                                                     |                  |
| 6  |                               |     |                                                                                                                                                                                                                                                                                     |                  |
| 7  | Confidentiality               | 27  | How personal information about potential and enrolled participants will be collected, shared, and maintained in order to protect confidentiality before, during, and after the trial                                                                                                | _____17_____     |
| 8  |                               |     |                                                                                                                                                                                                                                                                                     |                  |
| 9  |                               |     |                                                                                                                                                                                                                                                                                     |                  |
| 10 | Declaration of interests      | 28  | Financial and other competing interests for principal investigators for the overall trial and each study site                                                                                                                                                                       | _____27_____     |
| 11 |                               |     |                                                                                                                                                                                                                                                                                     |                  |
| 12 |                               |     |                                                                                                                                                                                                                                                                                     |                  |
| 13 | Access to data                | 29  | Statement of who will have access to the final trial dataset, and disclosure of contractual agreements that limit such access for investigators                                                                                                                                     | _____17, 27_____ |
| 14 |                               |     |                                                                                                                                                                                                                                                                                     |                  |
| 15 |                               |     |                                                                                                                                                                                                                                                                                     |                  |
| 16 | Ancillary and post-trial care | 30  | Provisions, if any, for ancillary and post-trial care, and for compensation to those who suffer harm from trial participation                                                                                                                                                       | _____N/A_____    |
| 17 |                               |     |                                                                                                                                                                                                                                                                                     |                  |
| 18 |                               |     |                                                                                                                                                                                                                                                                                     |                  |
| 19 |                               |     |                                                                                                                                                                                                                                                                                     |                  |
| 20 | Dissemination policy          | 31a | Plans for investigators and sponsor to communicate trial results to participants, healthcare professionals, the public, and other relevant groups (eg, via publication, reporting in results databases, or other data sharing arrangements), including any publication restrictions | _____22_____     |
| 21 |                               |     |                                                                                                                                                                                                                                                                                     |                  |
| 22 |                               |     |                                                                                                                                                                                                                                                                                     |                  |
| 23 |                               |     |                                                                                                                                                                                                                                                                                     |                  |
| 24 |                               | 31b | Authorship eligibility guidelines and any intended use of professional writers                                                                                                                                                                                                      | _____28_____     |
| 25 |                               |     |                                                                                                                                                                                                                                                                                     |                  |
| 26 |                               | 31c | Plans, if any, for granting public access to the full protocol, participant-level dataset, and statistical code                                                                                                                                                                     | _____27_____     |
| 27 |                               |     |                                                                                                                                                                                                                                                                                     |                  |
| 28 |                               |     |                                                                                                                                                                                                                                                                                     |                  |
| 29 | <b>Appendices</b>             |     |                                                                                                                                                                                                                                                                                     |                  |
| 30 |                               |     |                                                                                                                                                                                                                                                                                     |                  |
| 31 | Informed consent materials    | 32  | Model consent form and other related documentation given to participants and authorised surrogates                                                                                                                                                                                  | ___Appendix 2___ |
| 32 |                               |     |                                                                                                                                                                                                                                                                                     |                  |
| 33 |                               |     |                                                                                                                                                                                                                                                                                     |                  |
| 34 | Biological specimens          | 33  | Plans for collection, laboratory evaluation, and storage of biological specimens for genetic or molecular analysis in the current trial and for future use in ancillary studies, if applicable                                                                                      | _____N/A_____    |
| 35 |                               |     |                                                                                                                                                                                                                                                                                     |                  |
| 36 |                               |     |                                                                                                                                                                                                                                                                                     |                  |

\*It is strongly recommended that this checklist be read in conjunction with the SPIRIT 2013 Explanation & Elaboration for important clarification on the items. Amendments to the protocol should be tracked and dated. The SPIRIT checklist is copyrighted by the SPIRIT Group under the Creative Commons "[Attribution-NonCommercial-NoDerivs 3.0 Unported](https://creativecommons.org/licenses/by-nc-nd/3.0/)" license.
